# Supplementary material for: Tandem electrophilic thiocyanation/cyclization of α-alkynyl oximes for synthesis of 4-thiocyanatoisoxazoles
Source: Royal Society of Chemistry journal article supplement (doi:10.1039/d5nj03863d), 2026-01-01

## Tandem Electrophilic Thiocyanation/Cyclization of $\alpha$ -Alkynyl Oximes for Synthesis of 4-Thiocyanatoisoxazoles

Xiaowei Liu,<sup>a</sup> Chukai Shao,<sup>a</sup> Hongquan Yin,<sup>a,b</sup> Kaixiang Liu<sup>c</sup> and Fu-Xue Chen<sup>\*a,b</sup>

- a. School of Chemistry & Chemical Engineering, Beijing Institute of Technology (Liangxiang Campus), Beijing 102488, China
- b. Key Laboratory of Medical Molecule Science and Pharmaceuticals Engineering, Ministry of Industry and Information Technology, Beijing Institute of Technology (Liangxiang Campus), Beijing 102488, China

E-mail: fuxue.chen@bit.edu.cn

- c. China Resources Double-Crane Pharmaceutical Co., Ltd. Cangzhou Branch. R&D Department, No.3 Huatuo Road, Lingang Economic Development Zone, HuangHua city, Cangzhou city, 061100, Hebei province.

### Supporting Information

#### Contents

|                                                                                    |     |
|------------------------------------------------------------------------------------|-----|
| 1. General Information .....                                                       | S2  |
| 2. Preparation of <i>O</i> -Methyl oxime.....                                      | S2  |
| 3. Preparation of <i>N</i> -thiocyanato-dibenzenesulfonimide .....                 | S11 |
| 4. General Procedure for the Synthesis of <b>3</b> .....                           | S11 |
| 5. Gram Scale Reaction and Derivatization of Products .....                        | S21 |
| 6. Single Crystal X-Ray Data for Compound <b>3j</b> (CCDC 2486964).....            | S24 |
| 7. References .....                                                                | S25 |
| 8. Copies of <sup>1</sup> H, <sup>13</sup> C and <sup>19</sup> F NMR Spectra ..... | S26 |

## 1. General Information

All chemicals were bought from commercial companies and used directly unless noted. All reactions monitored by thin-layer chromatography (TLC). TLC was performed on silica gel F<sub>254</sub> TLC glass plates and visualized with UV light. <sup>1</sup>H NMR, <sup>19</sup>F NMR and <sup>13</sup>C NMR spectra were recorded on a Bruker Advance 500 M NMR spectrometers (CDCl<sub>3</sub>, DMSO-d<sub>6</sub> as solvent). <sup>19</sup>F NMR were recorded with Bruker Avance (471 MHz) <sup>19</sup>F NMR chemical shifts are reported in ppm from trichlorofluoromethane. <sup>1</sup>H NMR spectra were recorded with Bruker Avance (500 MHz) spectrometer, <sup>1</sup>H NMR chemical shifts are reported in ppm from tetramethylsilane, <sup>13</sup>C {<sup>1</sup>H} NMR spectra were recorded with Bruker Avance (126 MHz) spectrometer with complete proton decoupling. Chemical shifts are reported in ppm from the tetramethylsilane with the solvent resonance as internal standard (CDCl<sub>3</sub>,  $\delta$  77.0). s = singlet, d = doublet, t = triplet, m = multiplet or unresolved, PE = petroleum ether, EA = ethyl acetate. The high resolution mass spectrum (HRMS) were recorded on an Agilent (Q-TOF6520) unit with an ESI source. IR spectra were measured on a Shimadzu IRAffinity-1s spectrometer. Melting points were measured on a binocular microscope XT4A melting point apparatus (uncorrected).

## 2. Preparation of *O*-Methyl oxime

Substrates **1a-1v** were prepared according to literature procedures.<sup>1-9</sup>

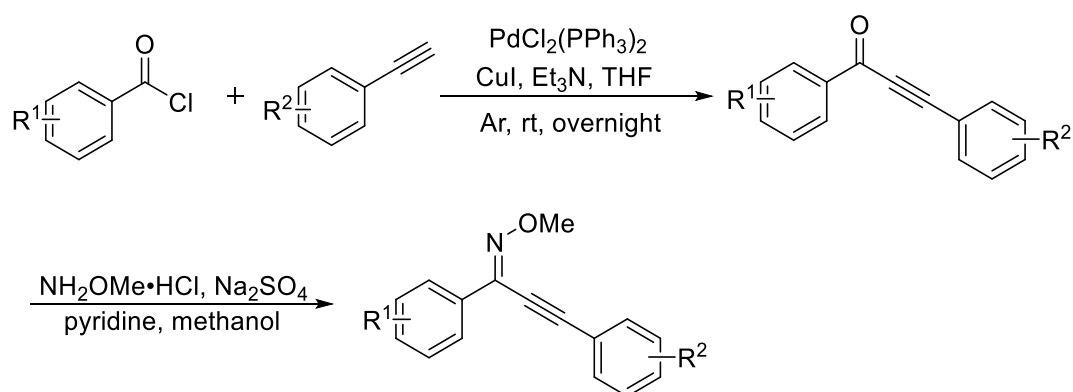

**Procedure for the Synthesis of 1a-1v.** Under an argon atmosphere, a mixture of acyl chloride (12 mmol), PdCl<sub>2</sub>(PPh<sub>3</sub>)<sub>2</sub> (2 mol%), and Et<sub>3</sub>N (12 mmol) in anhydrous

THF (30 mL) was stirred at room temperature in a 100 mL round-bottom flask for 10 min. CuI (4 mol%) was added, and stirring was continued for an additional 10 min. Subsequently, the terminal alkyne (10 mmol) was introduced, and the resulting mixture was stirred at room temperature overnight (reaction progress monitored by TLC). After complete consumption of the starting material, water (50 mL) was added. The aqueous layer was extracted with ethyl acetate (3 × 50 mL). The combined organic extracts were washed with brine, dried over anhydrous Na<sub>2</sub>SO<sub>4</sub>, and filtered. The filtrate was concentrated under reduced pressure. Purification by silica gel column chromatography (eluent: PE/EA) afforded the desired product.

In a 50 mL round-bottom flask, a mixture of ynone (4 mmol), methoxyamine hydrochloride (8 mmol), anhydrous Na<sub>2</sub>SO<sub>4</sub> (8 mmol), pyridine (1.2 mL), and methanol (15 mL) was stirred at room temperature overnight (reaction monitored by TLC). When the reaction was completed, the reaction was quenched with water (40 mL) and extracted with ethyl acetate (3 × 40 mL). The combined organic layers were washed with brine, dried over anhydrous Na<sub>2</sub>SO<sub>4</sub>, and filtered. After concentration under reduced pressure, the residue was purified by silica gel column chromatography (eluent: PE/EA) to afford the desired products **1a-1v** in 35-76% yields.

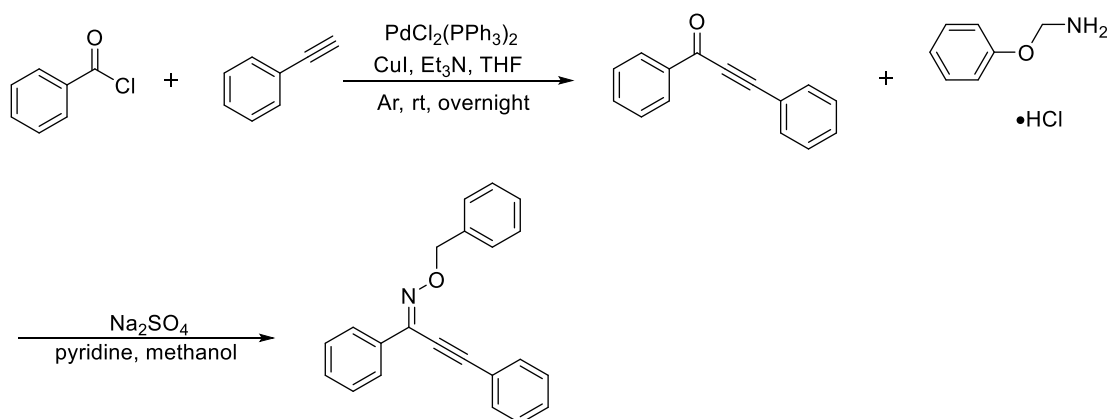

**Procedure for the Synthesis of 1a'.** Under an argon atmosphere, a mixture of benzoyl chloride (12 mmol),  $\text{PdCl}_2(\text{PPh}_3)_2$  (2 mol%), and  $\text{Et}_3\text{N}$  (12 mmol) in anhydrous THF (30 mL) was stirred at room temperature in a 100 mL round-bottom flask for 10 min. CuI (4 mol%) was added, and stirring was continued for an additional 10 min. Subsequently, the phenylacetylene (10 mmol) was introduced, and the resulting

mixture was stirred at room temperature overnight (reaction progress monitored by TLC). After complete consumption of the starting material, water (50 mL) was added. The aqueous layer was extracted with ethyl acetate (3 × 50 mL). The combined organic extracts were washed with brine, dried over anhydrous Na<sub>2</sub>SO<sub>4</sub>, and filtered. The filtrate was concentrated under reduced pressure. Purification by silica gel column chromatography (eluent: PE/EA) afforded the desired product.

In a 50 mL round-bottom flask, a mixture of 1,3-diphenyl-2-propyn-1-one (4 mmol), *O*-Benzylhydroxylamine hydrochloride (8 mmol), anhydrous Na<sub>2</sub>SO<sub>4</sub> (8 mmol), pyridine (1.2 mL), and methanol (15 mL) was stirred at room temperature overnight (reaction monitored by TLC). When the reaction was completed, the reaction was quenched with water (40 mL) and extracted with ethyl acetate (3 × 40 mL). The combined organic layers were washed with brine, dried over anhydrous Na<sub>2</sub>SO<sub>4</sub>, and filtered. After concentration under reduced pressure, the residue was purified by silica gel column chromatography (eluent: PE/EA) to afford the desired products **1a'** in 65% yields.

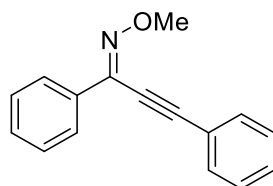

### 1,3-Diphenyl-2-propyn-1-one *O*-methyloxime (**1a**)<sup>3</sup>

Yellow solid, (602 mg, 64%), mp: 42-44 °C. Purified by column chromatography (PE/EA = 100/1, v/v). <sup>1</sup>H NMR (500 MHz, CDCl<sub>3</sub>) δ 7.93-7.91 (m, 2H), 7.63-7.61 (m, 2H), 7.41-7.38 (m, 6H), 4.14 (s, 3H) ppm; <sup>13</sup>C NMR (126 MHz, CDCl<sub>3</sub>) δ 140.0, 133.6, 132.2, 129.7, 129.6, 128.5, 128.4, 126.5, 121.8, 101.2, 79.5, 63.2 ppm; HRMS (ESI) m/z: calcd. for C<sub>16</sub>H<sub>14</sub>NO [M + H]<sup>+</sup> 236.1070, found 236.1080.

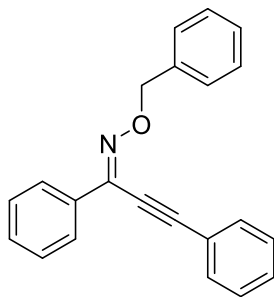

**1,3-Diphenyl-2-propyn-1-one *O*- benzyloxime (1a')<sup>4</sup>**

Colorless oil, (810 mg, 65%). Purified by column chromatography (PE/EA = 50/1, v/v).

<sup>1</sup>H NMR (500 MHz, CDCl<sub>3</sub>) δ 7.91-7.90 (m, 2H), 7.60-7.58 (m, 2H), 7.48-7.46 (m, 2H), 7.41-7.31 (m, 9H), 5.38 (s, 3H) ppm.

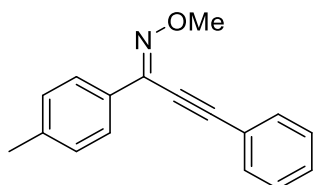

**1-(4-Methylphenyl)-3-phenyl-2-propyn-1-one *O*-methyloxime (1b)<sup>3</sup>**

Yellow oil, (648 mg, 65%). Purified by column chromatography (PE/EA = 70/1, v/v).

<sup>1</sup>H NMR (500 MHz, CDCl<sub>3</sub>) δ 7.80 (d, *J* = 8.0 Hz, 2H), 7.62-7.60 (m, 2H), 7.40-7.36 (m, 3H), 7.20 (d, *J* = 7.5 Hz, 2H), 4.12 (s, 3H), 2.38 (s, 3H) ppm.

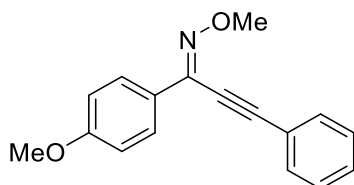

**1-(4-Methoxyphenyl)-3-phenyl-2-propyn-1-one *O*-methyloxime (1c)<sup>2</sup>**

White solid, (626 mg, 59%), mp: 57-59 °C. Purified by column chromatography

(PE/EA = 60/1, v/v). <sup>1</sup>H NMR (500 MHz, CDCl<sub>3</sub>) δ 7.87-7.84 (m, 2H), 7.62-7.60 (m, 2H), 7.40-7.38 (m, 3H), 6.93-6.91 (m, 2H), 4.11 (s, 3H), 3.84 (s, 3H) ppm.

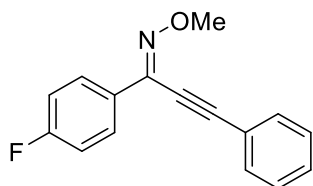

**1-(4-Fluorophenyl)-3-phenyl-2-propyn-1-one *O*-methyloxime (1d)<sup>3</sup>**

Yellow oil, (587 mg, 58%). Purified by column chromatography (PE/EA = 60/1, v/v). <sup>1</sup>H NMR (500 MHz, CDCl<sub>3</sub>)  $\delta$  7.91-7.89 (m, 2H), 7.62-7.60 (m, 2H), 7.41-7.36 (m, 3H), 7.10-7.07 (m, 2H), 4.13 (s, 3H) ppm.

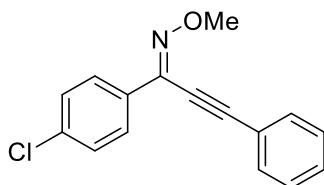

**1-(4-Chlorophenyl)-3-phenyl-2-propyn-1-one *O*-methyloxime (1e)<sup>3</sup>**

Colourless oil, (453 mg, 42%). Purified by column chromatography (PE/EA = 60/1, v/v). <sup>1</sup>H NMR (500 MHz, CDCl<sub>3</sub>)  $\delta$  7.86-7.83 (m, 2H), 7.61-7.60 (m, 2H), 7.40-7.36 (m, 5H), 4.13 (s, 3H) ppm.

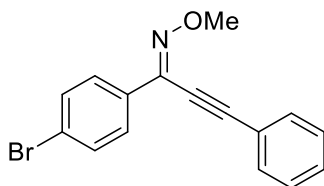

**1-(4-Bromophenyl)-3-phenyl-2-propyn-1-one *O*-methyloxime (1f)<sup>6</sup>**

Yellow solid, (665 mg, 53%), mp: 54-56 °C. Purified by column chromatography (PE/EA = 60/1, v/v). <sup>1</sup>H NMR (500 MHz, CDCl<sub>3</sub>)  $\delta$  7.79-7.77 (m, 2H), 7.61-7.60 (m, 2H), 7.54-7.51 (m, 2H), 7.43-7.36 (m, 3H), 4.13 (s, 3H) ppm.

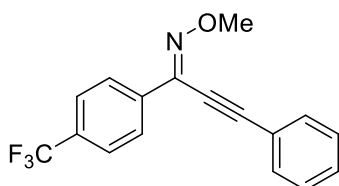

**3-Phenyl-1-[4-(trifluoromethyl)phenyl]-2-propyn-1-one *O*-methyloxime (1g)<sup>3</sup>**

Pale yellow solid, (424 mg, 35%), mp: 58-60 °C. Purified by column chromatography (PE/EA = 60/1, v/v). <sup>1</sup>H NMR (500 MHz, CDCl<sub>3</sub>)  $\delta$  8.03 (d, *J* = 8.5 Hz, 2H), 7.65 (d, *J* = 8.0 Hz, 2H), 7.63-7.61 (m, 2H), 7.43-7.38 (m, 3H), 4.17 (s, 3H) ppm.

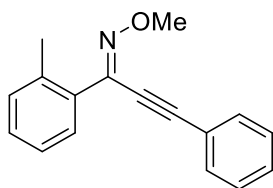

**1-(2-Methylphenyl)-3-phenyl-2-propyn-1-one *O*-methyloxime (1h)<sup>6</sup>**

Yellow oil, (648 mg, 65%). Purified by column chromatography (PE/EA = 60/1, v/v).

<sup>1</sup>H NMR (500 MHz, CDCl<sub>3</sub>)  $\delta$  7.54-7.53 (m, 3H), 7.35-7.33 (m, 3H), 7.29-7.27 (m, 1H), 7.25-7.22 (m, 2H), 4.12 (s, 3H), 2.54 (s, 3H) ppm.

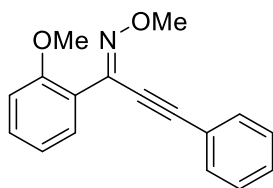

**1-(2-Methoxyphenyl)-3-phenyl-2-propyn-1-one *O*-methyloxime (1i)<sup>3</sup>**

Yellow oil, (795 mg, 75%). Purified by column chromatography (PE/EA = 10/1, v/v).

<sup>1</sup>H NMR (500 MHz, CDCl<sub>3</sub>)  $\delta$  7.54-7.51 (m, 2H), 7.50-7.48 (m, 1H), 7.37-7.32 (m, 4H), 7.01-6.95 (m, 2H), 4.12 (s, 3H), 3.88 (s, 3H) ppm.

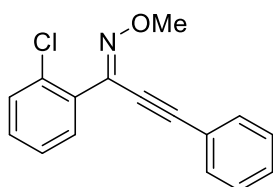

**1-(2-Chlorophenyl)-3-phenyl-2-propyn-1-one *O*-methyloxime (1j)<sup>1</sup>**

Pale yellow oil, (485 mg, 45%). Purified by column chromatography (PE/EA = 60/1, v/v).

<sup>1</sup>H NMR (500 MHz, CDCl<sub>3</sub>)  $\delta$  7.55-7.52 (m, 3H), 7.45-7.44 (m, 1H), 7.37-7.31 (m, 5H), 4.14 (s, 3H) ppm.

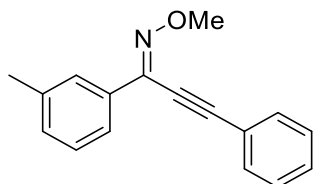

**1-(3-Methylphenyl)-3-phenyl-2-propyn-1-one *O*-methyloxime (1k)<sup>6</sup>**

Yellow oil, (618 mg, 62%). Purified by column chromatography (PE/EA = 60/1, v/v).  $^1\text{H}$  NMR (500 MHz,  $\text{CDCl}_3$ )  $\delta$  7.72-7.70 (m, 2H), 7.63-7.61 (m, 2H), 7.40-7.36 (m, 3H), 7.31-7.28 (m, 1H), 7.22-7.20 (m, 1H), 4.14 (s, 3H), 2.40 (s, 3H) ppm.

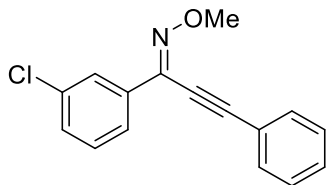

**1-(3-Chlorophenyl)-3-phenyl-2-propyn-1-one *O*-methyloxime (1l)<sup>6</sup>**

Yellow oil, (539 mg, 50%). Purified by column chromatography (PE/EA = 40/1, v/v).  $^1\text{H}$  NMR (500 MHz,  $\text{CDCl}_3$ )  $\delta$  7.91-7.90 (m, 1H), 7.80-7.78 (m, 1H), 7.62-7.60 (m, 2H), 7.39-7.31 (m, 5H), 4.14 (s, 3H) ppm.

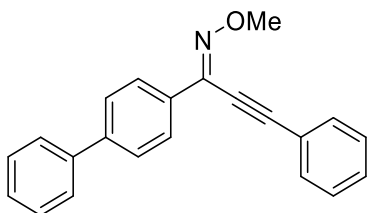

**1-[1,1'-Biphenyl]-4-yl-3-phenyl-2-propyn-1-one *O*-methyloxime (1m)<sup>1</sup>**

White solid, (497 mg, 40%), mp: 111-113 °C. Purified by column chromatography (PE/EA = 80/1, v/v).  $^1\text{H}$  NMR (500 MHz,  $\text{CDCl}_3$ )  $\delta$  8.00-7.98 (m, 2H), 7.64-7.61 (m, 6H), 7.46-7.43 (m, 2H), 7.40-7.36 (m, 4H), 4.16 (s, 3H) ppm.

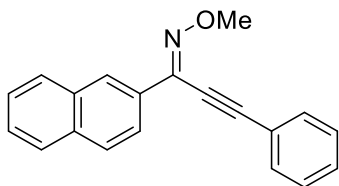

**1-(2-Naphthalenyl)-3-phenyl-2-propyn-1-one *O*-methyloxime (1n)<sup>6</sup>**

Pale yellow solid, (536 mg, 47%), mp: 107-109 °C. Purified by column chromatography (PE/EA = 60/1, v/v).  $^1\text{H}$  NMR (500 MHz,  $\text{CDCl}_3$ )  $\delta$  8.34 (s, 1H), 8.08-8.06 (m, 1H), 7.91-7.89 (m, 1H), 7.84-7.82 (m, 2H), 7.68-7.66 (m, 2H), 7.51-7.47 (m, 2H), 7.42-7.37 (m, 3H), 4.18 (s, 3H) ppm.



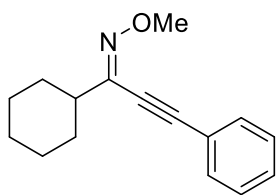

**1-Cyclohexyl-3-phenyl-2-propyn-1-one *O*-methyloxime (1o)<sup>1</sup>**

Yellow oil, (512 mg, 53%). Purified by column chromatography (PE/EA = 50/1, v/v).

<sup>1</sup>H NMR (500 MHz, CDCl<sub>3</sub>)  $\delta$  7.54-7.52 (m, 2H), 7.36-7.34 (m, 3H), 3.96 (s, 3H), 2.44-2.38 (m, 1H), 1.90-1.78 (m, 4H), 1.72-1.68 (m, 1H), 1.53-1.47 (m, 2H), 1.37-1.29 (m, 2H), 1.25-1.20 (m, 1H) ppm.

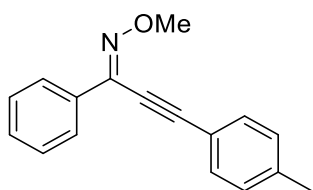

**3-(4-Methylphenyl)-1-phenyl-2-propyn-1-one *O*-methyloxime (1p)<sup>3</sup>**

Yellow oil, (688 mg, 69%). Purified by column chromatography (PE/EA = 60/1, v/v).

<sup>1</sup>H NMR (500 MHz, CDCl<sub>3</sub>)  $\delta$  7.92-7.90 (m, 2H), 7.52-7.50 (m, 2H), 7.40-7.39 (m, 3H), 7.18 (d,  $J$  = 8.0 Hz, 2H), 4.14 (s, 3H), 2.38 (s, 3H) ppm.

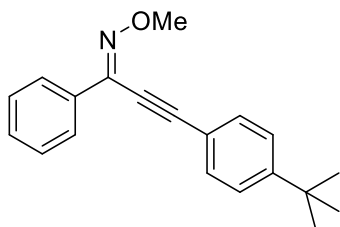

**3-[4-(1,1-Dimethylethyl)phenyl]-1-phenyl-2-propyn-1-one *O*-methyloxime (1q)<sup>6</sup>**

Pale yellow oil, (816 mg, 70%). Purified by column chromatography (PE/EA = 50/1, v/v).

<sup>1</sup>H NMR (500 MHz, CDCl<sub>3</sub>)  $\delta$  7.93-7.91 (m, 2H), 7.56-7.53 (m, 2H), 7.40-7.38 (m, 5H), 4.13 (s, 3H), 1.32 (s, 9H) ppm.

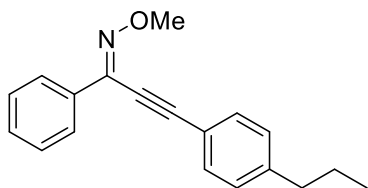

### 3-(4-Propylphenyl)-1-phenyl-2-propyn-1-one *O*-methyloxime (1r)<sup>7</sup>

Yellow oil, (843 mg, 76%). Purified by column chromatography (PE/EA = 50/1, v/v). <sup>1</sup>H NMR (500 MHz, CDCl<sub>3</sub>) δ 7.93-7.91 (m, 2H), 7.53-7.51 (m, 2H), 7.40-7.36 (m, 3H), 7.17 (d, *J* = 8.5 Hz, 2H), 4.13 (s, 3H), 2.59 (t, *J* = 7.5 Hz, 2H), 1.67-1.59 (m, 2H), 0.92 (t, *J* = 7.5 Hz, 3H) ppm.

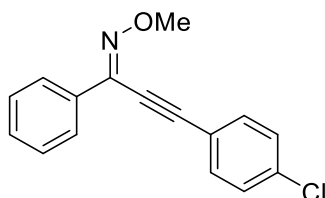

### 3-(4-Chlorophenyl)-1-phenyl-2-propyn-1-one *O*-methyloxime (1s)<sup>6</sup>

Pale yellow solid, (615 mg, 57%), mp: 40-42 °C. Purified by column chromatography (PE/EA = 40/1, v/v). <sup>1</sup>H NMR (500 MHz, CDCl<sub>3</sub>) δ 7.90-7.88 (m, 2H), 7.53-7.51 (m, 2H), 7.40-7.38 (m, 3H), 7.35-7.32 (m, 2H), 4.13 (s, 3H) ppm.

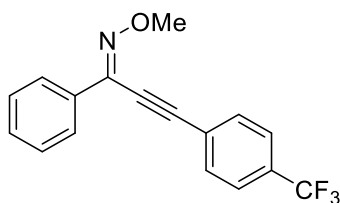

### 1-Phenyl-3-[4-(trifluoromethyl)phenyl]-2-propyn-1-one *O*-methyloxime (1t)<sup>6</sup>

Yellow oil, (630 mg, 52%). Purified by column chromatography (PE/EA = 40/1, v/v). <sup>1</sup>H NMR (500 MHz, CDCl<sub>3</sub>) δ 7.91-7.89 (m, 2H), 7.70 (d, *J* = 8.0 Hz, 2H), 7.62 (d, *J* = 8.5 Hz, 2H), 7.41-7.39 (m, 3H), 4.14 (s, 3H) ppm.

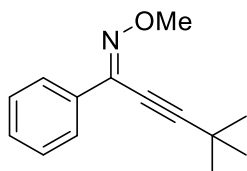

### 4,4-Dimethyl-1-phenyl-2-pentyn-1-one *O*-methyloxime (1u)<sup>8</sup>

Colourless oil, (629 mg, 73%). Purified by column chromatography (PE/EA = 20/1, v/v). <sup>1</sup>H NMR (500 MHz, CDCl<sub>3</sub>) δ 7.84-7.82 (m, 2H), 7.35-7.34 (m, 3H), 4.06 (s, 3H), 1.37 (s, 9H) ppm.

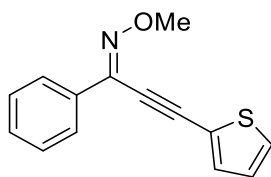

### 1-Phenyl-3-(2-thienyl)-2-propyn-1-one *O*-methyloxime (1v)<sup>9</sup>

Brown oil, (579 mg, 60%). Purified by column chromatography (PE/EA = 50/1, v/v). <sup>1</sup>H NMR (500 MHz, CDCl<sub>3</sub>) δ 7.89-7.87 (m, 2H), 7.43-7.42 (m, 1H), 7.40-7.39 (m, 4H), 7.05-7.03 (m, 1H), 4.13 (s, 3H) ppm.

## 3. Preparation of *N*-thiocyanato-dibenzenesulfonimide

Reagents **2d** were prepared according to the literatures.<sup>10</sup>

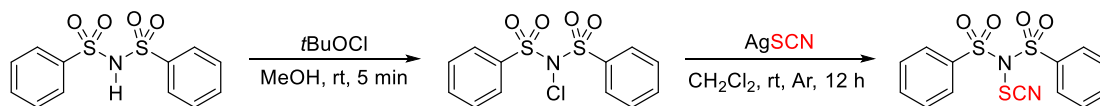

*N*-(Phenylsulfonyl)benzenesulfonamide (9.0 g, 30.30 mmol) and tert-butyl hypochlorite (33.33 mmol, 1.1 equiv) were stirred in methanol (50 mL) for 5 min at room temperature. Then the suspension was filtered giving the *N*-chloro-*N*-(phenylsulfonyl)-benzenesulfonamide as a white powder. *N*-chloro-*N*-(phenylsulfonyl)-benzenesulfonamide (2.6 g, 7.9 mmol) was treated with AgSCN (2 g, 11.9 mmol, 1.5 equiv) in CH<sub>2</sub>Cl<sub>2</sub> (25.0 mL) for 12 h at room temperature.. Then the reaction mixture was filtered, and the filtrate was concentrated under reduced pressure to afford the product.

## 4. General Procedure for the Synthesis of **3**

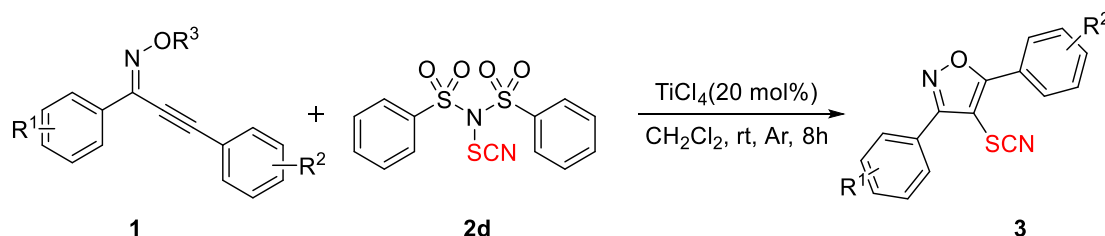

A 25 mL reaction tube was charged with substrate **1a-1v** (0.10 mmol, 1.0 equiv) and TiCl<sub>4</sub> (0.02 mmol, 0.2 equiv) under an argon atmosphere. The mixture was

dissolved in anhydrous DCM (0.5 mL). *N*-Thiocyanato-dibenzenesulfonimide (1.50 mmol, 1.5 equiv) was added to the reaction mixture. The resulting solution was stirred at room temperature until the reaction was complete, as monitored by TLC. Upon completion, the crude mixture was purified by column chromatography on silica gel using PE/*i*Pr<sub>2</sub>O as the eluent to afford products **3a-3v**.

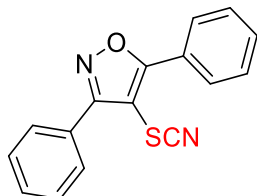

### 3,5-Diphenyl-4-thiocyanatoisoxazole (**3a**)

Purified by column chromatography (PE/*i*Pr<sub>2</sub>O = 30/1, v/v), TLC *R<sub>f</sub>* = 0.3, white solid (23.4 mg, 84%), mp: 169-171 °C. <sup>1</sup>H NMR (500 MHz, CDCl<sub>3</sub>) δ 8.08-8.06 (m, 2H), 7.86-7.84 (m, 2H), 7.61-7.57 (m, 6H) ppm; <sup>13</sup>C NMR (126 MHz, CDCl<sub>3</sub>) δ 173.7, 164.1, 132.1, 130.8, 129.3, 129.1, 128.8, 128.0, 126.8, 125.6, 109.5, 93.4 ppm; IR (KBr) 2922, 2160 (SCN), 912 cm<sup>-1</sup>; HRMS (ESI) *m/z*: calcd. for C<sub>16</sub>H<sub>11</sub>N<sub>2</sub>OS [M + H]<sup>+</sup> 279.0587, found 279.0594.

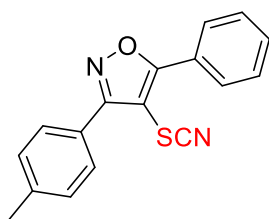

### 3-(4-Methylcyclohexa-1,5-dien-1-yl)-5-phenyl-4-thiocyanatoisoxazole (**3b**)

Purified by column chromatography (PE/*i*Pr<sub>2</sub>O = 10/1, v/v), TLC *R<sub>f</sub>* = 0.5, white solid (28.2 mg, 96%), mp: 127-129 °C. <sup>1</sup>H NMR (500 MHz, CDCl<sub>3</sub>) δ 8.08-8.06 (m, 2H), 7.75 (d, *J* = 8.0 Hz, 2H), 7.61-7.59 (m, 3H), 7.38 (d, *J* = 7.5 Hz, 2H), 2.46 (s, 3H) ppm; <sup>13</sup>C NMR (126 MHz, CDCl<sub>3</sub>) δ 173.6, 164.1, 141.1, 132.0, 129.8, 129.3, 128.6, 128.0, 125.7, 123.9, 109.6, 93.3, 21.5 ppm; IR (KBr) 2924, 2158 (SCN), 1660, 1581, 1377, 812, 736 cm<sup>-1</sup>; HRMS (ESI) *m/z*: calcd. for C<sub>17</sub>H<sub>13</sub>N<sub>2</sub>OS [M + H]<sup>+</sup> 293.0744, found 293.0757.

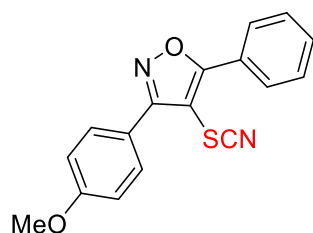

### 3-(4-Methoxyphenyl)-5-phenyl-4-thiocyanatoisoxazole (3c)

Purified by column chromatography (PE/*i*Pr<sub>2</sub>O = 8/1, v/v), TLC *R<sub>f</sub>* = 0.5, white solid (27.1 mg, 88%), mp: 161-163°C. <sup>1</sup>H NMR (500 MHz, CDCl<sub>3</sub>) δ 8.07-8.05 (m, 2H), 7.83 (d, *J* = 8.5 Hz, 2H), 7.61-7.60 (m, 3H), 7.08 (d, *J* = 8.5 Hz, 2H), 3.90 (s, 3H) ppm; <sup>13</sup>C NMR (126 MHz, CDCl<sub>3</sub>) δ 173.6, 163.7, 161.6, 132.0, 130.2, 129.3, 128.1, 125.7, 119.0, 114.6, 109.7, 93.2, 55.5 ppm; IR (KBr) 2924, 2351, 2158 (SCN), 1606, 1382, 1255 cm<sup>-1</sup>; HRMS (ESI) *m/z*: calcd. for C<sub>17</sub>H<sub>13</sub>N<sub>2</sub>O<sub>2</sub>S [M + H]<sup>+</sup> 309.0693, found 309.0694.

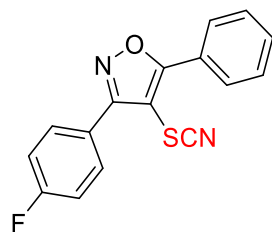

### 3-(4-Fluorophenyl)-5-phenyl-4-thiocyanatoisoxazole (3d)

Purified by column chromatography (PE/*i*Pr<sub>2</sub>O = 6/1, v/v), TLC *R<sub>f</sub>* = 0.5, White solid (23.4 mg, 79%), mp: 130-132 °C. <sup>1</sup>H NMR (500 MHz, CDCl<sub>3</sub>) δ 8.07-8.05 (m, 2H), 7.88-7.86 (m, 2H), 7.63-7.60 (m, 3H), 7.27-7.25 (m, 2H) ppm; <sup>13</sup>C NMR (126 MHz, CDCl<sub>3</sub>) δ 173.8, 164.3 (d, *J* = 253.3 Hz), 163.3, 132.2, 130.8 (d, *J* = 8.8 Hz), 129.3, 128.0, 125.5, 122.9 (d, *J* = 3.8 Hz), 116.4 (d, *J* = 22.7 Hz), 109.4, 93.3 ppm; <sup>19</sup>F NMR (471 MHz, CDCl<sub>3</sub>) δ -108.8 ppm; IR (KBr) 2920, 2351, 2160 (SCN), 1556, 1417, 1236, 840 cm<sup>-1</sup>; HRMS (ESI) *m/z*: calcd. for C<sub>16</sub>H<sub>10</sub>FN<sub>2</sub>OS [M + H]<sup>+</sup> 297.0493, found 297.0492.

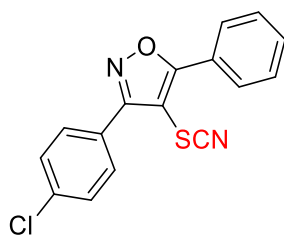

### 3-(4-Chlorophenyl)-5-phenyl-4-thiocyanatoisoxazole (3e)

Purified by column chromatography (PE/ *i*Pr<sub>2</sub>O = 6/1, v/v), TLC *R<sub>f</sub>* = 0.4, white solid (25.0 mg, 80%), mp: 102-104 °C. <sup>1</sup>H NMR (500 MHz, CDCl<sub>3</sub>) δ 8.07-8.05 (m, 2H), 7.83-7.80 (m, 2H), 7.65-7.58 (m, 3H), 7.57-7.54 (m, 2H) ppm; <sup>13</sup>C NMR (126 MHz, CDCl<sub>3</sub>) δ 174.0, 163.2, 137.3, 132.3, 130.0, 129.5, 129.3, 128.1, 125.5, 125.3, 109.3, 93.3 ppm; IR (KBr) 2829, 2351, 2158 (SCN), 1598, 1352, 1091, 831 cm<sup>-1</sup>; HRMS (ESI) *m/z*: calcd. for C<sub>16</sub>H<sub>10</sub>ClN<sub>2</sub>OS [M + H]<sup>+</sup> 313.0197, found 313.0206.

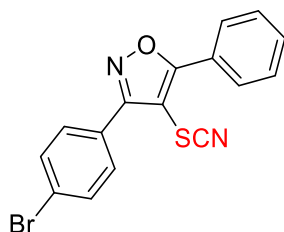

### 3-(4-Bromophenyl)-5-phenyl-4-thiocyanatoisoxazole (3f)

Purified by column chromatography (PE/ *i*Pr<sub>2</sub>O = 6/1, v/v), TLC *R<sub>f</sub>* = 0.4, white solid (26.8 mg, 75%), mp: 117-119 °C. <sup>1</sup>H NMR (500 MHz, CDCl<sub>3</sub>) δ 8.07-8.05 (m, 2H), 7.76-7.70 (m, 4H), 7.65-7.59 (m, 3H) ppm; <sup>13</sup>C NMR (126 MHz, CDCl<sub>3</sub>) δ 174.0, 163.2, 132.4, 132.3, 130.2, 129.3, 128.0, 125.7, 125.6, 125.4, 109.3, 93.2 ppm; IR (KBr) 2829, 2351, 2160 (SCN), 1593, 1352, 1105 cm<sup>-1</sup>; HRMS (ESI) *m/z*: calcd. for C<sub>16</sub>H<sub>10</sub>BrN<sub>2</sub>OS [M + H]<sup>+</sup> 356.9692, found 356.9691.

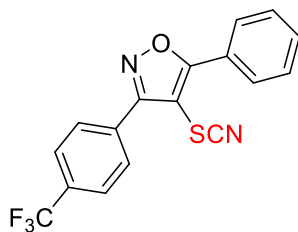

### 5-Phenyl-4-thiocyanato-3-(4-(trifluoromethyl)phenyl)isoxazole (3g)

Purified by column chromatography (PE/*i*Pr<sub>2</sub>O = 6/1, v/v), TLC *R<sub>f</sub>* = 0.4, white solid (29.4 mg, 85%), mp: 83-85 °C. <sup>1</sup>H NMR (500 MHz, CDCl<sub>3</sub>) δ 8.09-8.07 (m, 2H), 8.01 (d, *J* = 8.0 Hz, 2H), 7.85 (d, *J* = 8.0 Hz, 2H), 7.65-7.61 (m, 3H) ppm; <sup>13</sup>C NMR (126 MHz, CDCl<sub>3</sub>) δ 174.2, 163.1, 132.8 (q, *J* = 32.8 Hz), 132.4, 130.4, 129.4, 129.2, 128.1, 126.1 (q, *J* = 3.8 Hz), 125.3, 123.7 (q, *J* = 273.4 Hz), 109.2, 93.4 ppm; <sup>19</sup>F NMR (471 MHz, CDCl<sub>3</sub>) δ -63.0 ppm; IR (KBr) 2929, 2351, 2160 (SCN), 1589, 1325, 1126, 1068, 844 cm<sup>-1</sup>; HRMS (ESI) *m/z*: calcd. for C<sub>17</sub>H<sub>10</sub>F<sub>3</sub>N<sub>2</sub>OS [M + H]<sup>+</sup> 347.0461, found 347.0460.

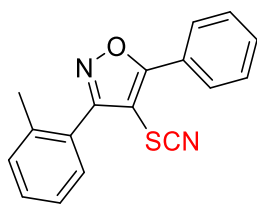

### 5-Phenyl-4-thiocyanato-3-(*o*-tolyl)isoxazole (3h)

Purified by column chromatography (PE/*i*Pr<sub>2</sub>O = 6/1, v/v), TLC *R<sub>f</sub>* = 0.5, pale yellow solid (24.0 mg, 82%), mp: 166-168 °C. <sup>1</sup>H NMR (500 MHz, CDCl<sub>3</sub>) δ 8.13-8.11 (m, 2H), 7.62-7.60 (m, 3H), 7.47-7.45 (m, 1H), 7.40-7.37 (m, 3H), 2.36 (s, 3H) ppm; <sup>13</sup>C NMR (126 MHz, CDCl<sub>3</sub>) δ 172.6, 165.4, 137.6, 132.1, 130.9, 130.5, 130.1, 129.3, 127.9, 126.1, 126.0, 125.7, 109.0, 94.8, 20.0 ppm; IR (KBr) 2814, 2351, 2318, 2158 (SCN), 1593, 1377, 1350, 1111, 734 cm<sup>-1</sup>; HRMS (ESI) *m/z*: calcd. for C<sub>17</sub>H<sub>13</sub>N<sub>2</sub>OS [M + H]<sup>+</sup> 293.0744, found 293.0750.

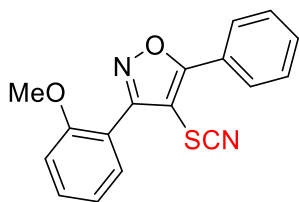

### 3-(2-Methoxyphenyl)-5-phenyl-4-thiocyanatoisoxazole (3i)

Purified by column chromatography (PE/*i*Pr<sub>2</sub>O = 4/1, v/v), TLC *R<sub>f</sub>* = 0.5, white solid (24.1 mg, 78%), mp: 153-155 °C. <sup>1</sup>H NMR (500 MHz, CDCl<sub>3</sub>) δ 8.13-8.11 (m, 2H), 7.61-7.59 (m, 3H), 7.57-7.50 (m, 2H), 7.14-7.07 (m, 2H), 3.91 (s, 3H) ppm; <sup>13</sup>C NMR (126 MHz, CDCl<sub>3</sub>) δ 171.9, 163.7, 157.2, 132.5, 131.9, 131.2, 129.2, 127.9, 125.9, 121.1, 115.7, 111.1, 109.9, 95.8, 55.6 ppm; IR (KBr) 2937, 2308, 2158 (SCN), 1604,

1384, 1249, 1112, 750, 617  $\text{cm}^{-1}$ ; HRMS (ESI)  $m/z$ : calcd. for  $\text{C}_{17}\text{H}_{13}\text{N}_2\text{O}_2\text{S}$   $[\text{M} + \text{H}]^+$  309.0693 found 309.0699.

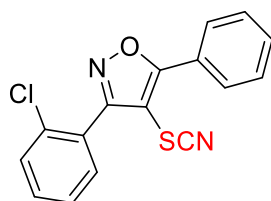

### 3-(2-Chlorophenyl)-5-phenyl-4-thiocyanatoisoxazole (3j)

Purified by column chromatography (PE/  $i\text{Pr}_2\text{O}$  = 6/1, v/v), TLC  $R_f$  = 0.4, white solid (22.8 mg, 73%), mp: 98-100  $^{\circ}\text{C}$ .  $^1\text{H}$  NMR (500 MHz,  $\text{CDCl}_3$ )  $\delta$  8.13-8.11 (m, 2H), 7.61-7.57 (m, 4H), 7.55-7.51 (m, 2H), 7.47-7.44 (m, 1H) ppm;  $^{13}\text{C}$  NMR (126 MHz,  $\text{CDCl}_3$ )  $\delta$  172.5, 164.0, 133.8, 132.2, 132.1, 131.8, 130.1, 129.3, 127.8, 127.3, 126.0, 125.5, 109.0, 95.4 ppm; IR (KBr) 2816, 2351, 2310, 2160 (SCN), 1585, 1384, 1130, 1064, 759  $\text{cm}^{-1}$ ; HRMS (ESI)  $m/z$ : calcd. for  $\text{C}_{16}\text{H}_{10}\text{ClN}_2\text{OS}$   $[\text{M} + \text{H}]^+$  313.0197, found 313.0203.

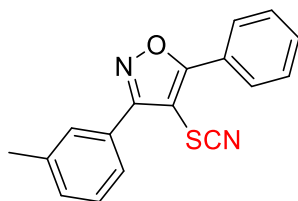

### 5-Phenyl-4-thiocyanato-3-(*m*-tolyl)isoxazole (3k)

Purified by column chromatography (PE/  $i\text{Pr}_2\text{O}$  = 9/1, v/v), TLC  $R_f$  = 0.4, pale yellow solid (26.0 mg, 89%), mp: 144-146  $^{\circ}\text{C}$ .  $^1\text{H}$  NMR (500 MHz,  $\text{CDCl}_3$ )  $\delta$  8.08-8.06 (m, 2H), 7.66-7.64 (m, 2H), 7.62-7.59 (m, 3H), 7.48-7.44 (m, 1H), 7.38 (d,  $J$  = 7.5 Hz, 1H), 2.47 (s, 3H) ppm;  $^{13}\text{C}$  NMR (126 MHz,  $\text{CDCl}_3$ )  $\delta$  173.6, 164.3, 139.0, 132.1, 131.6, 129.4, 129.3, 129.0, 128.1, 126.7, 125.9, 125.7, 109.6, 93.4, 21.5 ppm; IR (KBr) 2920, 2351, 2308, 2158 (SCN), 1583, 1556, 1384, 1136, 727, 688  $\text{cm}^{-1}$ ; HRMS (ESI)  $m/z$ : calcd. for  $\text{C}_{17}\text{H}_{13}\text{N}_2\text{OS}$   $[\text{M} + \text{H}]^+$  293.0744, found 293.0749.

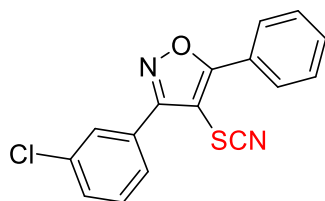



### 3-(3-Chlorophenyl)-5-phenyl-4-thiocyanatoisoxazole (3l)

Purified by column chromatography (PE/ *i*Pr<sub>2</sub>O = 6/1, v/v), TLC *R<sub>f</sub>* = 0.5, pale yellow solid (23.8 mg, 76%), mp: 79-81 °C. <sup>1</sup>H NMR (500 MHz, CDCl<sub>3</sub>) δ 8.07-8.06 (m, 2H), 7.86-7.85 (m, 1H), 7.78-7.76 (m, 1H), 7.63-7.60 (m, 3H), 7.57-7.50 (m, 2H) ppm; <sup>13</sup>C NMR (126 MHz, CDCl<sub>3</sub>) δ 174.0, 163.0, 135.2, 132.3, 131.0, 130.4, 129.4, 128.8, 128.5, 128.1, 126.9, 125.4, 109.2, 93.4 ppm; IR (KBr) 3082, 2362, 2160 (SCN), 1575, 1386, 1350, 1097, 769, 727, 686, 619 cm<sup>-1</sup>; HRMS (ESI) *m/z*: calcd. for C<sub>16</sub>H<sub>10</sub>ClN<sub>2</sub>OS [M + H]<sup>+</sup> 313.0197, found 313.0204.

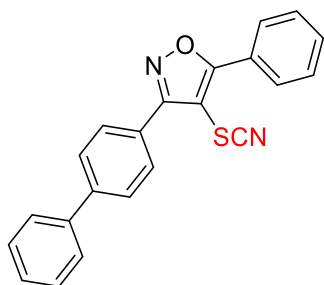

### 3-([1,1'-Biphenyl]-4-yl)-5-phenyl-4-thiocyanatoisoxazole (3m)

Purified by column chromatography (PE/ *i*Pr<sub>2</sub>O = 9/1, v/v), TLC *R<sub>f</sub>* = 0.4, white solid (28.0 mg, 79%), mp: 187-190 °C. <sup>1</sup>H NMR (500 MHz, CDCl<sub>3</sub>) δ 8.10-8.08 (m, 2H), 7.96 (d, *J* = 8.5 Hz, 2H), 7.80 (d, *J* = 8.5 Hz, 2H), 7.68 (d, *J* = 7.0 Hz, 2H), 7.63-7.62 (m, 3H), 7.51-7.48 (m, 2H), 7.43-7.40 (m, 1H) ppm; <sup>13</sup>C NMR (126 MHz, CDCl<sub>3</sub>) δ 173.8, 163.8, 143.7, 140.0, 132.1, 129.3, 129.1, 129.0, 128.1, 128.0, 127.8, 127.3, 125.6, 125.5, 109.6, 93.4 ppm; IR (KBr) 2848, 2351, 2154 (SCN), 1593, 1377, 736 cm<sup>-1</sup>; HRMS (ESI) *m/z*: calcd. for C<sub>22</sub>H<sub>15</sub>N<sub>2</sub>OS [M + H]<sup>+</sup> 355.0900, found 355.0904.

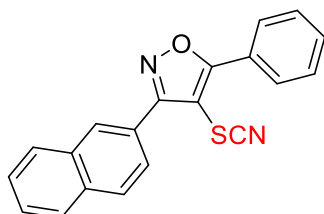

### 3-(Naphthalen-2-yl)-5-phenyl-4-thiocyanatoisoxazole (3n)

Purified by column chromatography (PE/ *i*Pr<sub>2</sub>O = 9/1, v/v), TLC *R<sub>f</sub>* = 0.4, white solid (23.0 mg, 70%), mp: 163-165 °C. <sup>1</sup>H NMR (500 MHz, CDCl<sub>3</sub>) δ 8.41 (s, 1H), 8.12-

8.10 (m, 2H), 8.04-7.99 (m, 2H), 7.95-7.92 (m, 2H), 7.64-7.59 (m, 5H) ppm;  $^{13}\text{C}$  NMR (126 MHz,  $\text{CDCl}_3$ )  $\delta$  173.9, 164.1, 134.2, 133.0, 132.2, 129.3, 129.1, 129.0, 128.8, 128.1, 127.9, 127.7, 127.0, 125.6, 125.2, 124.1, 109.6, 93.5 ppm; IR (KBr) 3057, 2918, 2358, 2341, 2158 (SCN), 1647, 1558, 1394, 750  $\text{cm}^{-1}$ ; HRMS (ESI)  $m/z$ : calcd. for  $\text{C}_{20}\text{H}_{13}\text{N}_2\text{OS}$   $[\text{M} + \text{H}]^+$  329.0744, found 329.0746.

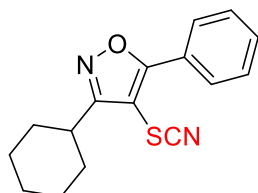

### 3-Cyclohexyl-5-phenyl-4-thiocyanatoisoxazole (3o)

Purified by column chromatography (PE/ $i$ Pr $_2$ O = 15/1, v/v), TLC  $R_f$  = 0.4, colourless oil (23.8 mg, 84%).  $^1\text{H}$  NMR (500 MHz,  $\text{CDCl}_3$ )  $\delta$  8.02-8.00 (m, 2H), 7.58-7.56 (m, 3H), 2.98-2.92 (m, 1H), 2.11-2.08 (m, 2H), 1.94-1.90 (m, 2H), 1.82-1.78 (m, 1H), 1.74-1.66 (m, 2H), 1.51-1.42 (m, 2H), 1.39-1.33 (m, 1H) ppm;  $^{13}\text{C}$  NMR (126 MHz,  $\text{CDCl}_3$ )  $\delta$  172.4, 169.1, 131.8, 129.2, 127.9, 125.8, 109.5, 92.9, 35.8, 31.2, 26.15, 25.8 ppm; IR (KBr) 2929, 2852, 2351, 2158 (SCN), 1564, 1446, 688  $\text{cm}^{-1}$ ; HRMS (ESI)  $m/z$ : calcd. for  $\text{C}_{16}\text{H}_{17}\text{N}_2\text{OS}$   $[\text{M} + \text{H}]^+$  285.1057, found 285.1068.

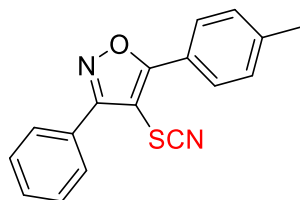

### 3-Phenyl-4-thiocyanato-5-(*p*-tolyl)isoxazole (3p)

Purified by column chromatography (PE/ $i$ Pr $_2$ O = 9/1, v/v), TLC  $R_f$  = 0.5, white solid (27.2 mg, 93%), mp: 137-139  $^{\circ}\text{C}$ .  $^1\text{H}$  NMR (500 MHz,  $\text{CDCl}_3$ )  $\delta$  7.98 (d,  $J$  = 7.5 Hz, 2H), 7.85-7.84 (m, 2H), 7.58-7.56 (m, 3H), 7.40 (d,  $J$  = 8.0 Hz, 2H), 2.47 (s, 3H) ppm;  $^{13}\text{C}$  NMR (126 MHz,  $\text{CDCl}_3$ )  $\delta$  173.8, 164.1, 142.9, 130.7, 130.0, 129.1, 128.8, 127.9, 126.9, 122.8, 109.7, 92.6, 21.7 ppm; IR (KBr) 2954, 2924, 2848, 2362, 2322, 2158 (SCN), 1635, 1608, 1386, 1109  $\text{cm}^{-1}$ ; HRMS (ESI)  $m/z$ : calcd. for  $\text{C}_{17}\text{H}_{13}\text{N}_2\text{OS}$   $[\text{M} + \text{H}]^+$  293.0744, found 293.0753.

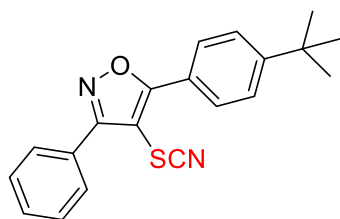

### 5-(4-(tert-Butyl)phenyl)-3-phenyl-4-thiocyanatoisoxazole (3q)

Purified by column chromatography (PE/ *i*Pr<sub>2</sub>O = 10/1, v/v), TLC *R<sub>f</sub>* = 0.4, white solid (30.1 mg, 90%), mp: 133-135 °C. <sup>1</sup>H NMR (500 MHz, CDCl<sub>3</sub>) δ 8.03 (d, *J* = 8.5 Hz, 2H), 7.86-7.85 (m, 2H), 7.62 (d, *J* = 8.5 Hz, 2H), 7.58-7.56 (m, 3H), 1.39 (s, 9H) ppm; <sup>13</sup>C NMR (126 MHz, CDCl<sub>3</sub>) δ 173.8, 164.1, 155.8, 130.7, 129.0, 128.8, 127.8, 126.9, 126.3, 122.8, 109.7, 92.6, 35.2, 31.1 ppm; IR (KBr) 2964, 2808, 2351, 2158 (SCN), 1608, 1573, 1381, 1269, 839, 721, 694 cm<sup>-1</sup>; HRMS (ESI) *m/z*: calcd. for C<sub>20</sub>H<sub>19</sub>N<sub>2</sub>OS [M + H]<sup>+</sup> 335.1213, found 335.1216.

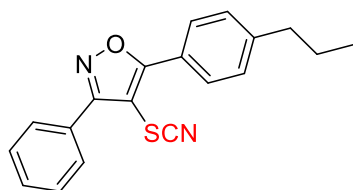

### 3-Phenyl-5-(4-propylphenyl)-4-thiocyanatoisoxazole (3r)

Purified by column chromatography (PE/ *i*Pr<sub>2</sub>O = 10/1, v/v), TLC *R<sub>f</sub>* = 0.4, white solid (29.5mg, 92%), mp: 140-142 °C. <sup>1</sup>H NMR (500 MHz, CDCl<sub>3</sub>) δ 8.00 (d, *J* = 8.0 Hz, 2H), 7.86-7.84 (m, 2H), 7.58-7.55 (m, 3H), 7.40 (d, *J* = 8.0 Hz, 2H), 2.70 (t, *J* = 7.5 Hz, 2H), 1.75-1.68 (m, 2H), 0.99 (t, *J* = 7.5 Hz, 3H) ppm; <sup>13</sup>C NMR (126 MHz, CDCl<sub>3</sub>) δ 173.8, 164.1, 147.5, 130.7, 129.4, 129.1, 128.8, 127.9, 126.9, 123.0, 109.7, 92.6, 38.0, 24.2, 13.8 ppm; IR (KBr) 2960, 2935, 2349, 2158 (SCN), 1608, 1384, 1350, 1118, 694 cm<sup>-1</sup>; HRMS (ESI) *m/z*: calcd. for C<sub>19</sub>H<sub>17</sub>N<sub>2</sub>OS [M + H]<sup>+</sup> 321.1057, found 321.1070.

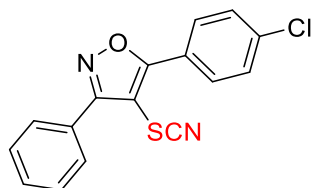

### 5-(4-Chlorophenyl)-3-phenyl-4-thiocyanatoisoxazole (3s)

Purified by column chromatography (PE/*i*Pr<sub>2</sub>O = 9/1, v/v), TLC *R<sub>f</sub>* = 0.5, white solid (25.0 mg, 80%), mp: 167-169 °C. <sup>1</sup>H NMR (500 MHz, CDCl<sub>3</sub>) δ 8.05-8.02 (m, 2H), 7.85-7.83 (m, 2H), 7.60-7.56 (m, 5H) ppm; <sup>13</sup>C NMR (126 MHz, CDCl<sub>3</sub>) δ 172.5, 164.2, 138.6, 130.9, 129.7, 129.2, 129.1, 128.7, 126.6, 124.0, 109.2, 93.8 ppm; IR (KBr) 2926, 2814, 2351, 2320, 2160 (SCN), 1597, 1487, 1381, 1093, 1014, 833, 732 cm<sup>-1</sup>; HRMS (ESI) *m/z*: calcd. for C<sub>16</sub>H<sub>10</sub>ClN<sub>2</sub>OS [M + H]<sup>+</sup> 313.0197, found 313.0204.

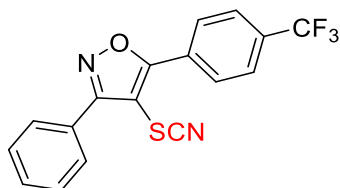

### 3-Phenyl-4-thiocyanato-5-(4-(trifluoromethyl)phenyl)isoxazole (3t)

Purified by column chromatography (PE/*i*Pr<sub>2</sub>O = 10/1, v/v), TLC *R<sub>f</sub>* = 0.3, colourless oil (21.8 mg, 63%). <sup>1</sup>H NMR (500 MHz, CDCl<sub>3</sub>) δ 8.21 (d, *J* = 8.0 Hz, 2H), 7.89-7.84 (m, 4H), 7.59-7.58 (m, 3H) ppm; <sup>13</sup>C NMR (126 MHz, CDCl<sub>3</sub>) δ 172.0, 164.3, 133.7 (q, *J* = 32.8 Hz), 131.1, 129.2, 128.8, 128.4, 126.3 (q, *J* = 3.8 Hz), 123.5 (q, *J* = 173.4 Hz), 108.9, 95.1 ppm; <sup>19</sup>F NMR (471 MHz, CDCl<sub>3</sub>) δ -63.2 ppm; IR (KBr) 2937, 2818, 2160 (SCN), 1587, 1382, 1323, 1170, 1128, 1068, 1016, 846 cm<sup>-1</sup>; HRMS (ESI) *m/z*: calcd. for C<sub>17</sub>H<sub>10</sub>F<sub>3</sub>N<sub>2</sub>OS [M + H]<sup>+</sup> 347.0461, found 347.0466.

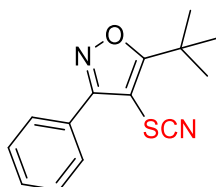

### 5-(tert-Butyl)-3-phenyl-4-thiocyanatoisoxazole (3u)

Purified by column chromatography (PE/*i*Pr<sub>2</sub>O = 10/1, v/v), TLC *R<sub>f</sub>* = 0.5, colourless oil (22.5 mg, 87%). <sup>1</sup>H NMR (500 MHz, CDCl<sub>3</sub>) δ 7.76-7.74 (m, 2H), 7.54-7.53 (m, 3H), 1.60 (s, 9H) ppm; <sup>13</sup>C NMR (126 MHz, CDCl<sub>3</sub>) δ 184.8, 164.2, 130.6, 129.0, 128.8, 127.0, 110.2, 92.8, 35.2, 28.4 ppm; IR (KBr) 2974, 2351, 2320, 2158 (SCN), 1589, 1541, 1384, 1276, 696 cm<sup>-1</sup>; HRMS (ESI) *m/z*: calcd. for C<sub>14</sub>H<sub>15</sub>N<sub>2</sub>OS [M + H]<sup>+</sup> 259.0900, found 259.0907.

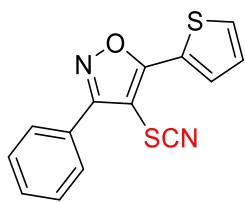

### 3-Phenyl-4-thiocyanato-5-(thiophen-2-yl)isoxazole (3v)

Purified by column chromatography (PE/*i*Pr<sub>2</sub>O = 5/1, v/v), TLC *R<sub>f</sub>* = 0.5, white solid (19.6 mg, 69%), mp: 80-82 °C. <sup>1</sup>H NMR (500 MHz, CDCl<sub>3</sub>) δ 8.00 (d, *J* = 3.5 Hz, 1H), 7.85-7.83 (m, 2H), 7.72 (d, *J* = 5.0 Hz, 1H), 7.57-7.54 (m, 3H), 7.28-7.26 (m, 1H) ppm; <sup>13</sup>C NMR (126 MHz, CDCl<sub>3</sub>) δ 169.2, 163.7, 131.8, 130.9, 130.8, 129.1, 128.6, 128.3, 126.5, 126.4, 108.9, 91.3 ppm; IR (KBr) 3082, 2362, 2160 (SCN), 1575, 1413, 1386, 1109, 769, 729, 696, 524 cm<sup>-1</sup>; HRMS (ESI) *m/z*: calcd. for C<sub>14</sub>H<sub>9</sub>N<sub>2</sub>OS<sub>2</sub> [*M* + *H*]<sup>+</sup> 285.0151, found 285.0162.

## 5. Gram Scale Reaction and Derivatization of Products

### Gram Scale Reaction

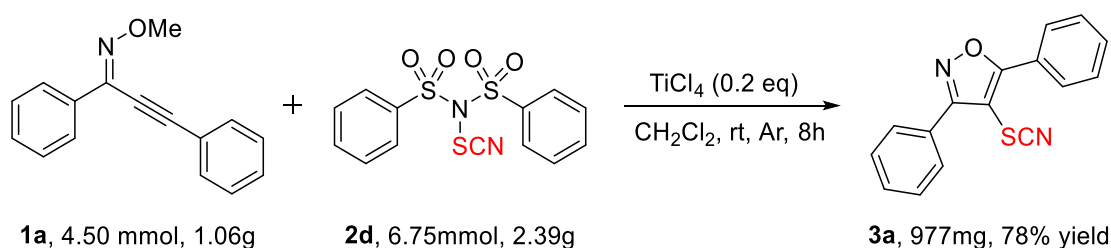

Under an argon atmosphere, a solution of **1a** (1.06 g, 4.50 mmol) in anhydrous DCM (45 mL) was charged into an oven-dried 100 mL round-bottom flask. TiCl<sub>4</sub> (89.91 μL, 0.90 mmol, 0.2 equiv) was added dropwise at ambient temperature, followed by the addition of reagent **2d** (2.39 g, 6.75 mmol, 1.5 equiv). The resulting mixture was stirred at room temperature for 8 h (reaction progress monitored by TLC). When the reaction was completed, the solvent was removed under reduced pressure. Purification of the crude material by flash column chromatography on silica gel (eluent: PE/*i*Pr<sub>2</sub>O) afforded product **3a** (977 mg, 78% yield).

### Derivatization of Products

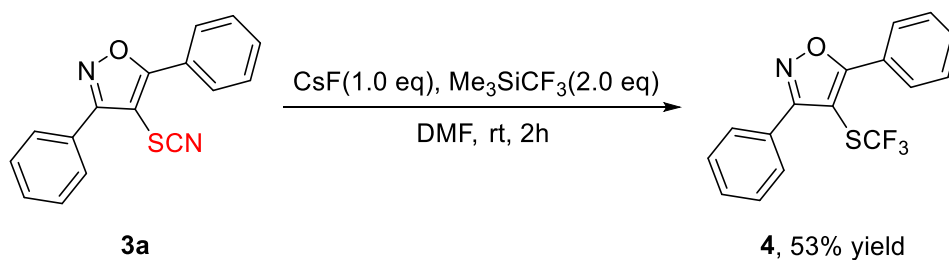

Under an argon atmosphere, substrate **3a** (55.6 mg, 0.2 mmol, 1.0 equiv) was dissolved in anhydrous DMF (2.0 mL) in a 25 mL reaction tube. To this solution, CsF (30.4 mg, 0.2 mmol, 1.0 equiv) and Me<sub>3</sub>SiCF<sub>3</sub> (56.8 mg, 0.4 mmol, 2.0 equiv) were added successively. The reaction mixture was stirred at room temperature for 2 h (reaction progress monitored by TLC). When the reaction was completed, the mixture was extracted with dichloromethane. The combined organic extracts were washed with brine, dried over anhydrous Na<sub>2</sub>SO<sub>4</sub>, and concentrated under reduced pressure. Purification by silica gel column chromatography (eluent: PE) afforded product **4** (34 mg, 53% yield).

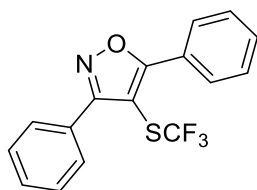

### 3,5-diphenyl-4-((trifluoromethyl)thio)isoxazole (**4**)

Purified by column chromatography (PE), TLC R<sub>f</sub> = 0.3, white solid (34 mg, 53%), mp: 112-114 °C. <sup>1</sup>H NMR (500 MHz, CDCl<sub>3</sub>) δ 8.17-8.15 (m, 2H), 7.86-7.84 (m, 2H), 7.56-7.52 (m, 6H) ppm; <sup>13</sup>C NMR (126 MHz, CDCl<sub>3</sub>) δ 174.3, 165.2, 131.7, 130.3, 129.0, 128.8, 128.7, 128.6 (q, *J* = 312.5 Hz), 127.9, 127.6, 126.3, 95.2 ppm; <sup>19</sup>F NMR (471 MHz, CDCl<sub>3</sub>) δ -43.0 ppm; IR (KBr) 2922, 2814, 2355, 2322, 1583, 1446, 1382, 1350, 1112, 765, 731 cm<sup>-1</sup>; HRMS (ESI) *m/z*: calcd. for C<sub>16</sub>H<sub>11</sub>F<sub>3</sub>NOS [M + H]<sup>+</sup> 322.0508, found 322.0520.

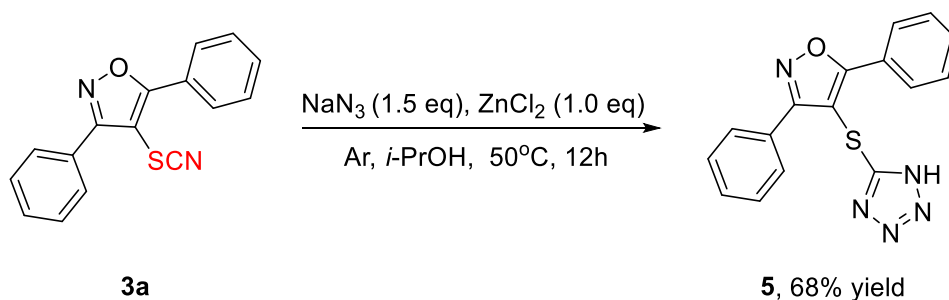

Under an argon atmosphere, compound **3a** (55.6 mg, 0.2 mmol) was dissolved in anhydrous *i*-PrOH (6.0 mL) in an oven-dried 25 mL round-bottom flask. ZnCl<sub>2</sub> (27.3 mg, 0.2 mmol) and NaN<sub>3</sub> (19.5 mg, 0.3 mmol) were added sequentially at room temperature. The reaction mixture was gradually heated to 50°C and stirred for 12 h (progress monitored by TLC). When the reaction was completed, the reaction was quenched with H<sub>2</sub>O (6.0 mL) and extracted with EA (3 × 6 mL). The combined organic layers were dried over anhydrous Na<sub>2</sub>SO<sub>4</sub>, filtered, and concentrated in vacuo. Purification by flash column chromatography on silica gel (gradient elution: CH<sub>2</sub>Cl<sub>2</sub>/MeOH = 3/1, v/v) afforded the desired product **5** (44 mg, 68% yield).

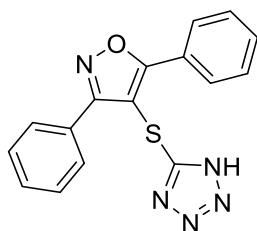

#### 4-((1*H*-Tetrazol-5-yl)thio)-3,5-diphenylisoxazole (**5**)

Purified by column chromatography (CH<sub>2</sub>Cl<sub>2</sub>/MeOH = 3/1, v/v), TLC R<sub>f</sub> = 0.4, white solid (44 mg, 68%). <sup>1</sup>H NMR (500 MHz, C<sub>2</sub>D<sub>6</sub>SO) δ 8.07-8.05 (m, 2H), 7.82-7.80 (m, 2H), 7.60-7.54 (m, 3H), 7.51-7.47 (m, 3H) ppm; <sup>13</sup>C NMR (126 MHz, C<sub>2</sub>D<sub>6</sub>SO) δ 172.3, 164.9, 155.7, 131.9, 130.7, 129.5, 129.2, 128.9, 128.1, 128.0, 126.7, 101.2 ppm; IR (KBr) 2814, 2351, 2310, 1651, 1575, 1456, 1338 cm<sup>-1</sup>; HRMS (ESI) m/z: calcd. for C<sub>16</sub>H<sub>12</sub>N<sub>5</sub>OS [M + H]<sup>+</sup> 322.0758, found 322.0769.

## 6. Single Crystal X-Ray Data for Compound 3j (CCDC 2486964)

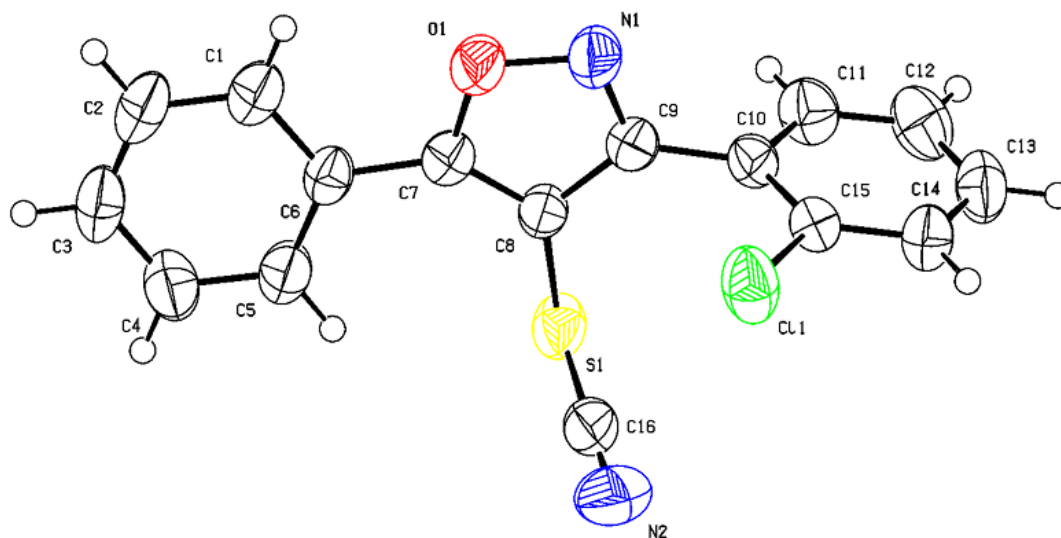

**Table S1 Single Crystal Data of 3j**

| Compound                           | 3j                                                 |
|------------------------------------|----------------------------------------------------|
| Empirical formula                  | C <sub>16</sub> H <sub>9</sub> ClN <sub>2</sub> OS |
| Formula weight                     | 312.76                                             |
| Temperature/K                      | 293.00                                             |
| Crystal system                     | monoclinic                                         |
| Space group                        | P2 <sub>1</sub> /c                                 |
| a/Å                                | 16.794(3)                                          |
| b/Å                                | 11.032(2)                                          |
| c/Å                                | 7.8875(17)                                         |
| α/°                                | 90                                                 |
| β/°                                | 101.768(7)                                         |
| γ/°                                | 90                                                 |
| Volume/Å <sup>3</sup>              | 1430.7(5)                                          |
| Z                                  | 4                                                  |
| ρ <sub>calc</sub> /cm <sup>3</sup> | 1.452                                              |
| μ/mm <sup>-1</sup>                 | 0.411                                              |
| F(000)                             | 640.0                                              |
| Crystal size/mm <sup>3</sup>       | 0.12 × 0.1 × 0.08                                  |
| Radiation                          | MoKα (λ = 0.71073)                                 |
| 2θ range for data collection/°     | 4.956 to 50.77                                     |
| Index ranges                       | -20 ≤ h ≤ 20, -12 ≤ k ≤ 13, -8 ≤ l ≤ 9             |
| Reflections collected              | 9917                                               |



|                                                |                                                                  |
|------------------------------------------------|------------------------------------------------------------------|
| Independent reflections                        | 2619 [ $R_{\text{int}} = 0.0401$ , $R_{\text{sigma}} = 0.0362$ ] |
| Data/restraints/parameters                     | 2619/0/190                                                       |
| Goodness-of-fit on $F^2$                       | 1.052                                                            |
| Final R indexes [ $I \geq 2\sigma(I)$ ]        | $R_1 = 0.0428$ , $wR_2 = 0.1330$                                 |
| Final R indexes [all data]                     | $R_1 = 0.0600$ , $wR_2 = 0.1494$                                 |
| Largest diff. peak/hole / $e \text{ \AA}^{-3}$ | 0.22/-0.31                                                       |
| CCDC                                           | 2486964                                                          |

---

## 7. References

1. F. Zhou, C. Li, M. Li, Y. Jin, H. Jiang, Y. Zhang and W. Wu, *Chem. Commun.*, 2021, **57**, 4799-4802.
2. Z. She, D. Niu, L. Chen, M. A. Gunawan, X. Shanja, W. H. Hersh and Y. Chen, *J. Org. Chem.*, 2012, **77**, 3627-3633.
3. Y. Jeong, B.-I Kim, J. K. Lee and J.-S. Ryu, *J. Org. Chem.*, 2014, **79**, 6444-6455.
4. R. Kotipalli, A. Nagireddy and M. S. Reddy, *Org. Biomol. Chem.*, 2022, **20**, 2609-2614.
5. J. Wang, X.-X. Lu, R.-P. Yang, B.-B. Zhang, Z.-H. Xiang, J.-C. Li, L. Liu, S. Chao and X. Shang, *Org. Lett.*, 2023, **25**, 8489-8494.
6. Z.-Z. Zhang, R. Chen, X.-H. Zhang and X.-G. Zhang, *J. Org. Chem.*, 2020, **86**, 632-642.
7. C. Li, J. Li, F. Zhou, C. Li and W. Wu, *J. Org. Chem.*, 2019, **84**, 11958-11970.
8. X. Liu, D. Hong, Z. She, W. H. Hersh, B. Yoo and Y. Chen, *Tetrahedron*, 2018, **74**, 6593-6606.
9. J. P. Waldo and R. C. Larock, *J. Org. Chem.*, 2007, **72**, 9643-9647.
10. C. Li, P. Long, H. Wu, H. Yin and F.-X. Chen, *Org. Biomol. Chem.*, 2019, **17**, 7131-7134

## 8. Copies of $^1\text{H}$ , $^{13}\text{C}$ and $^{19}\text{F}$ NMR Spectra

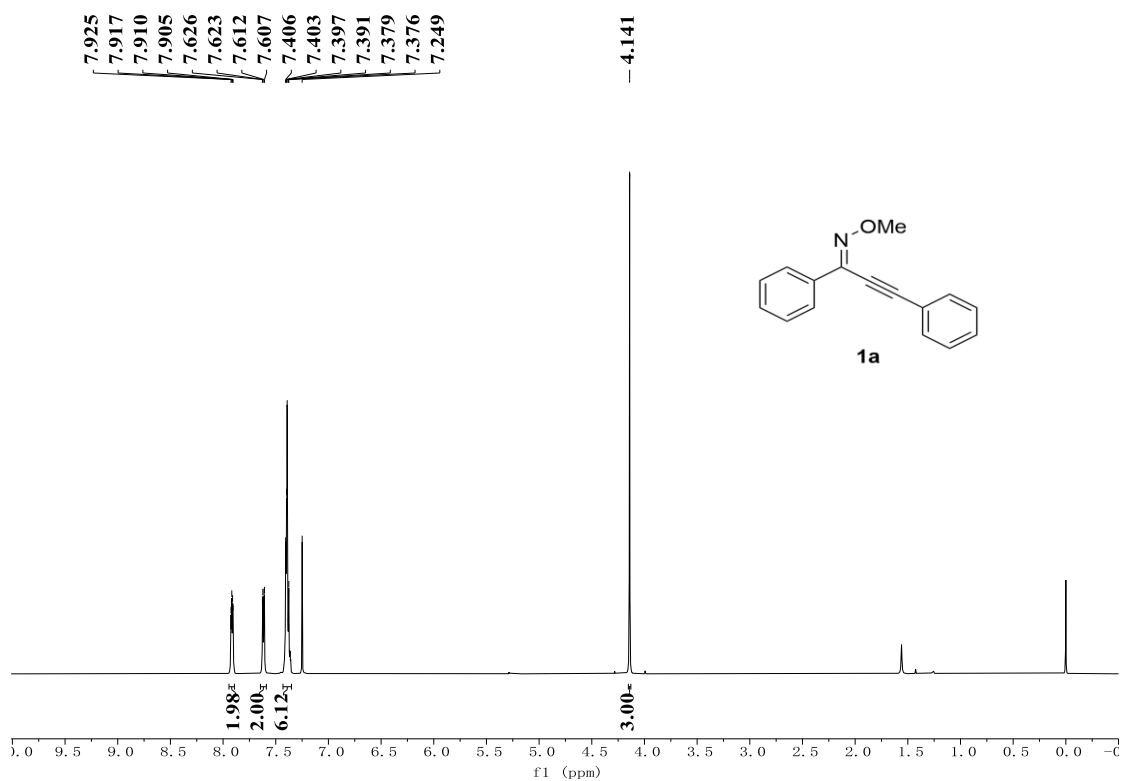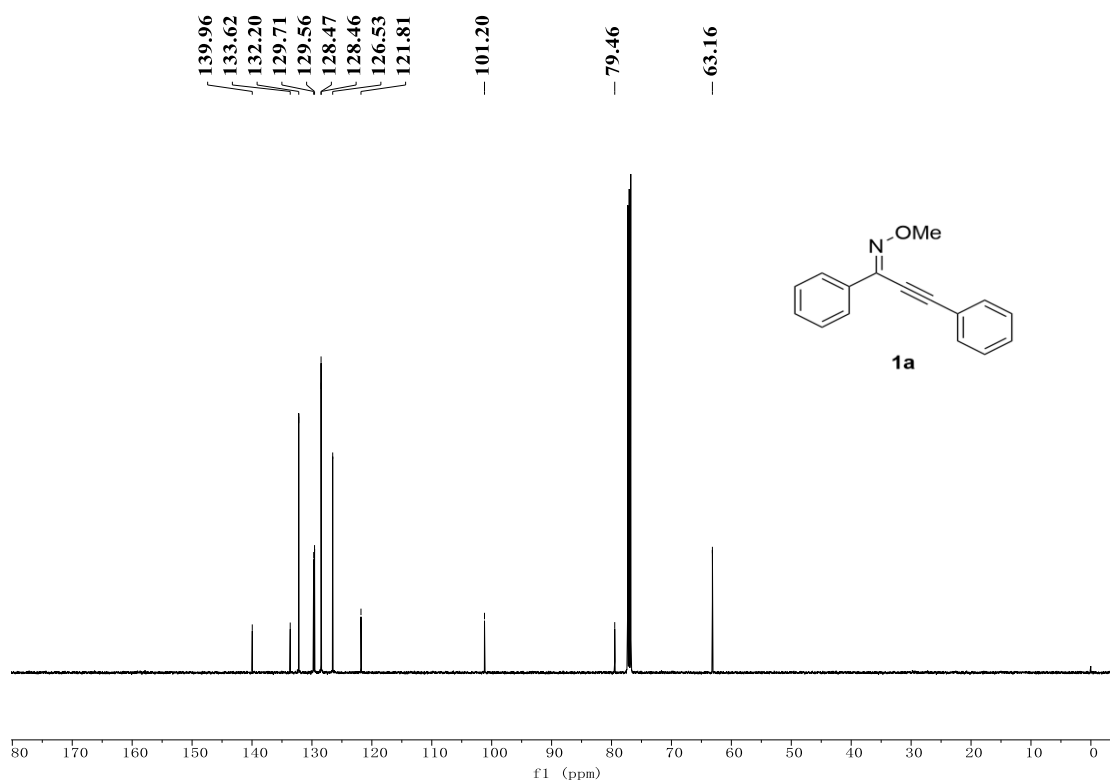

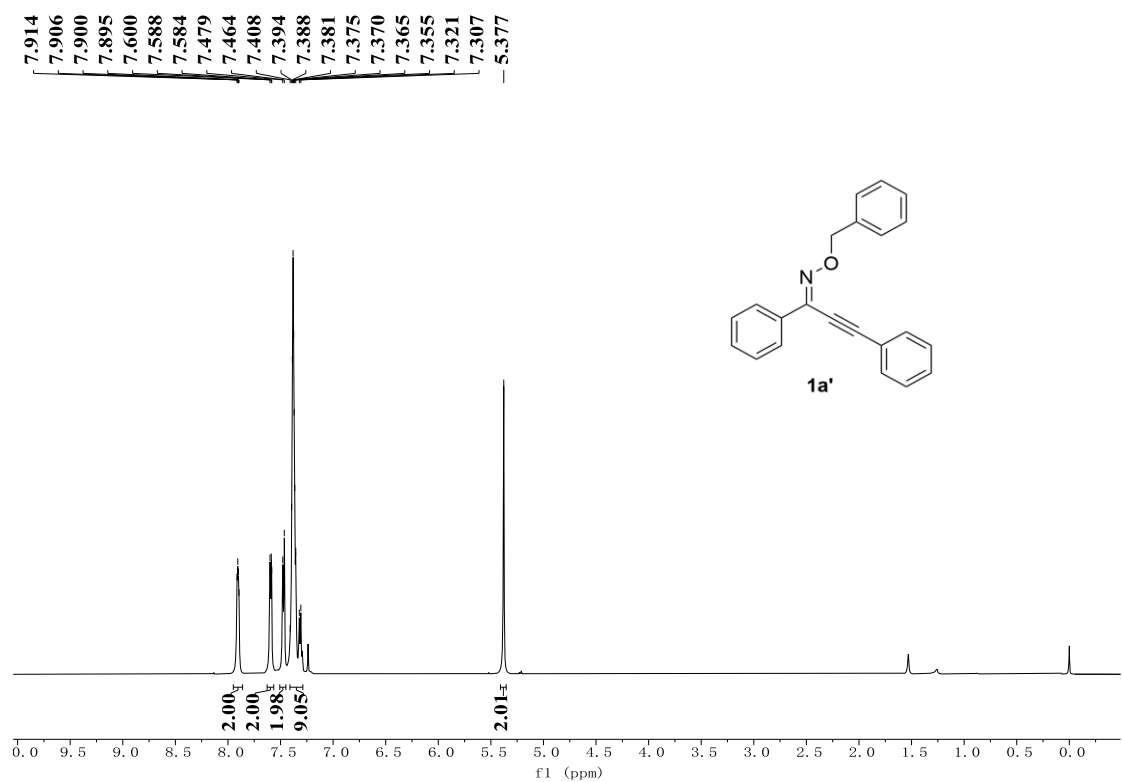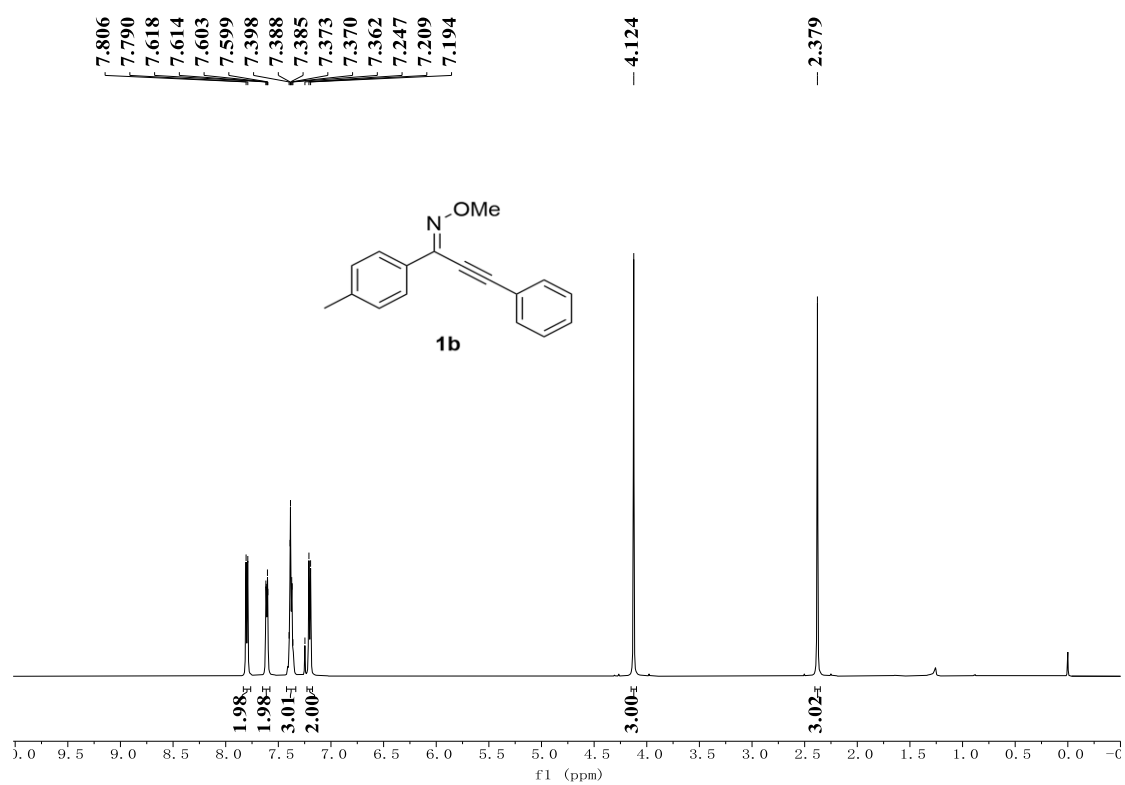

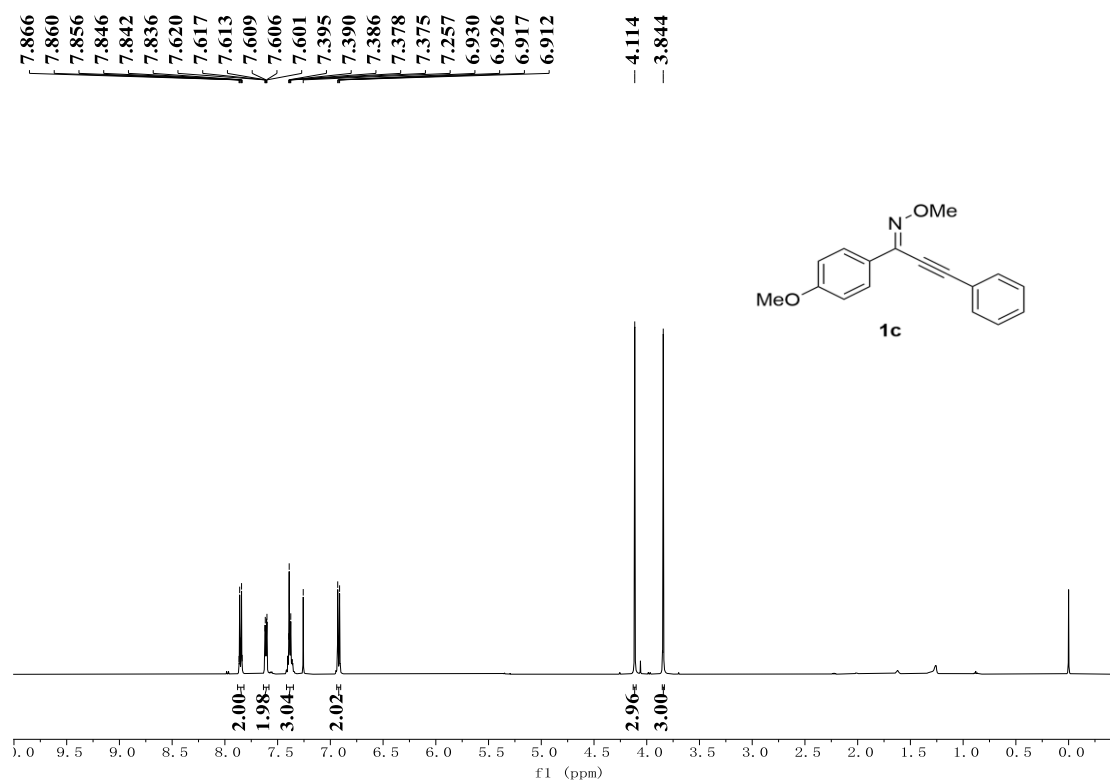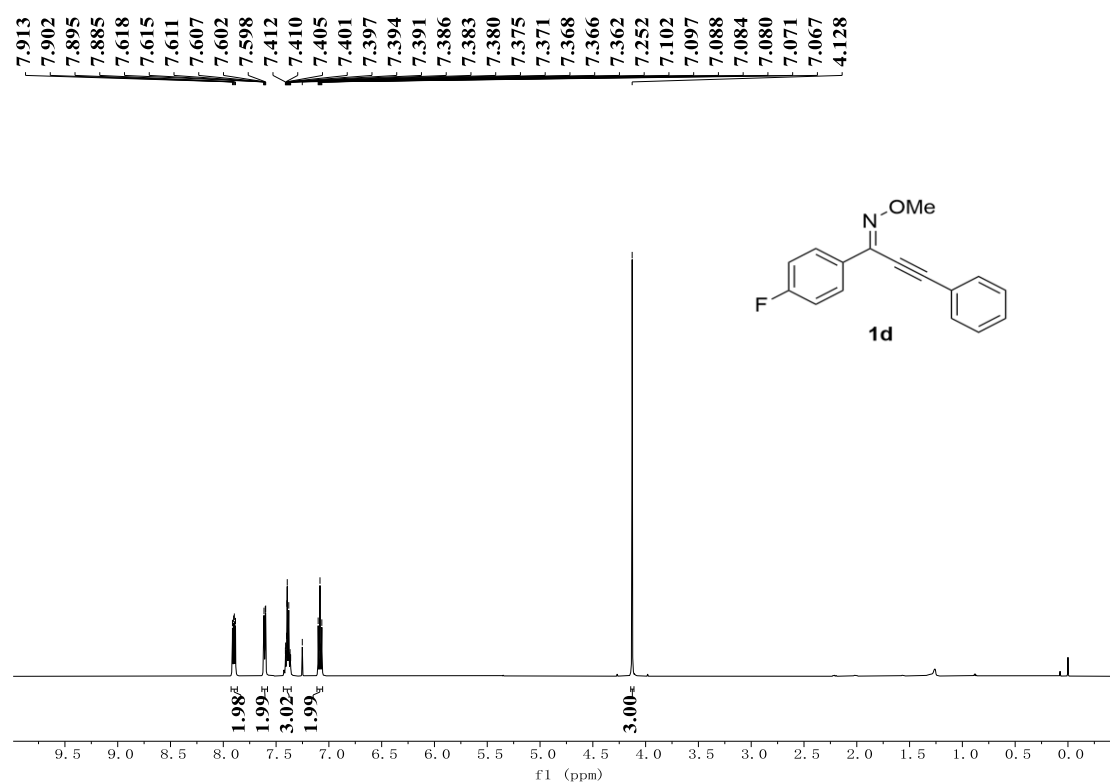

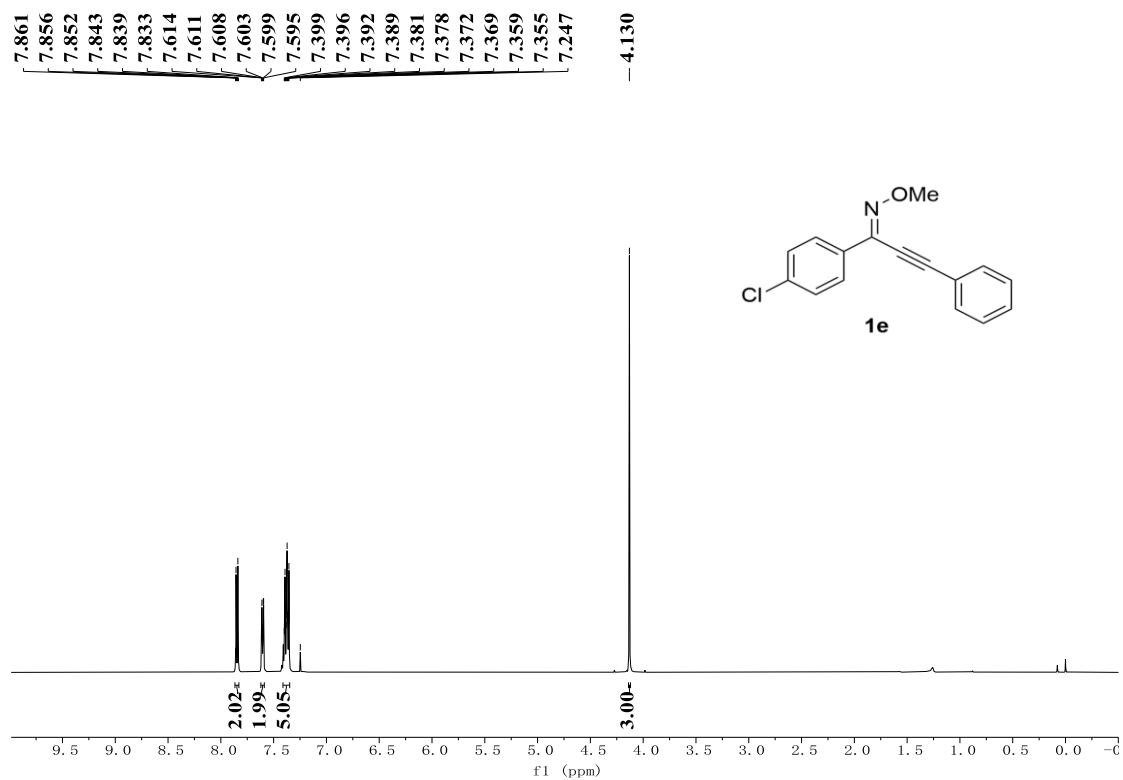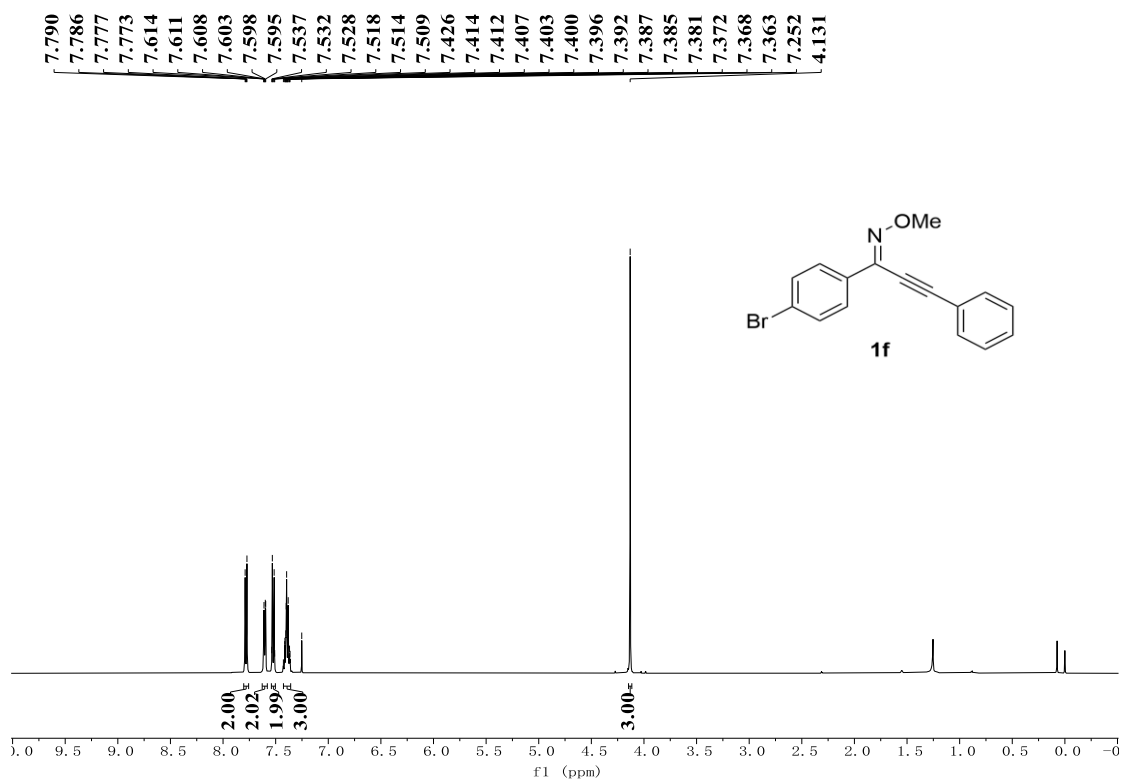

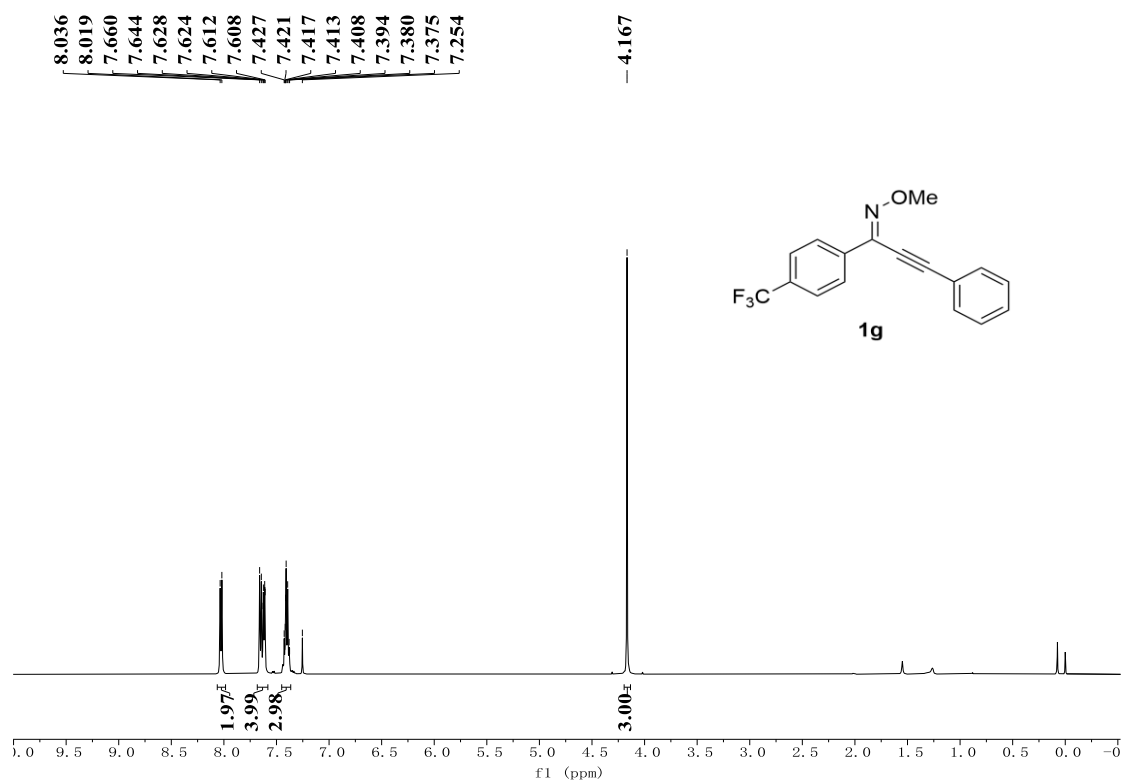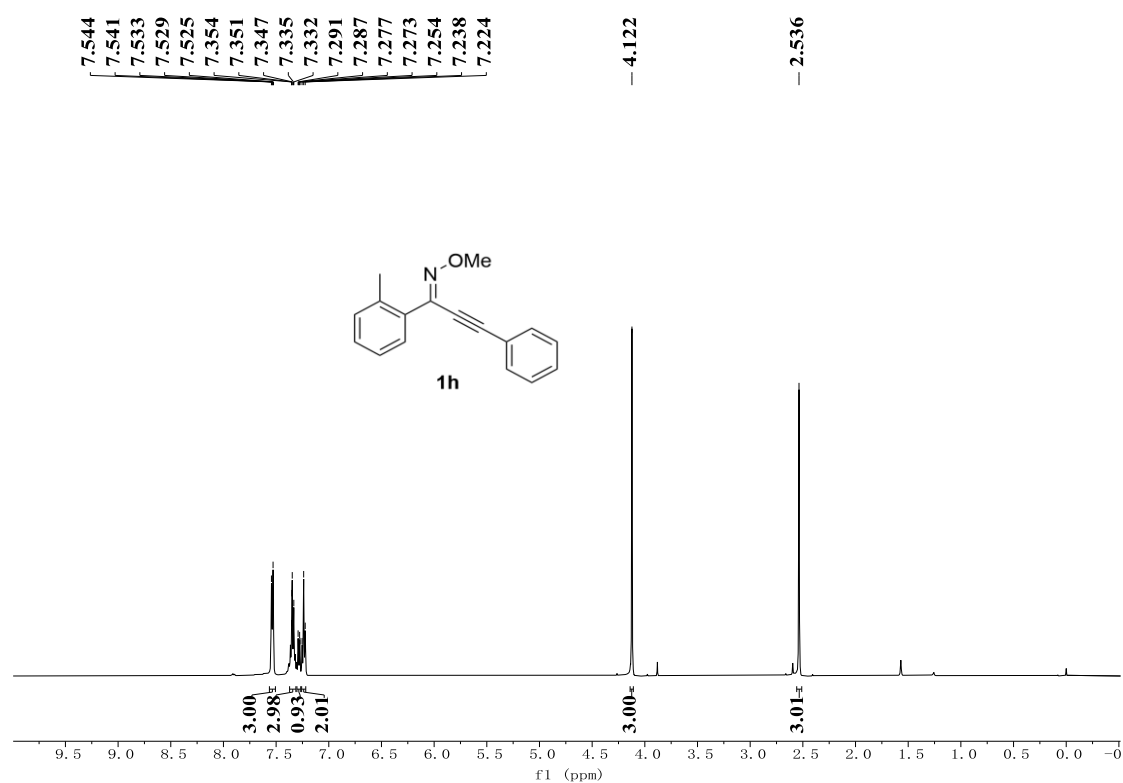

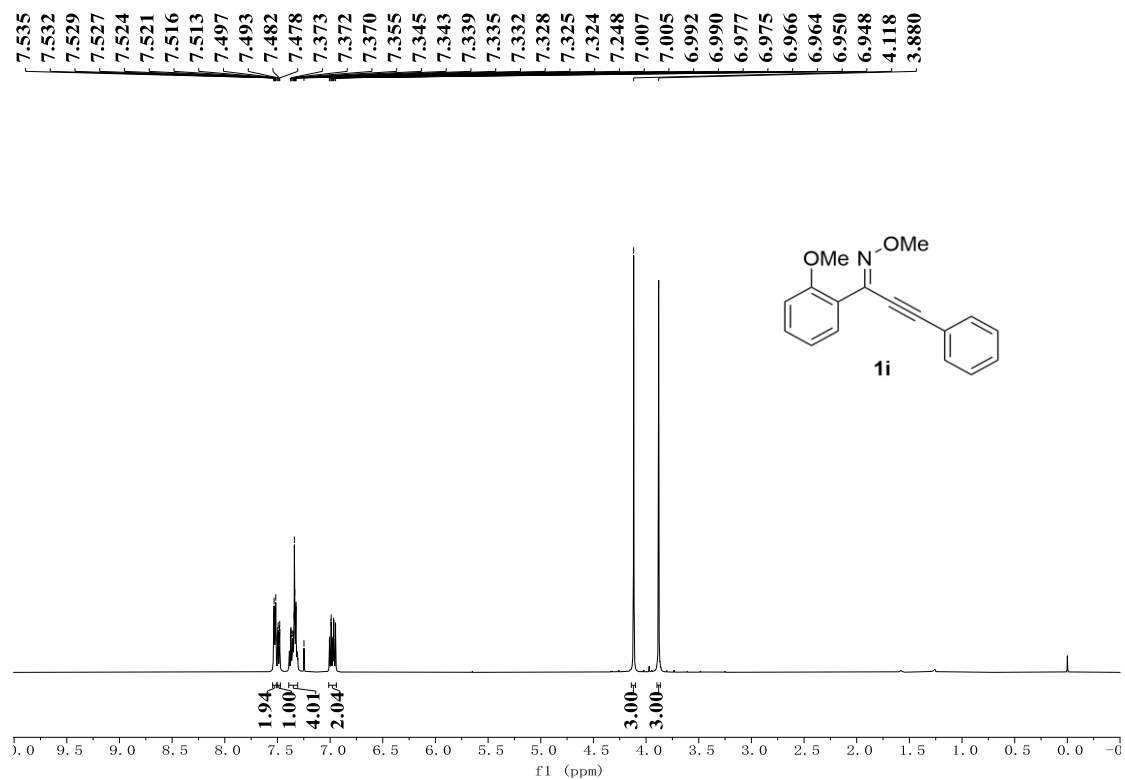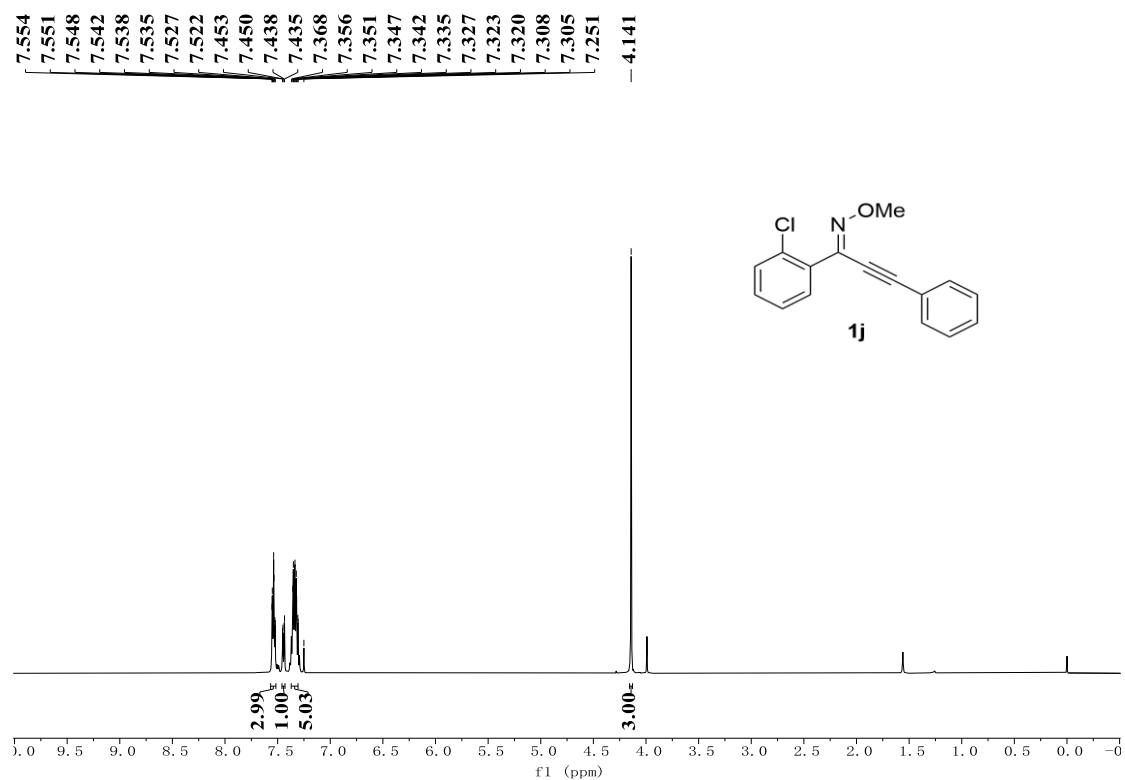

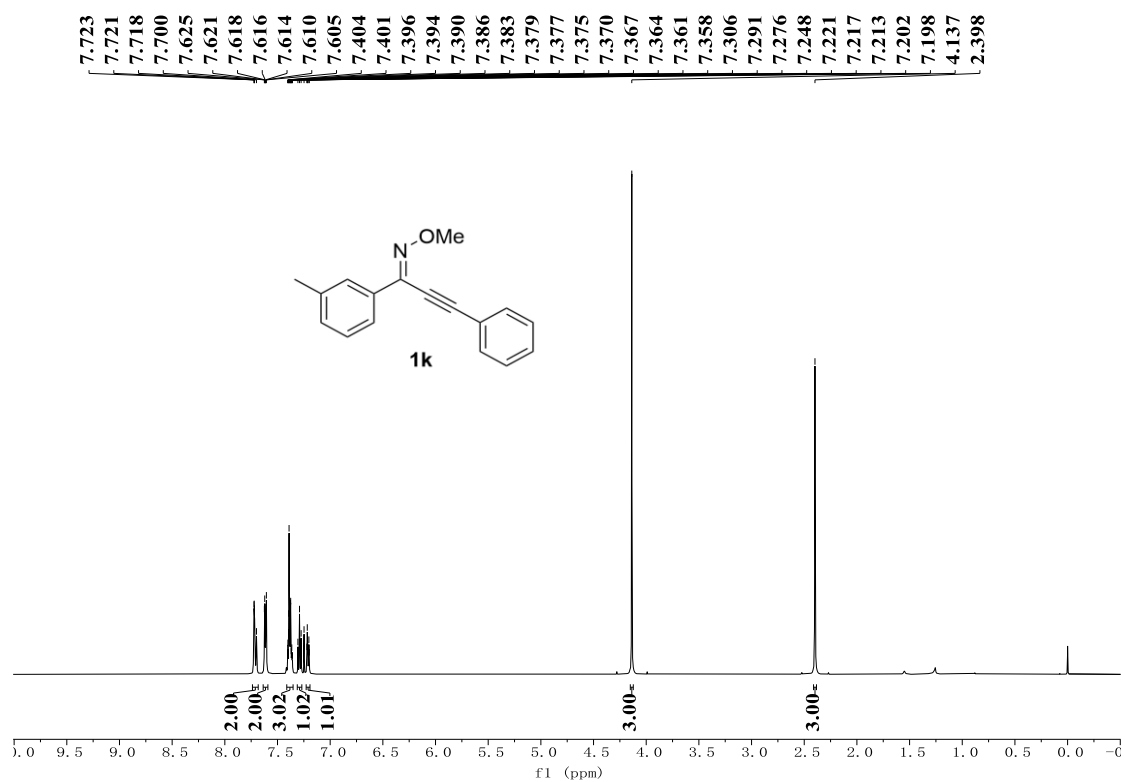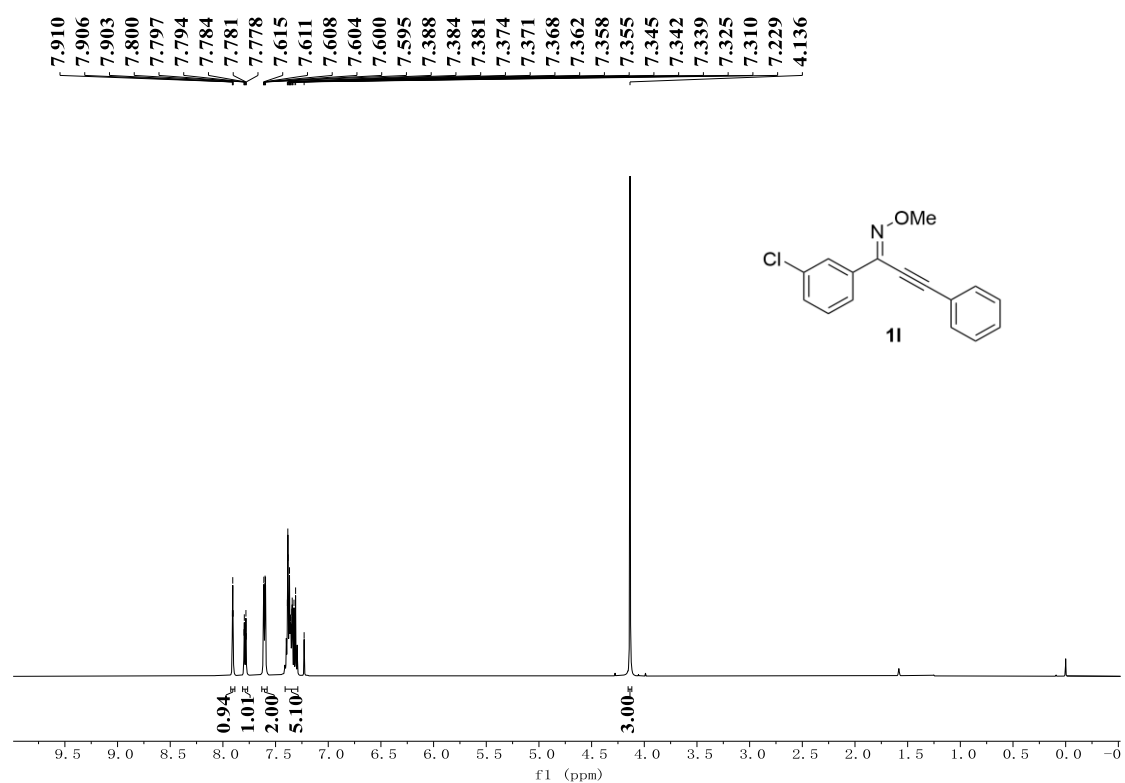



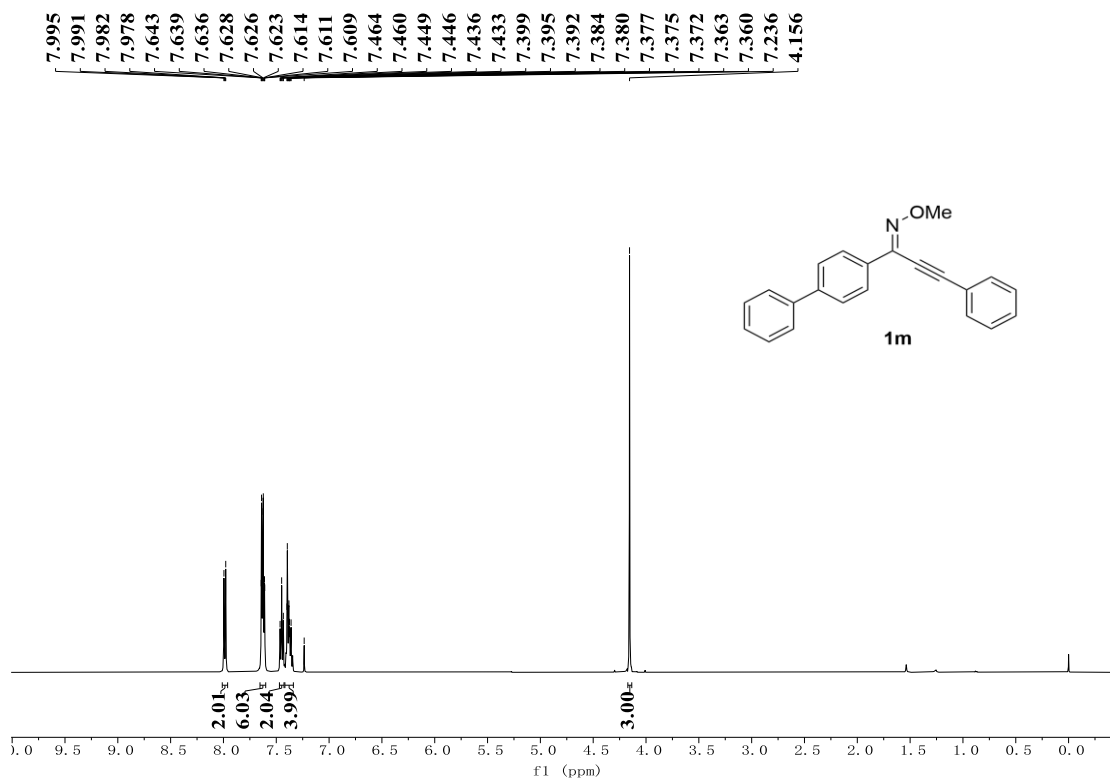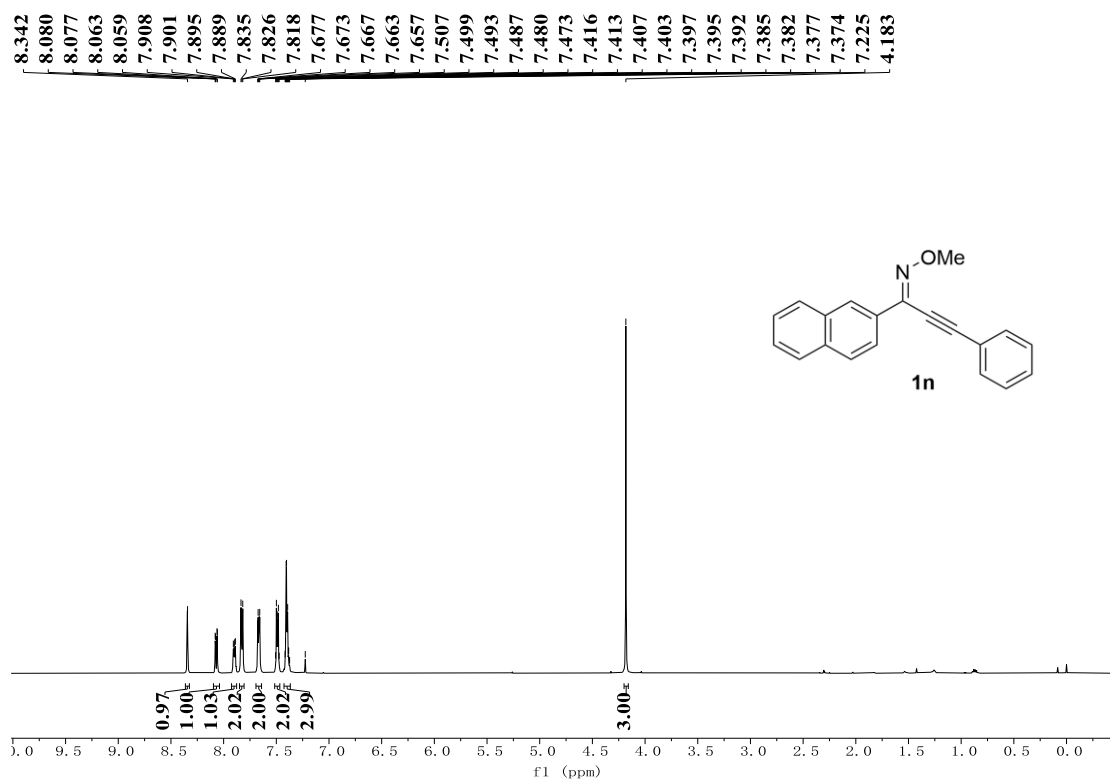

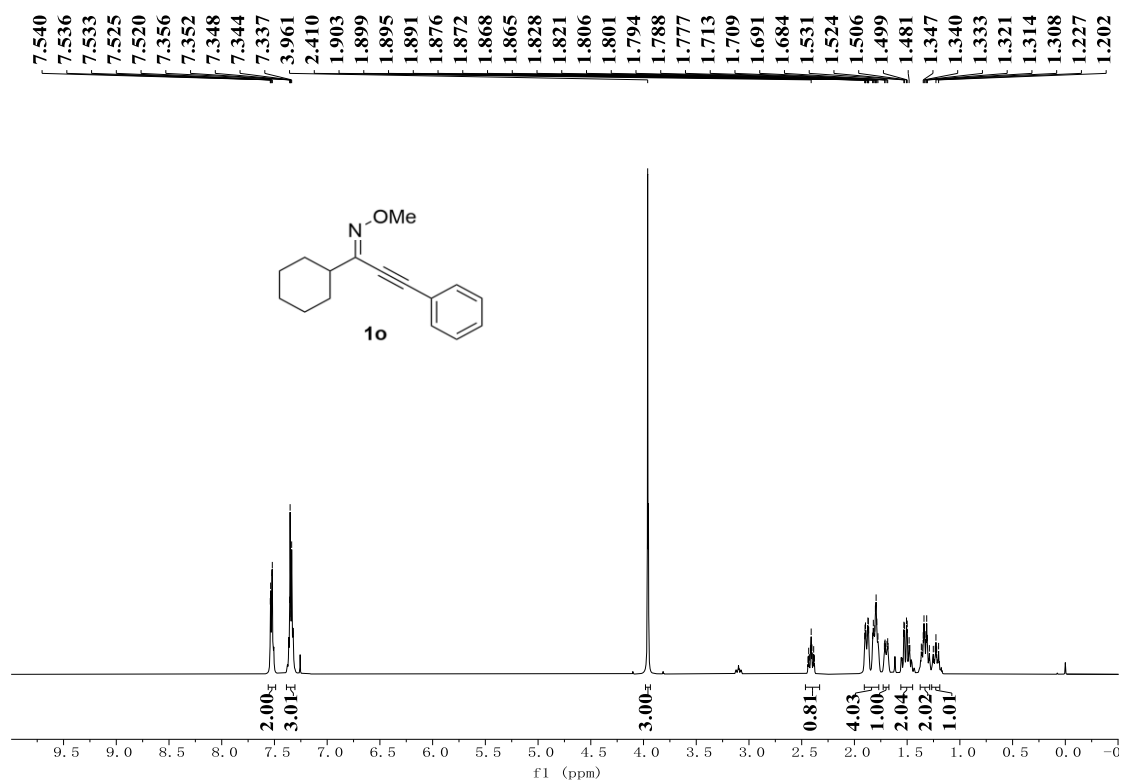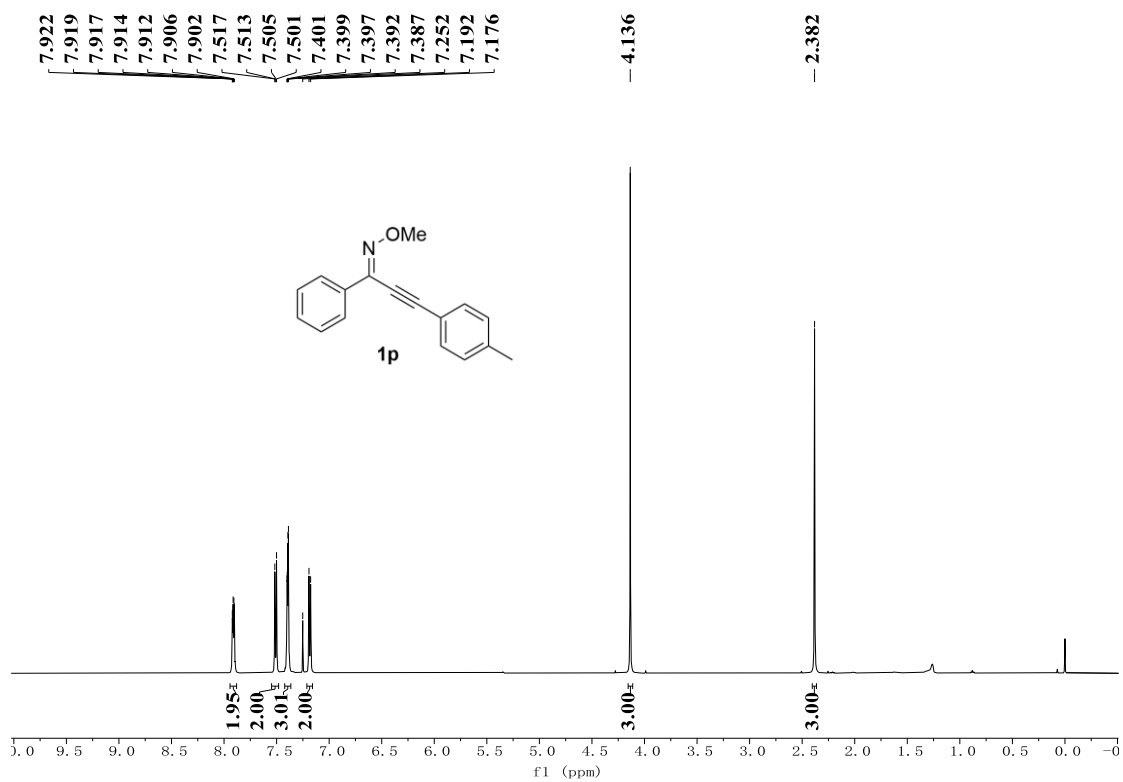

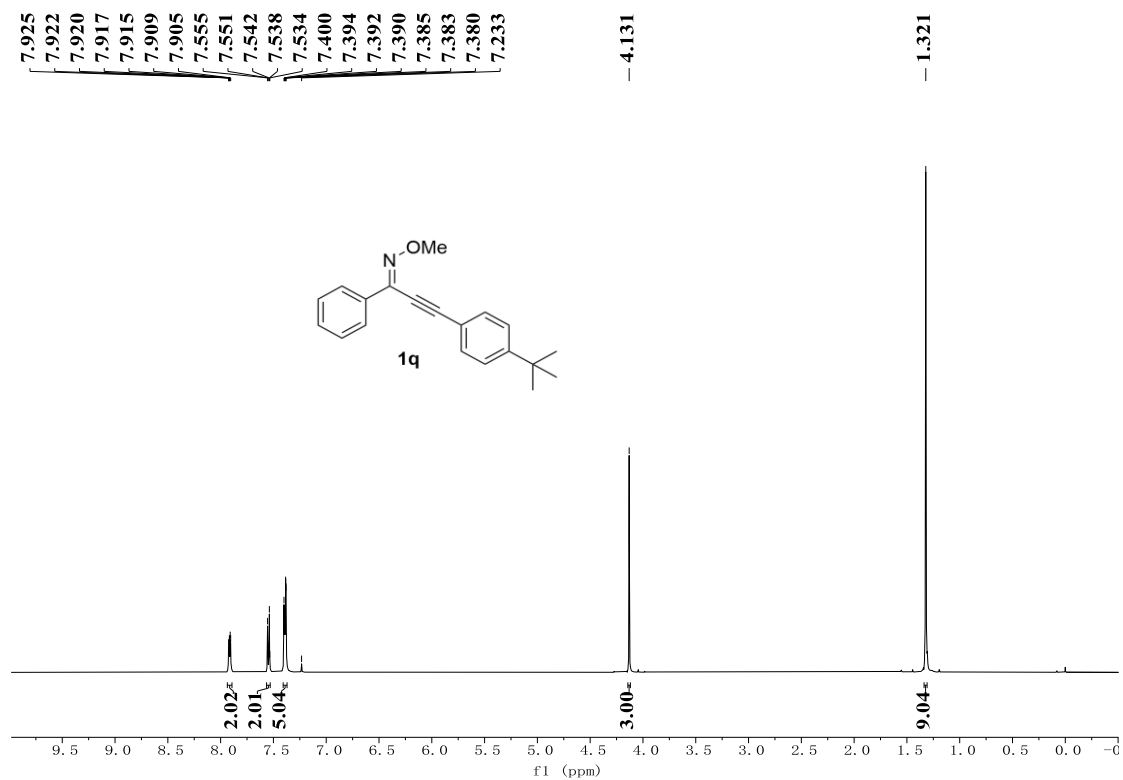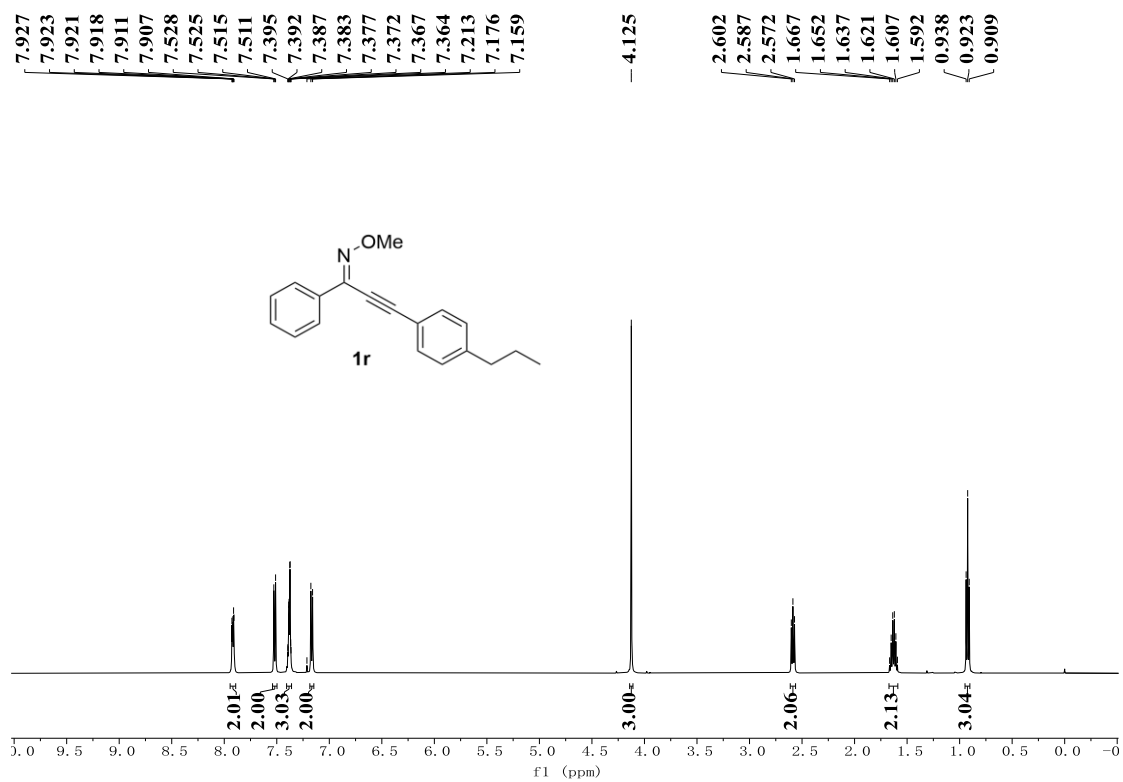

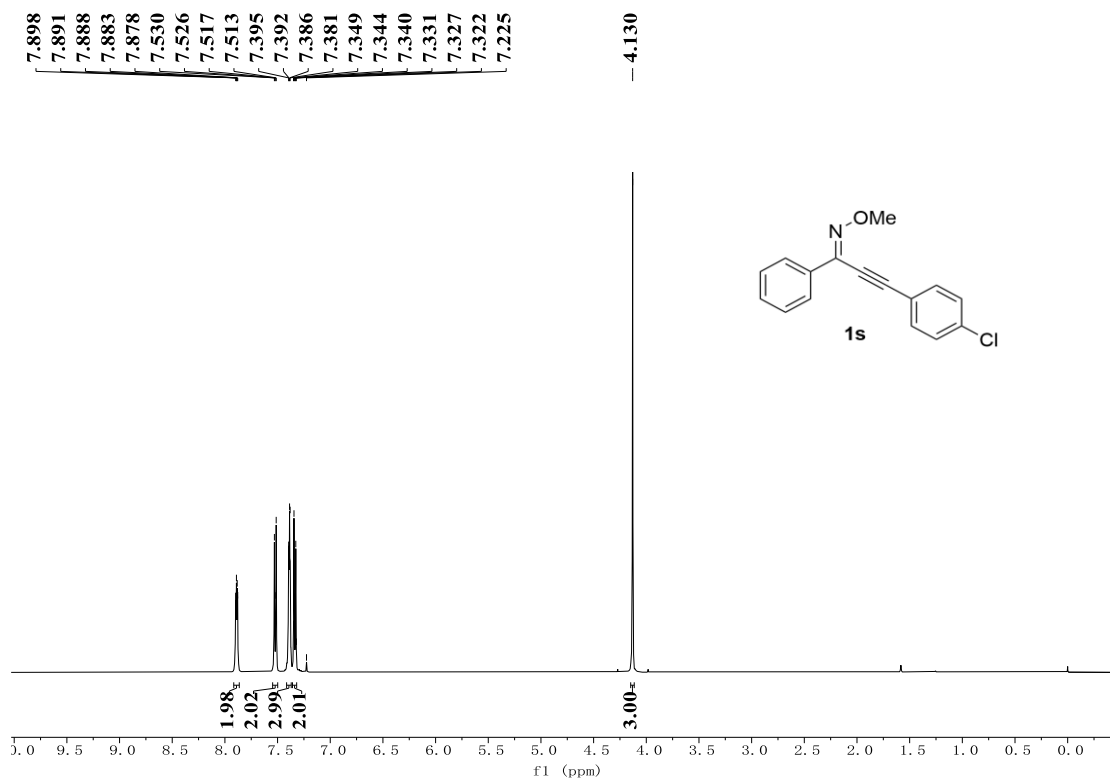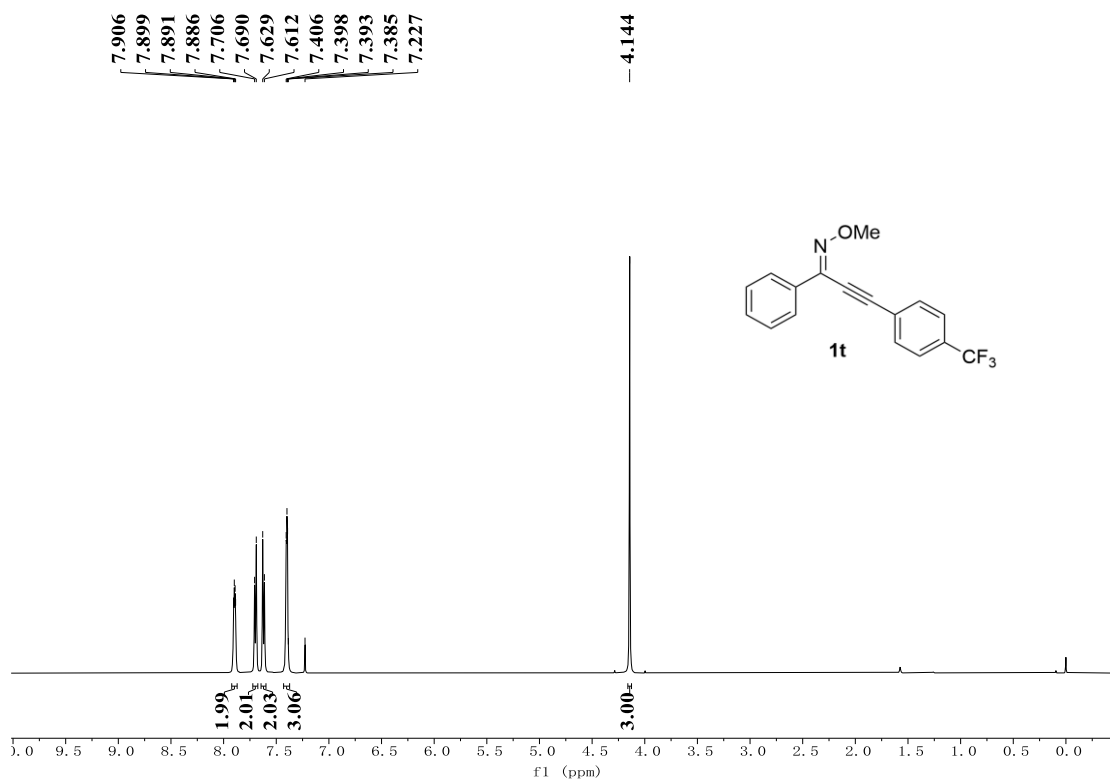

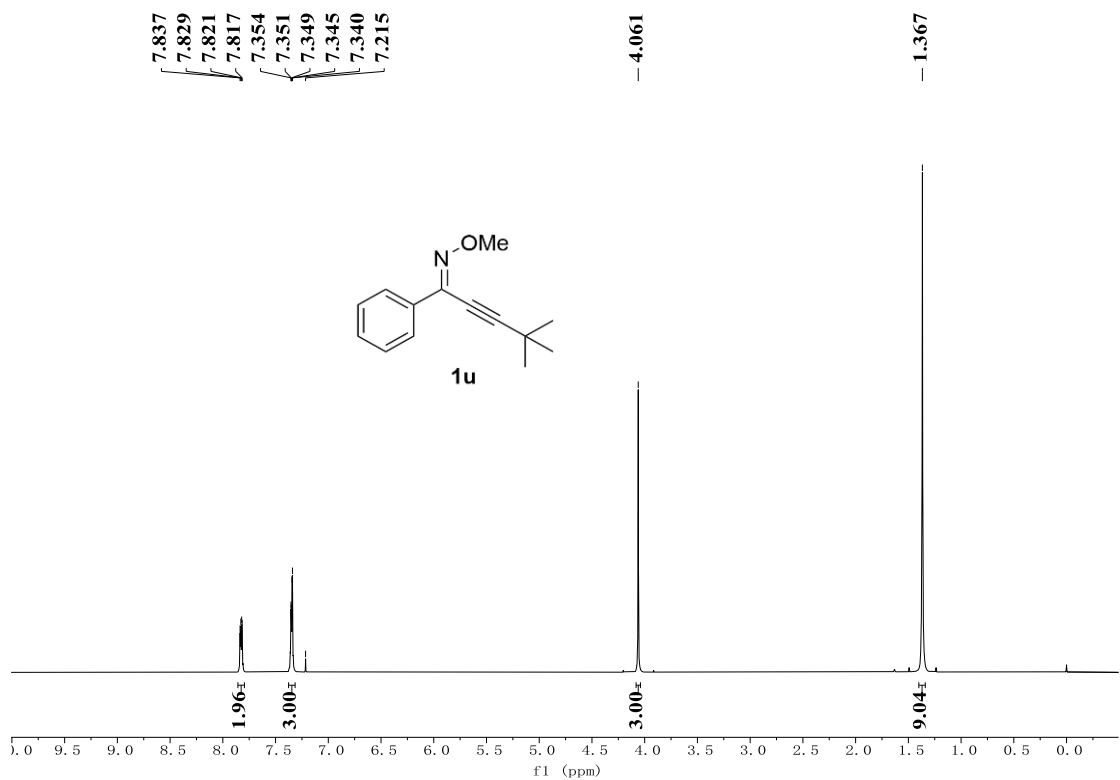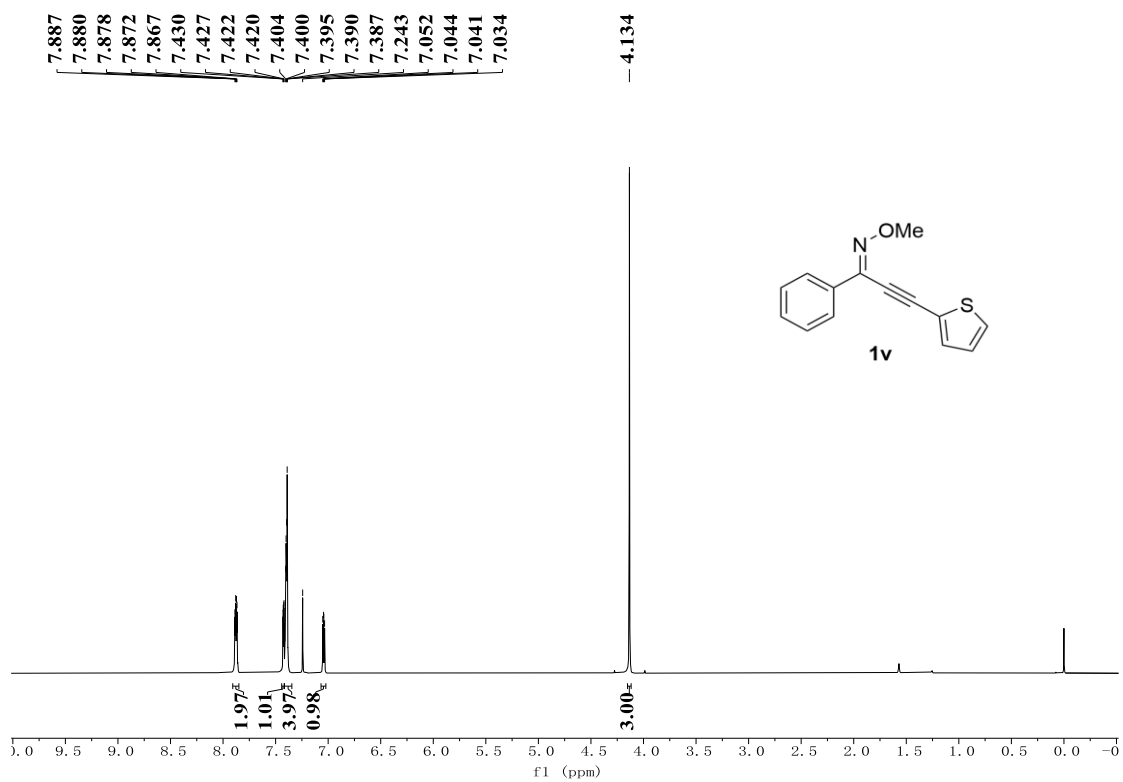

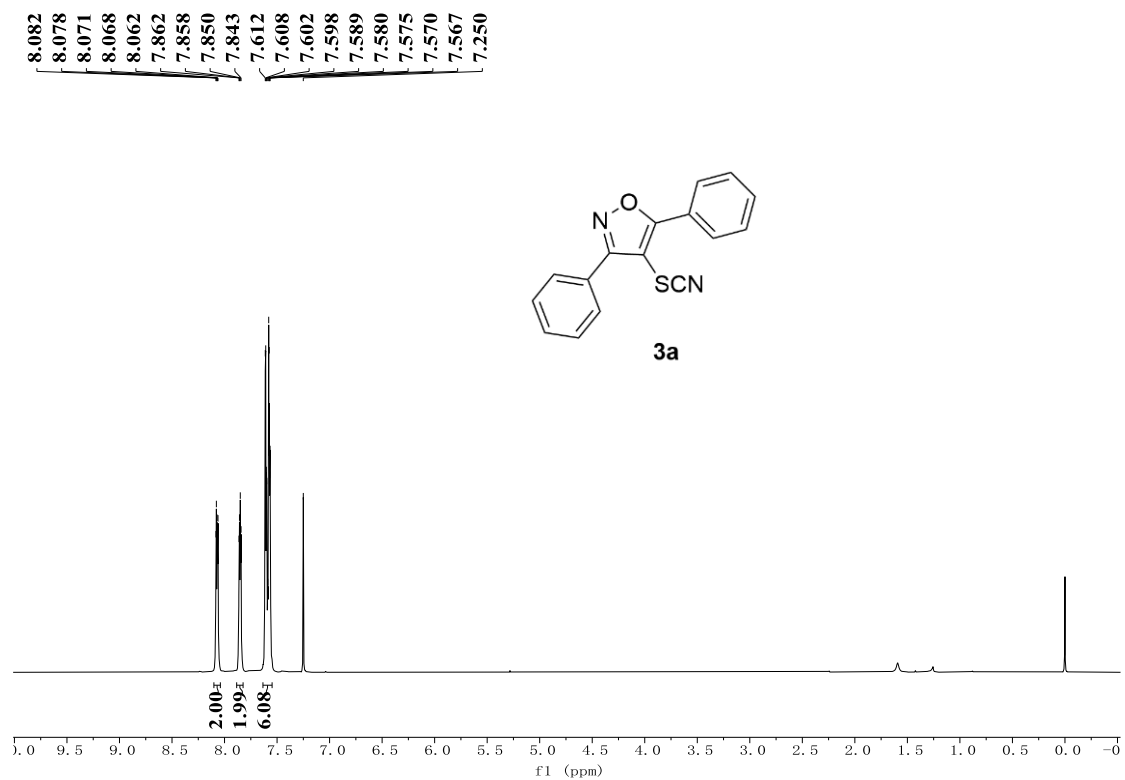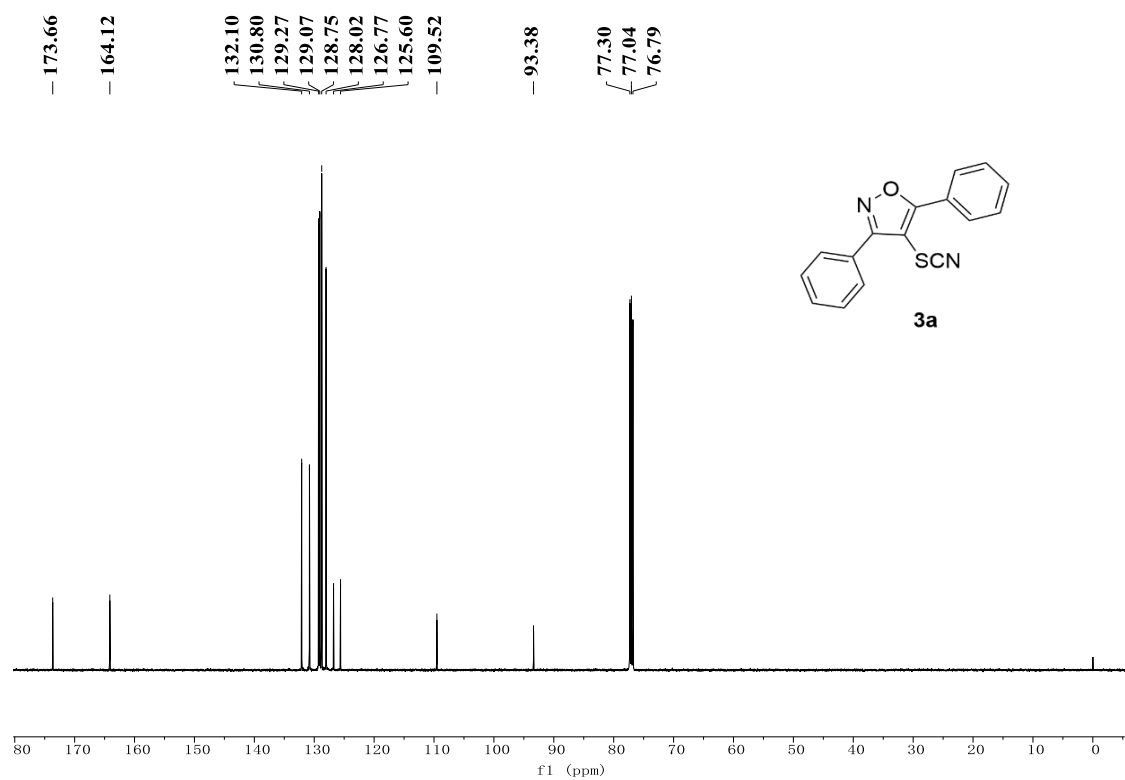

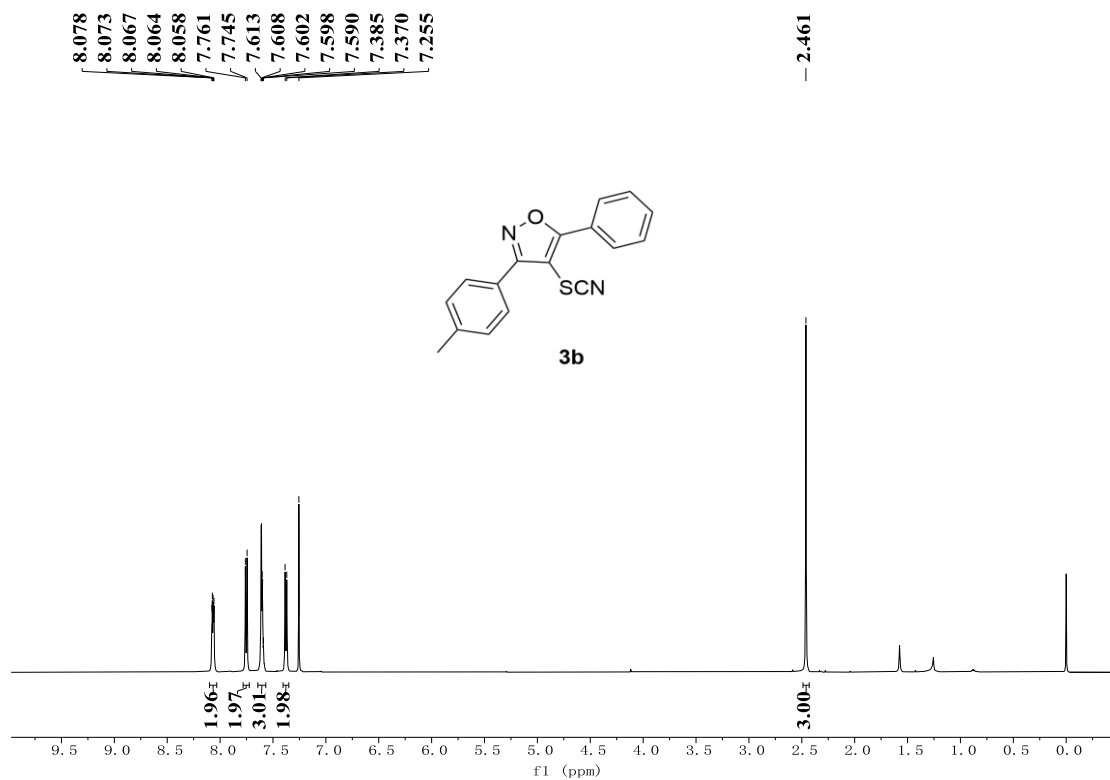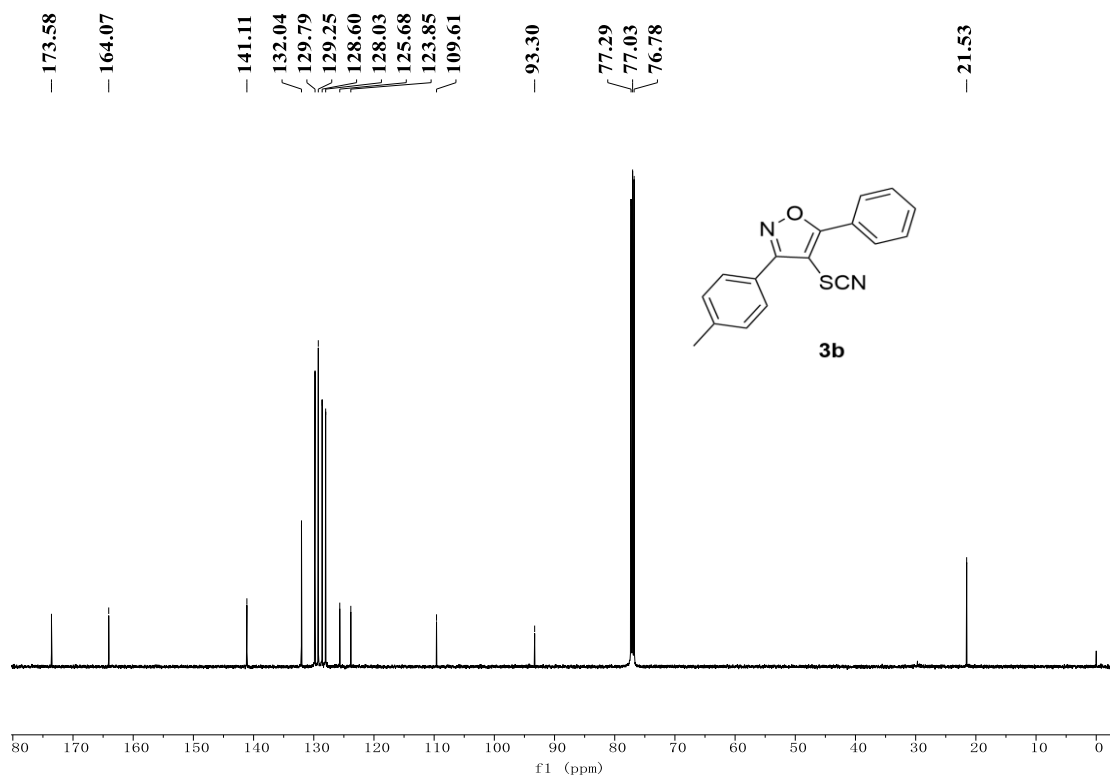

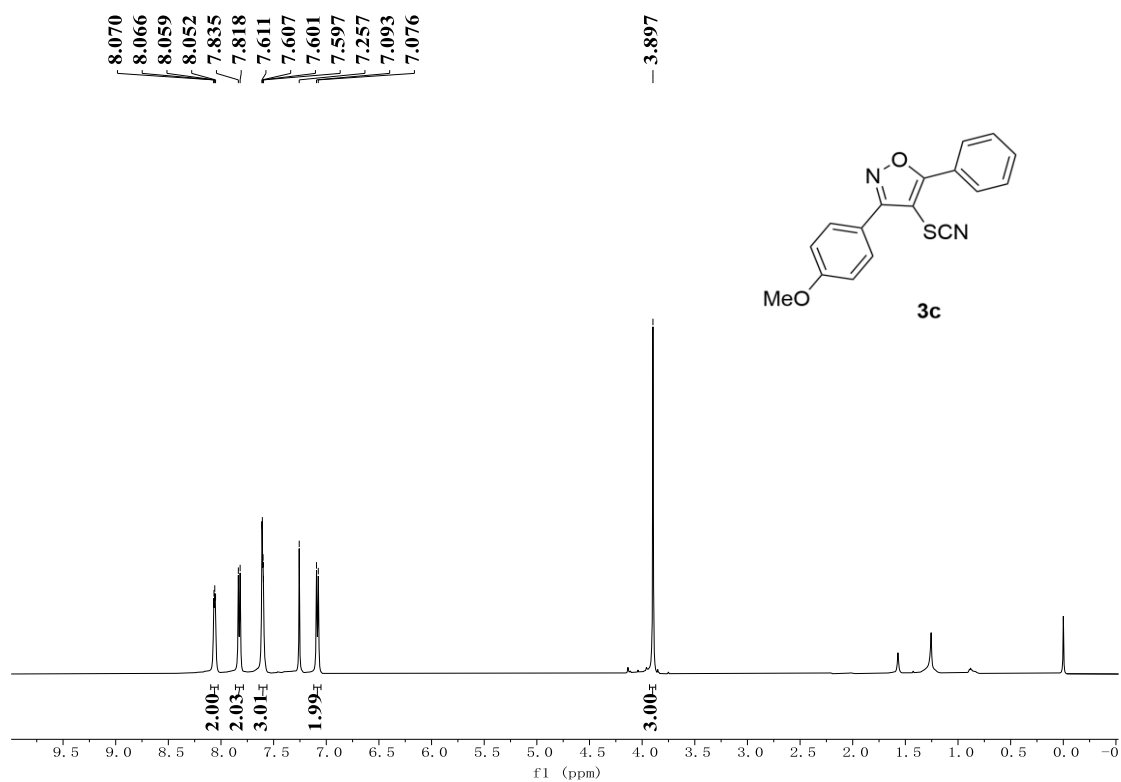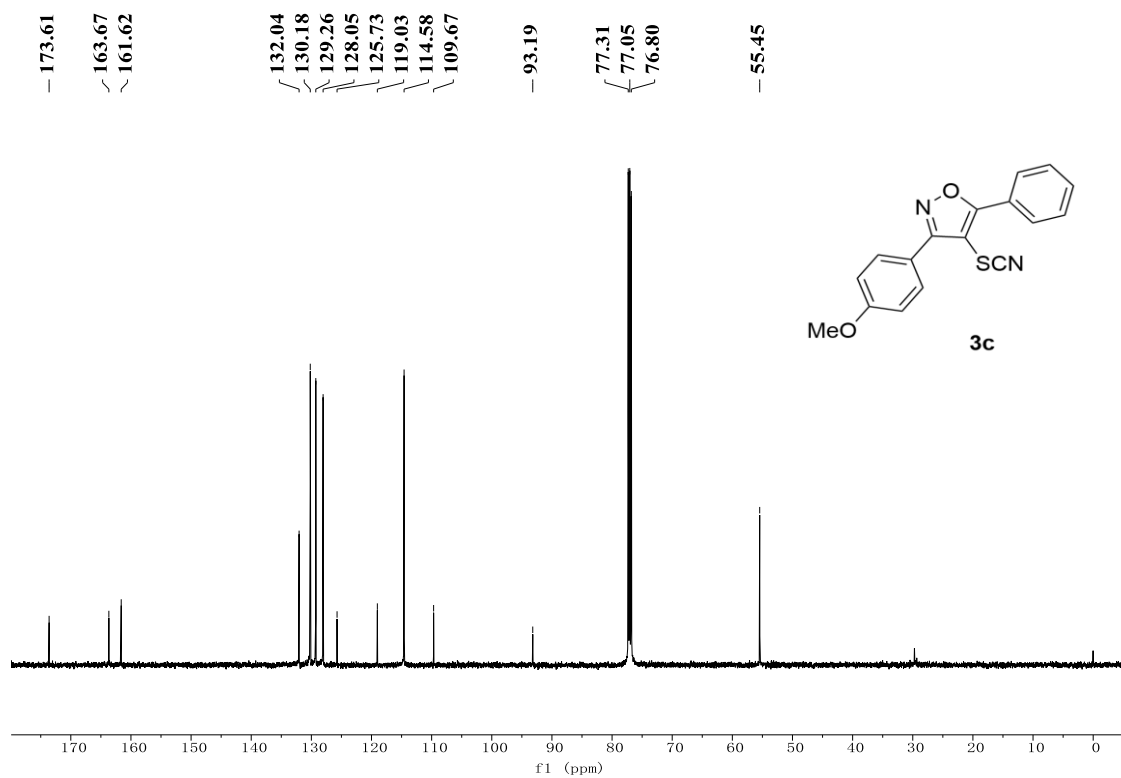



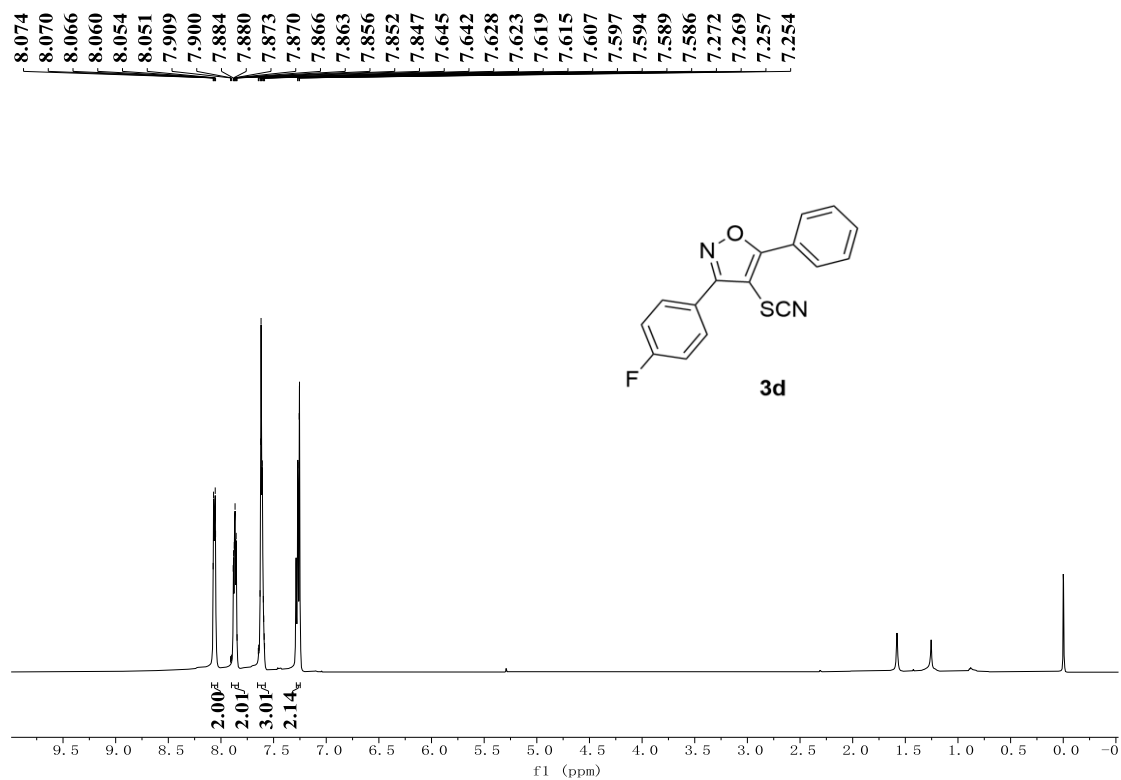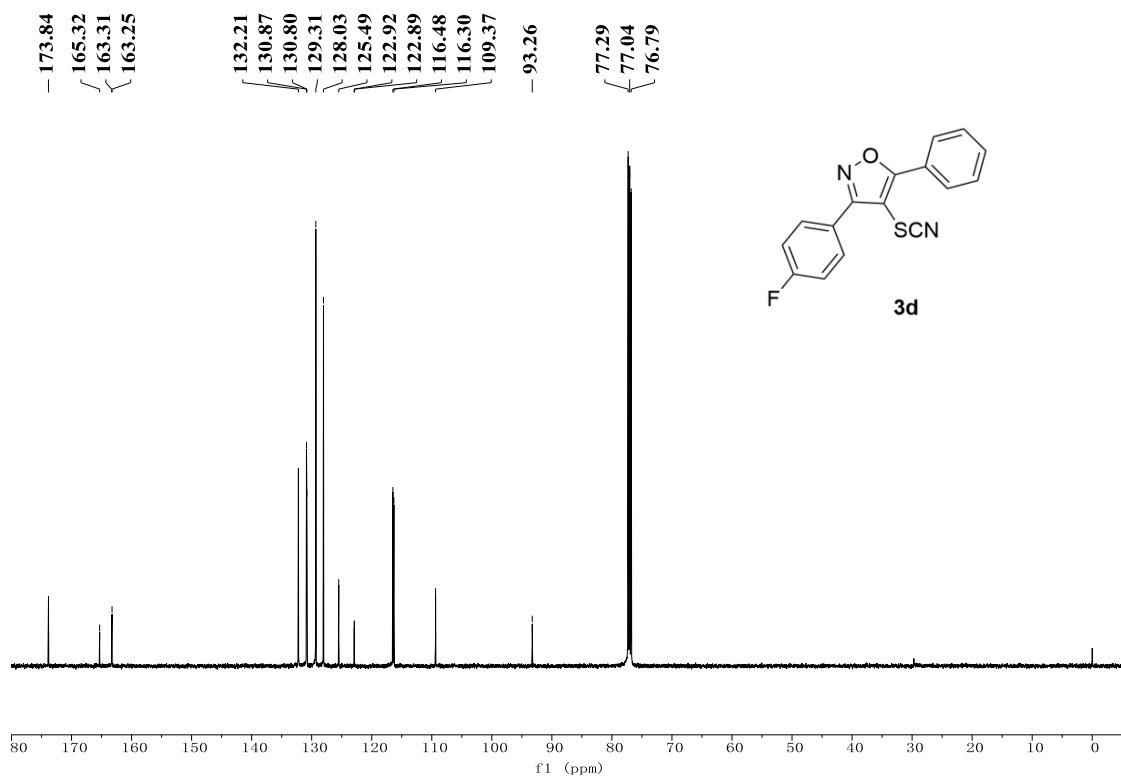

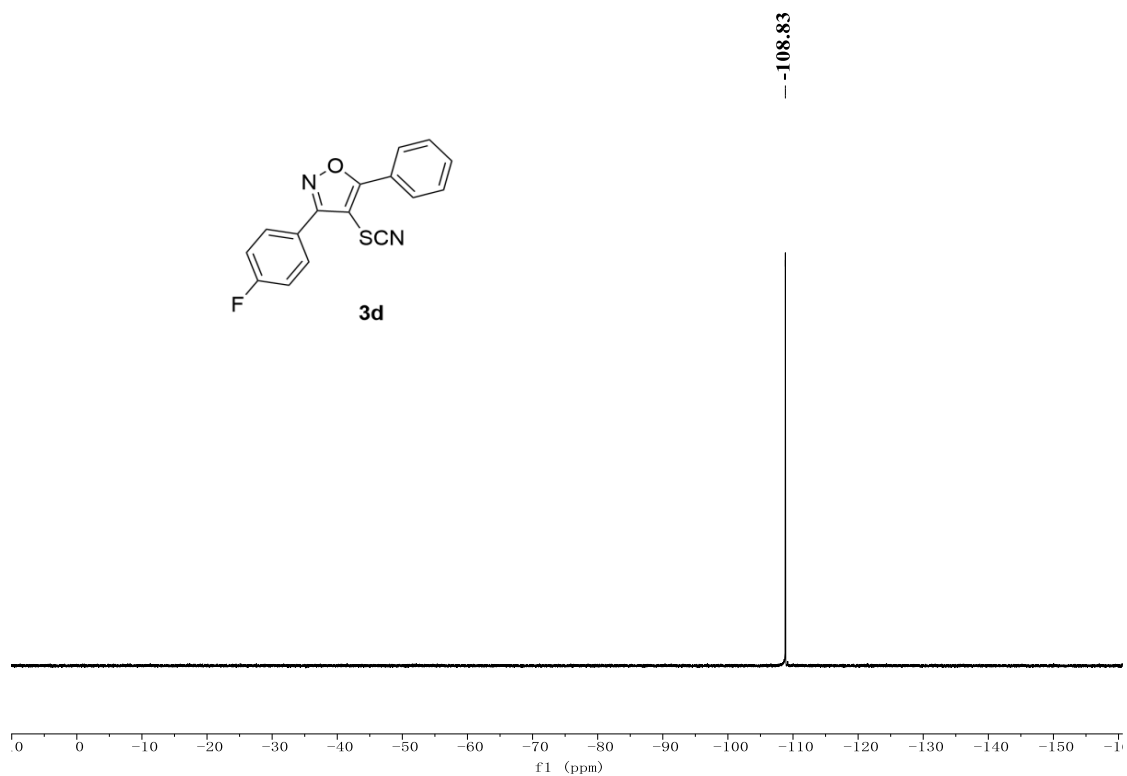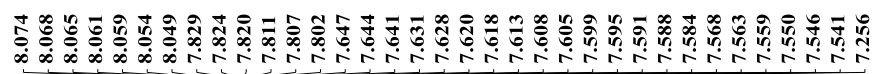

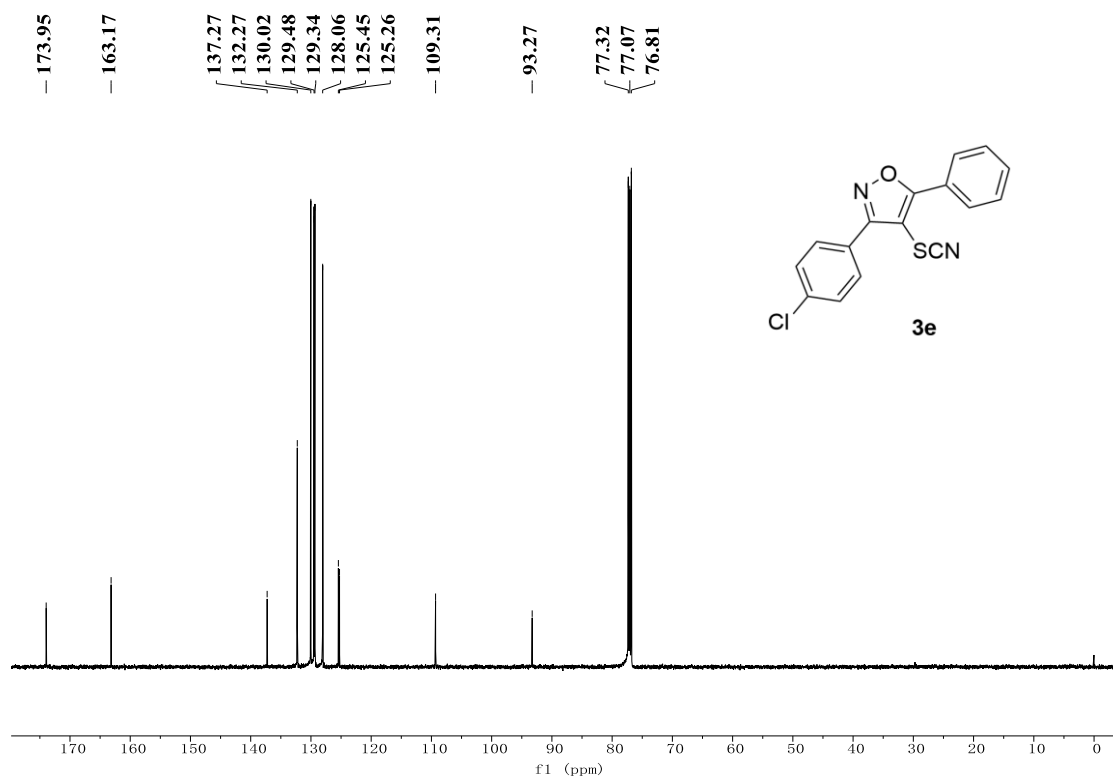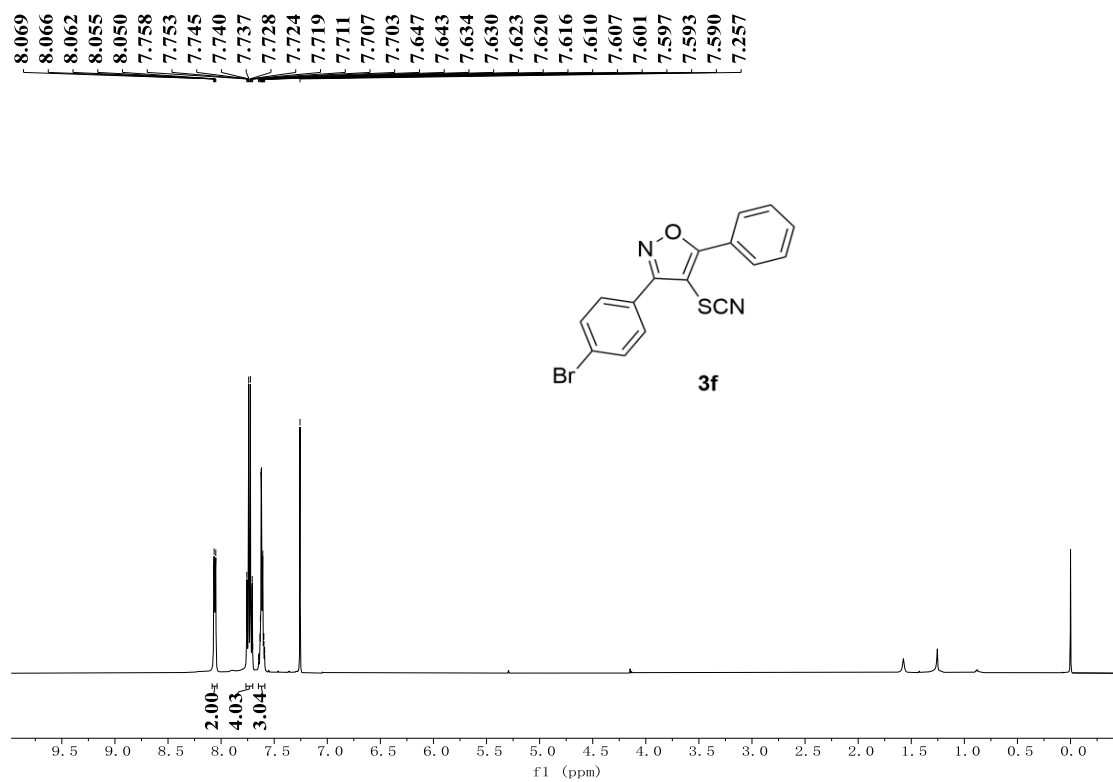

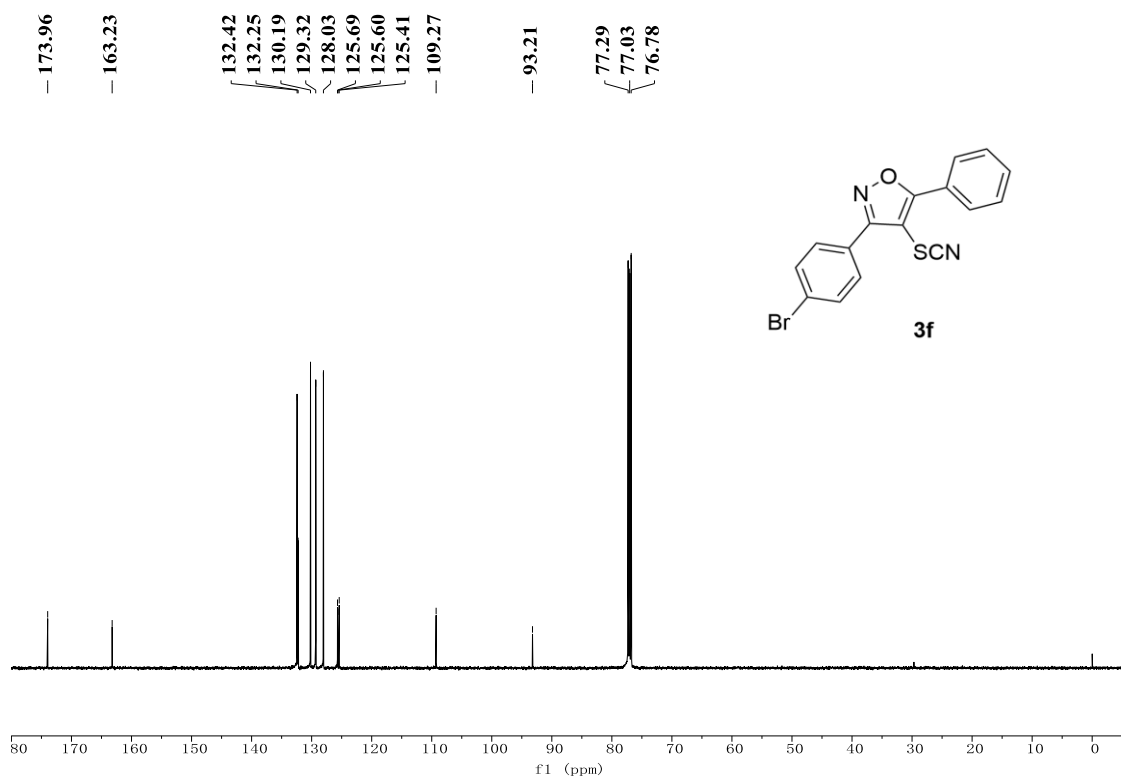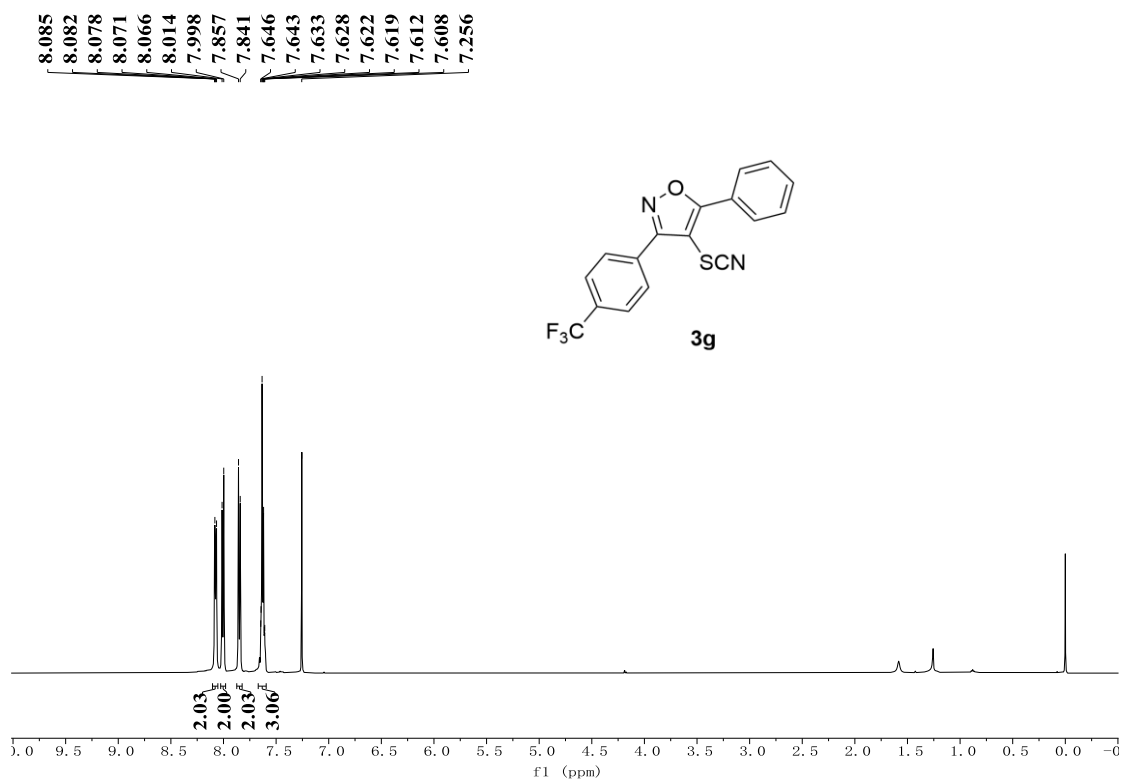

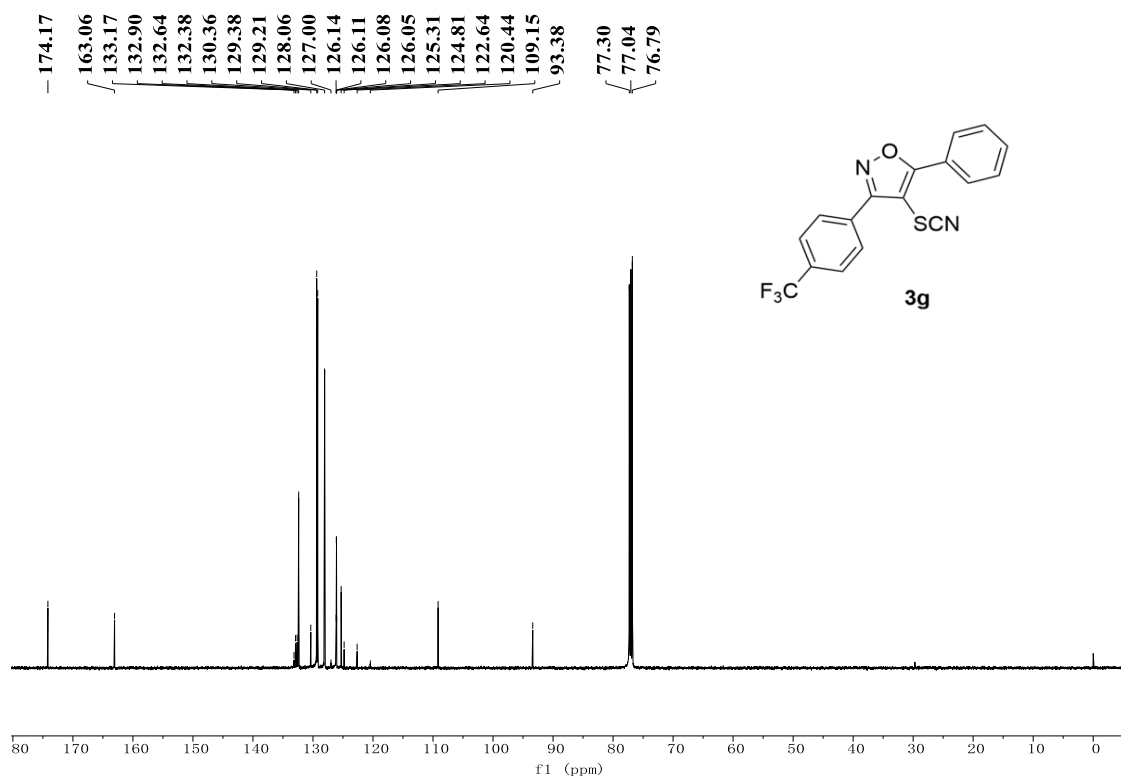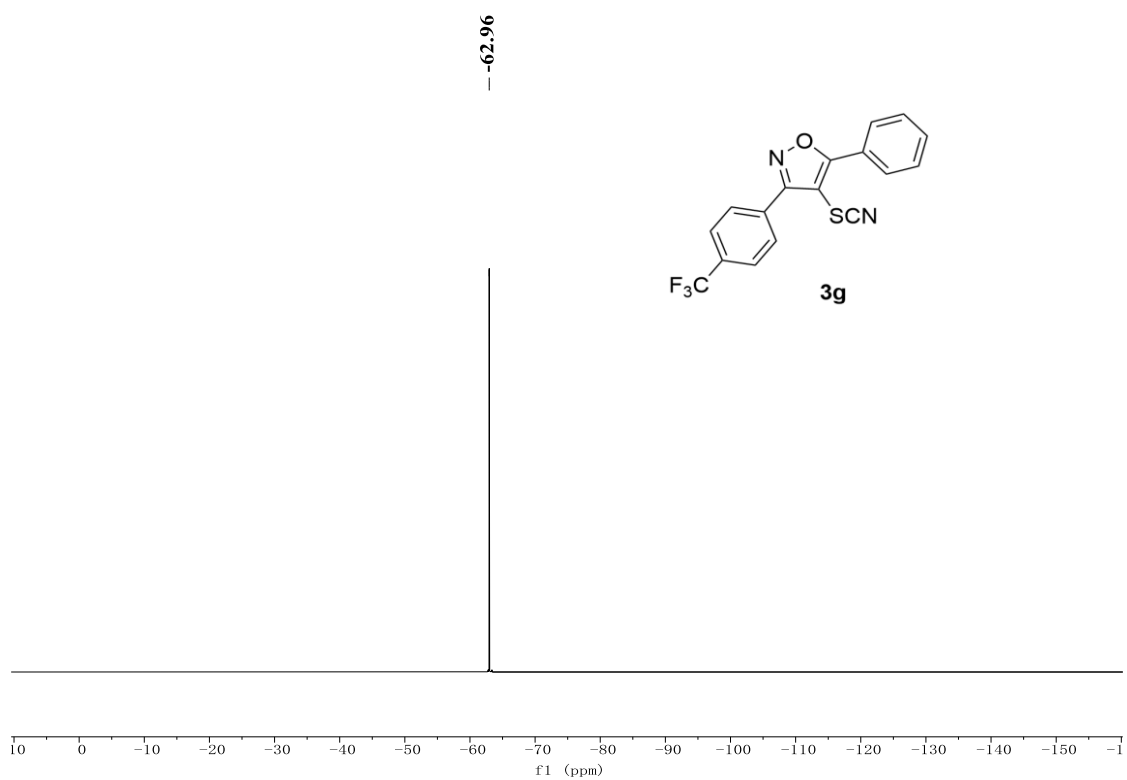

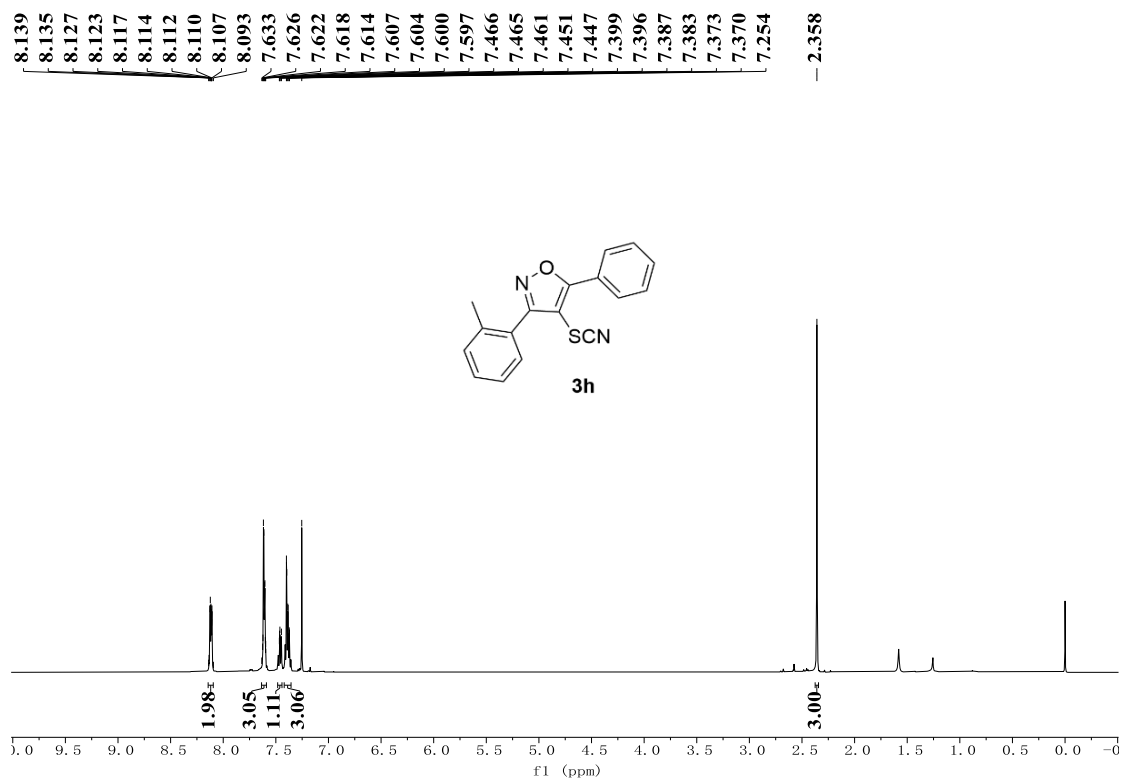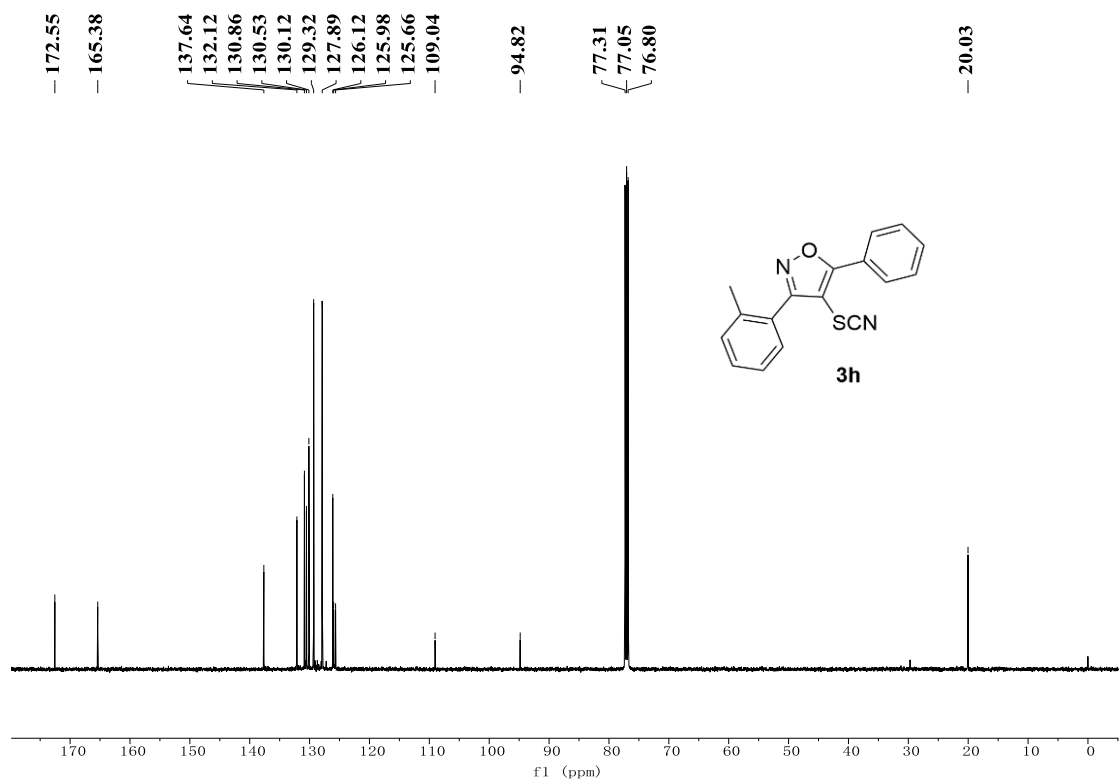

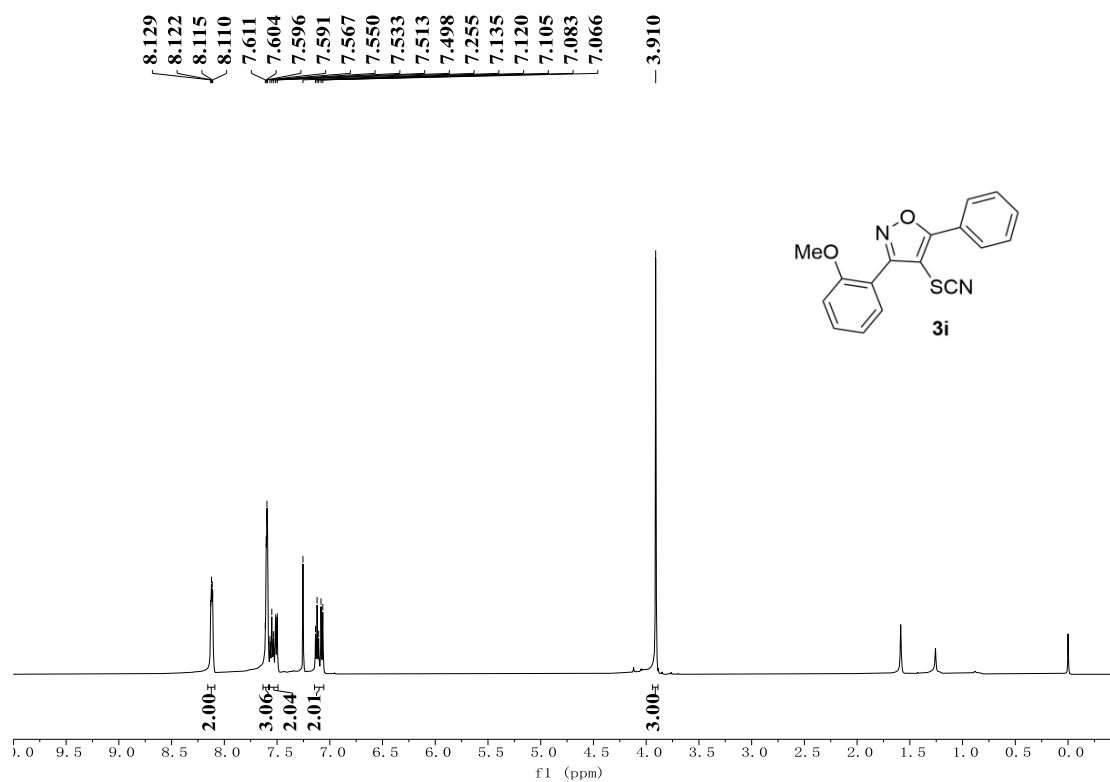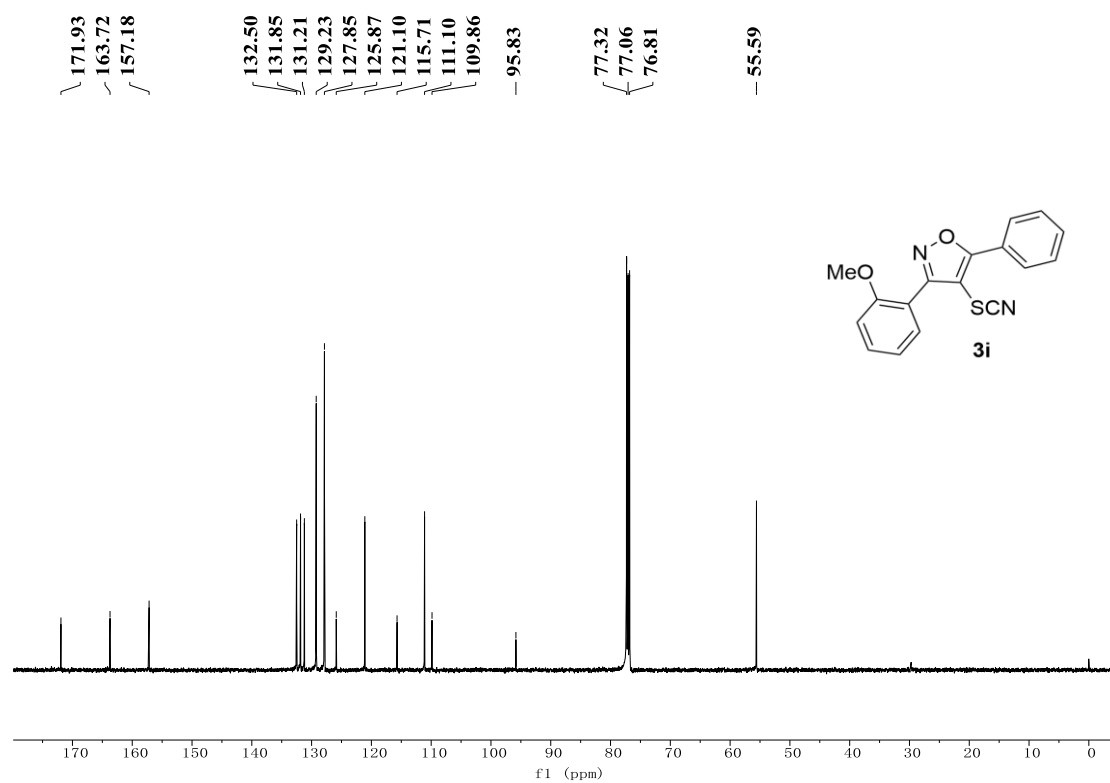

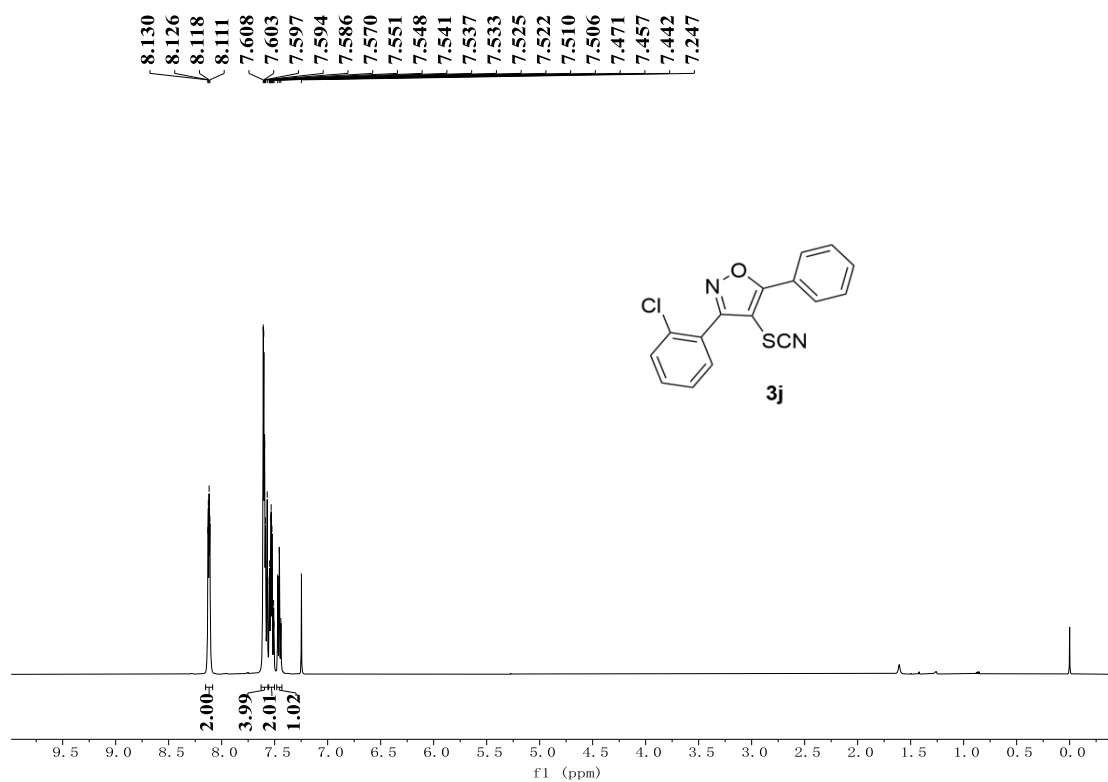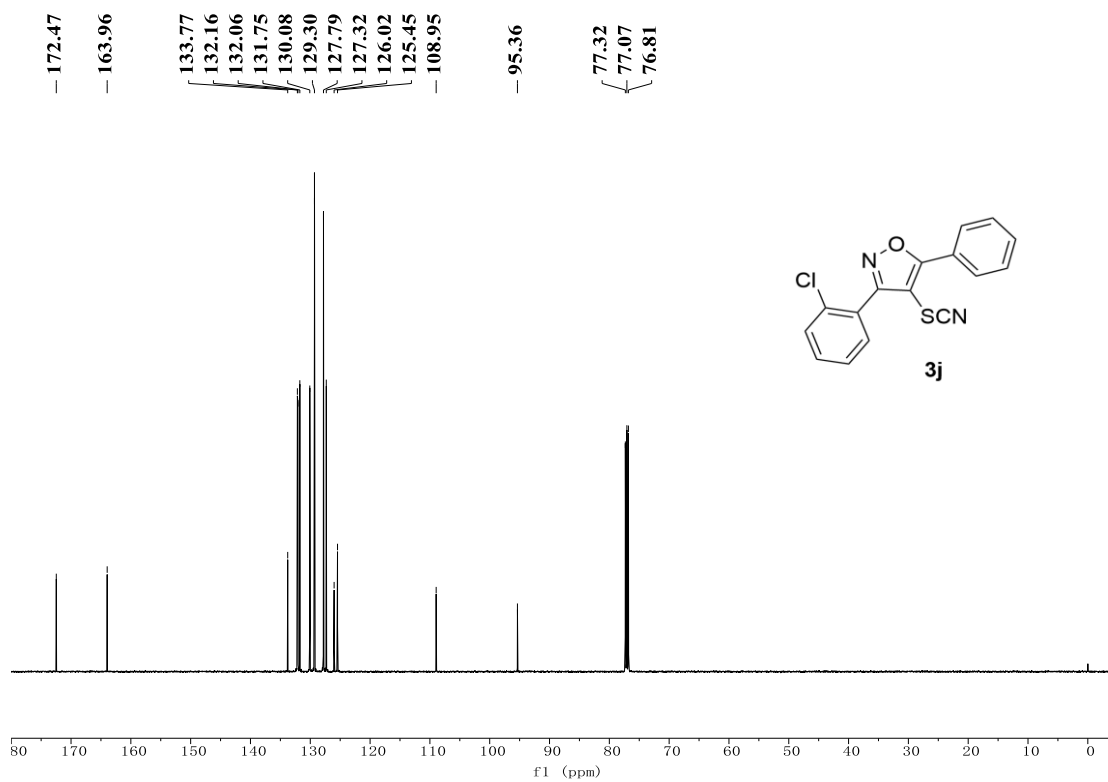



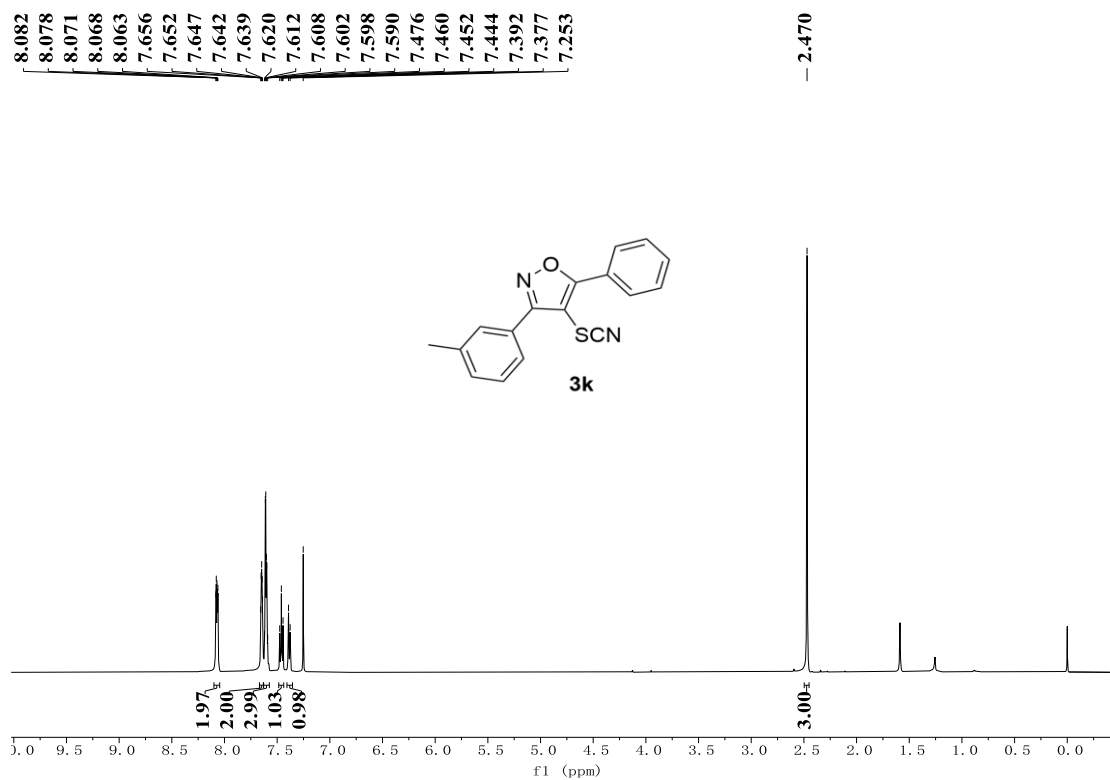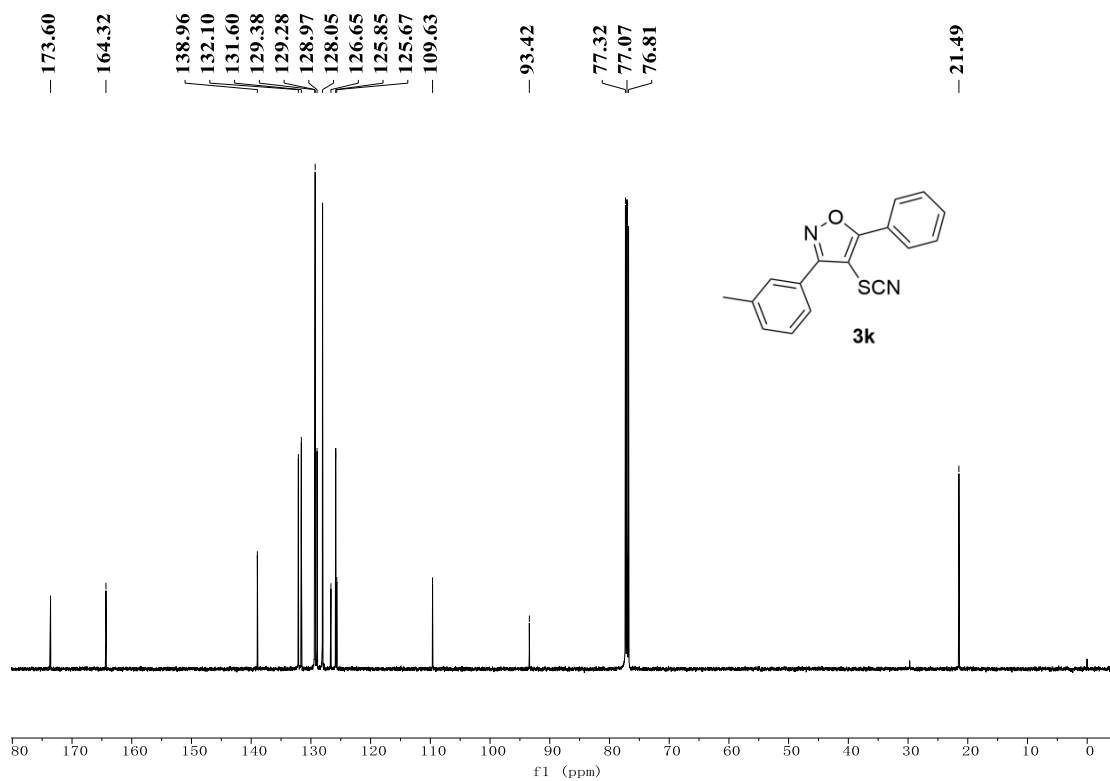

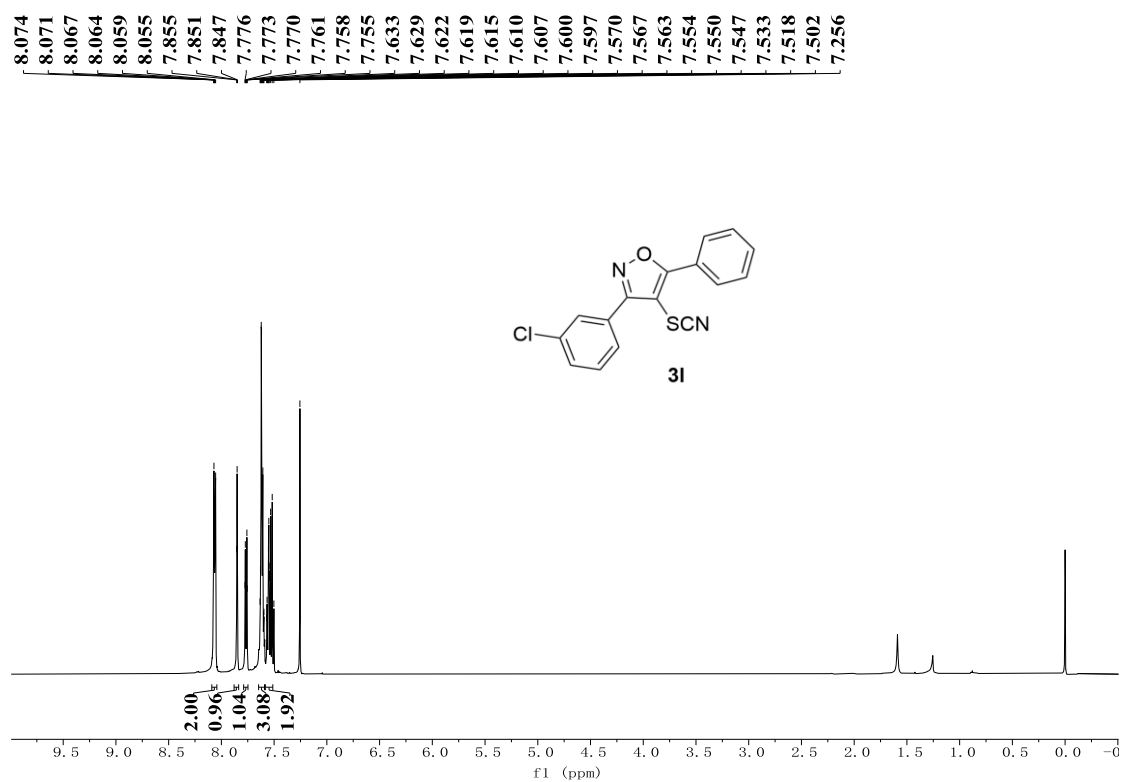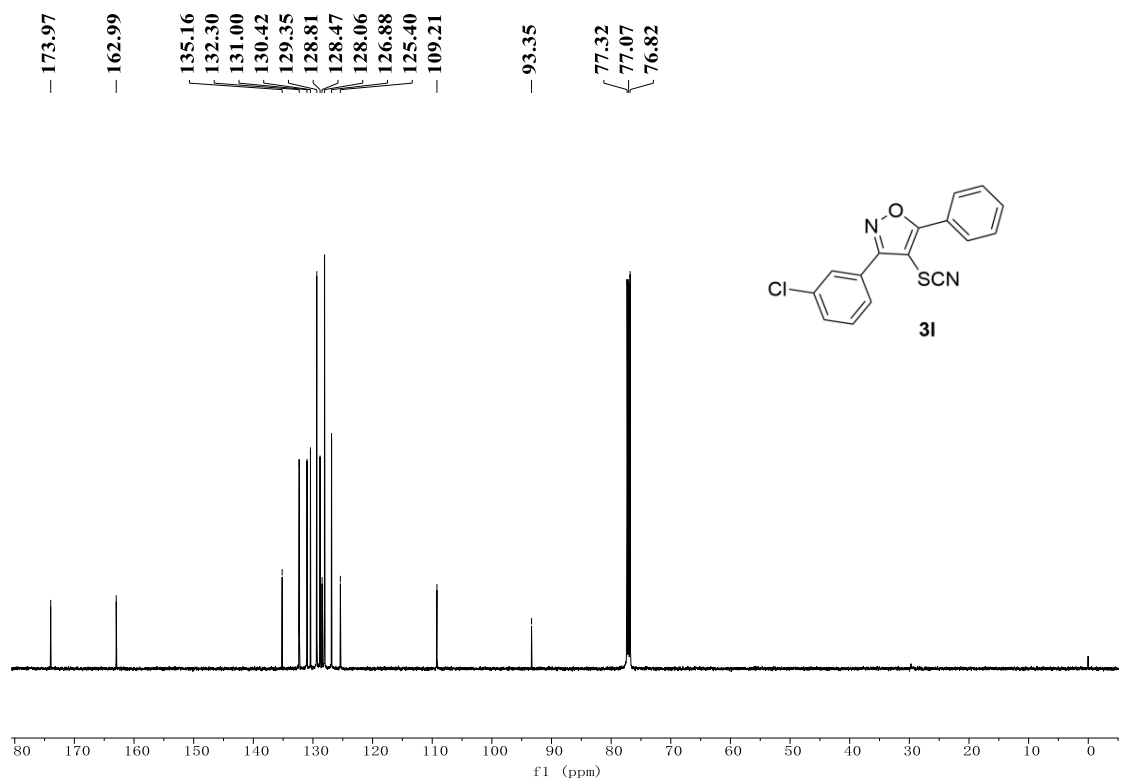

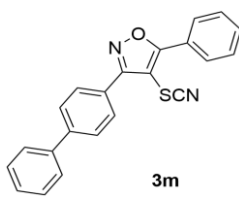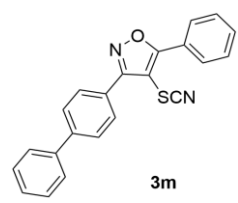

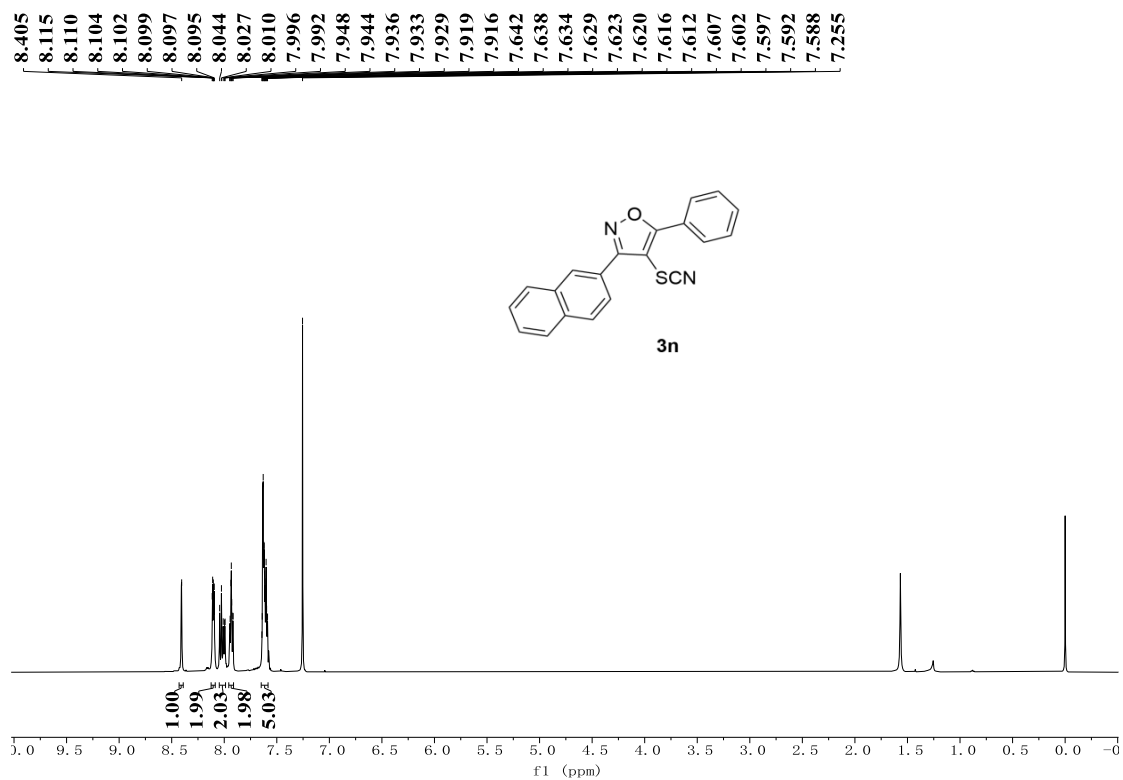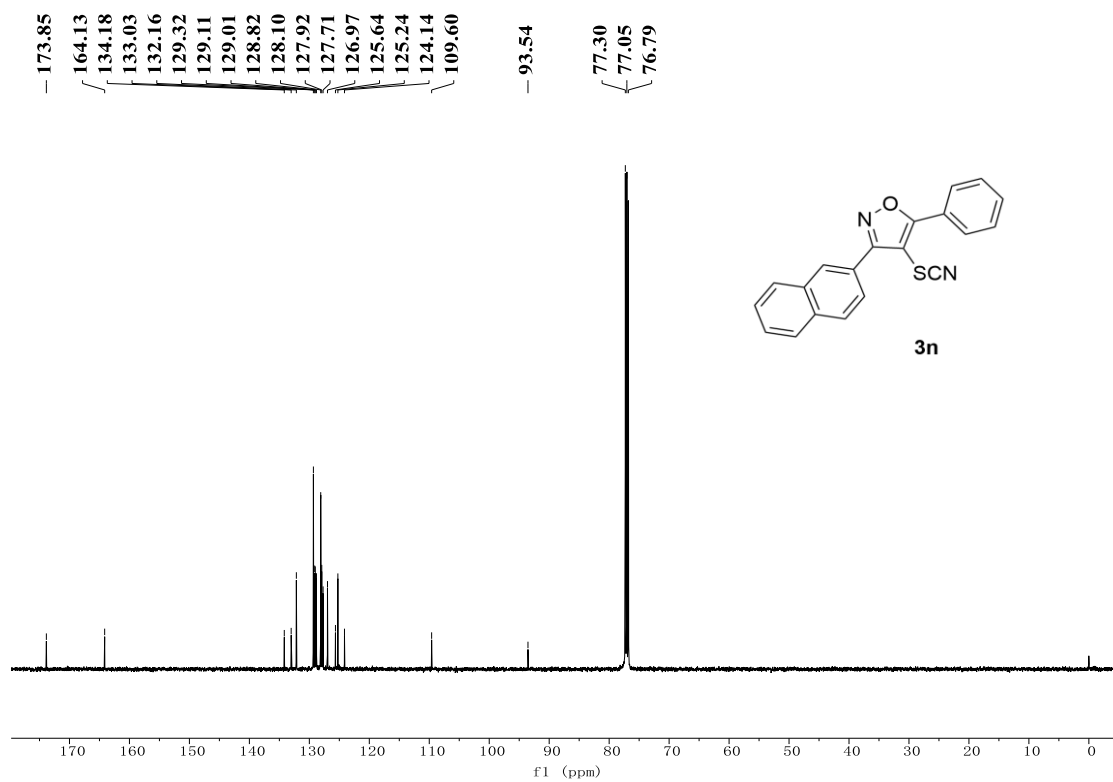

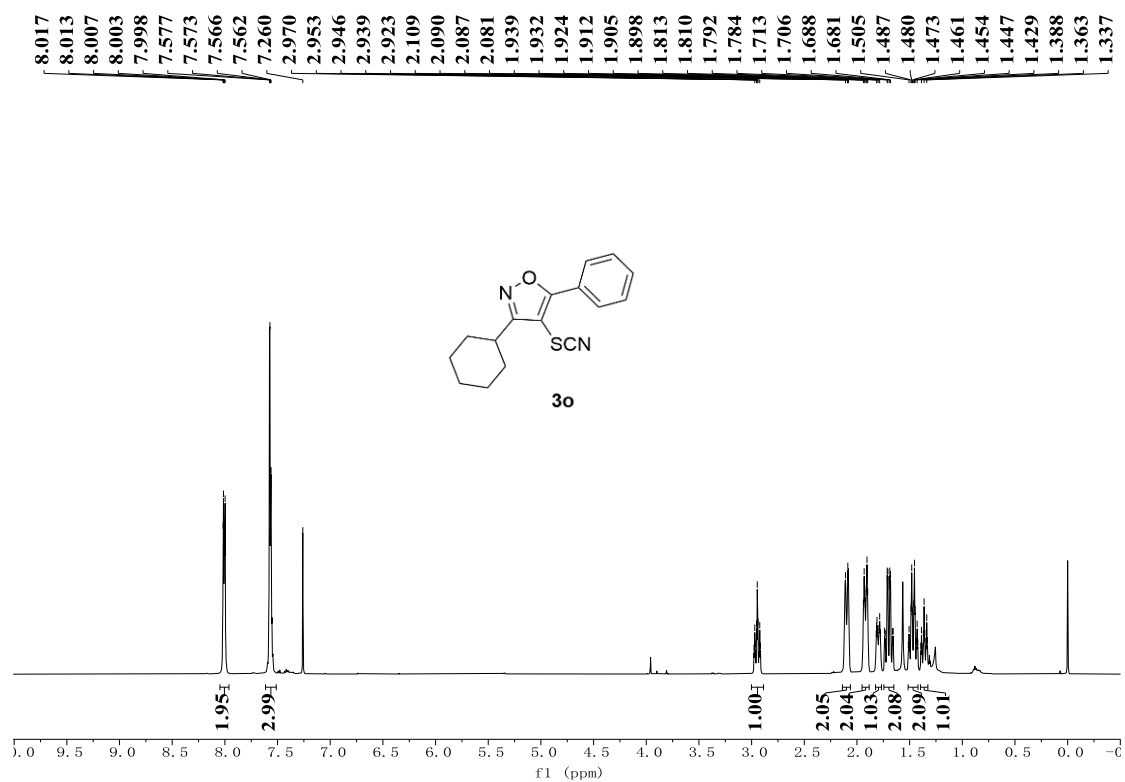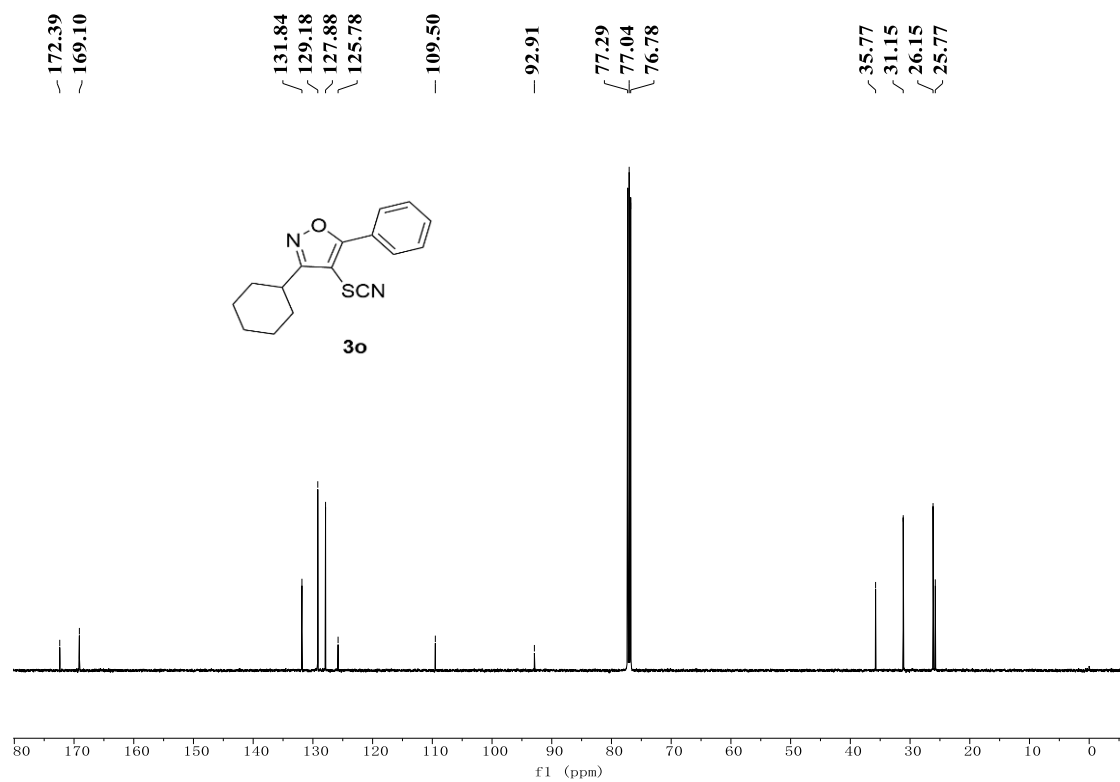

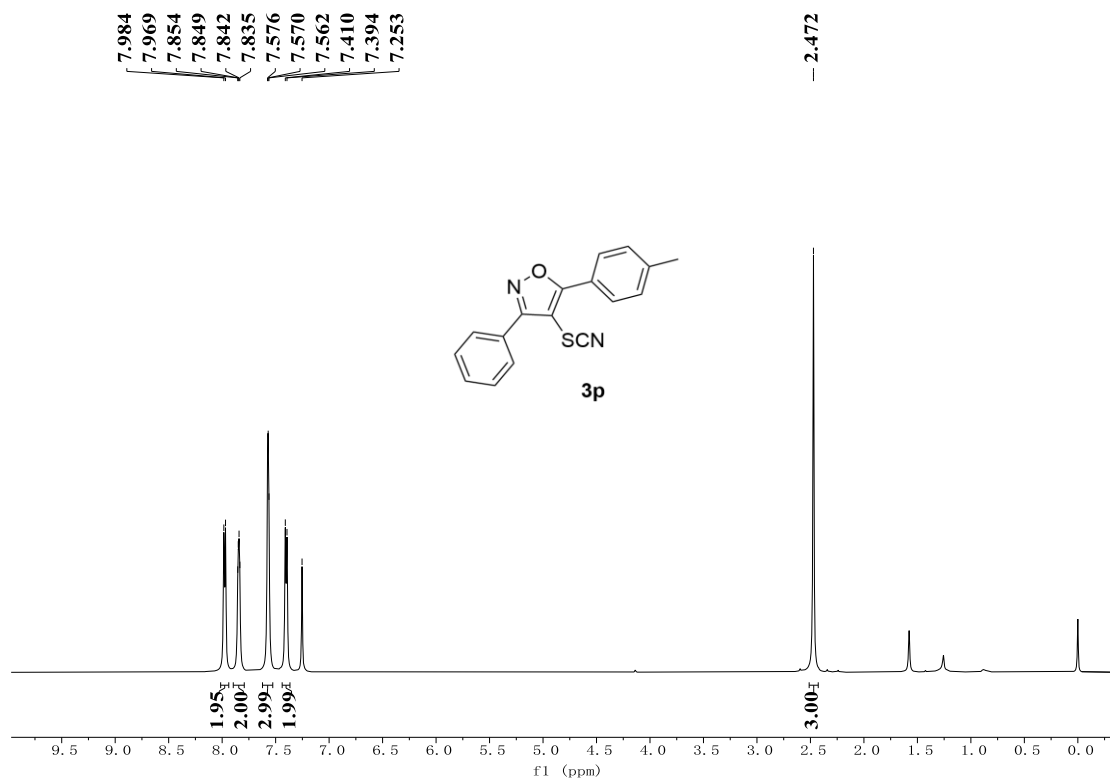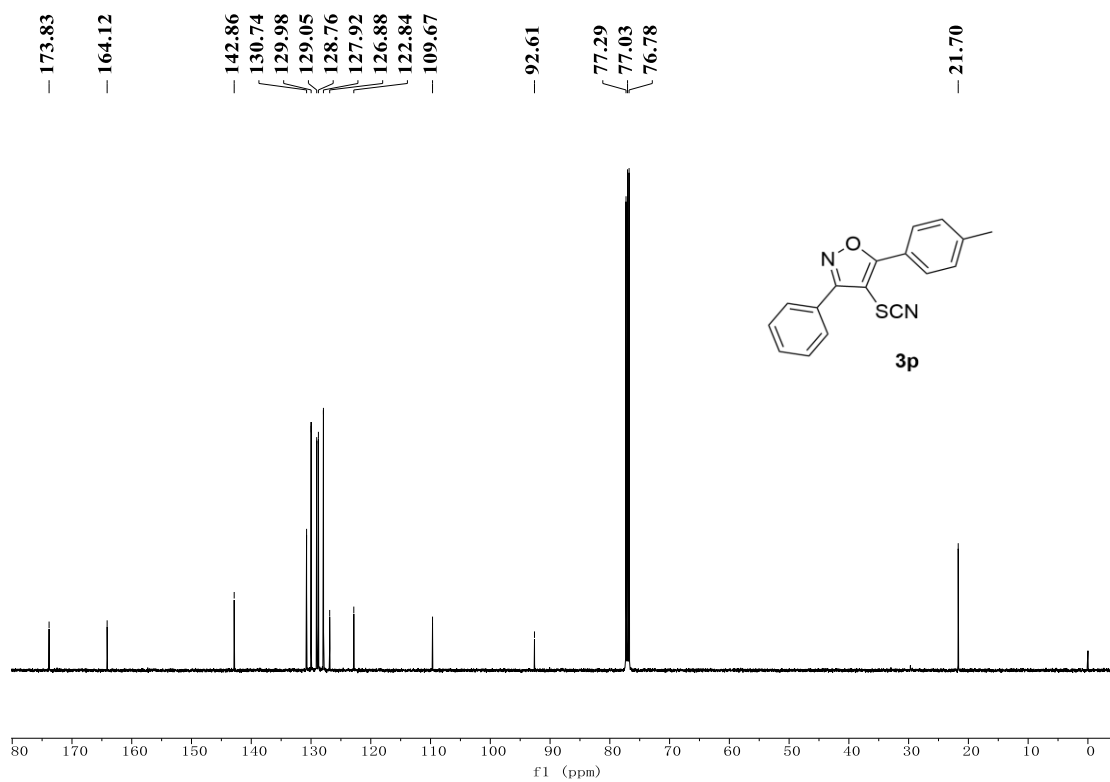

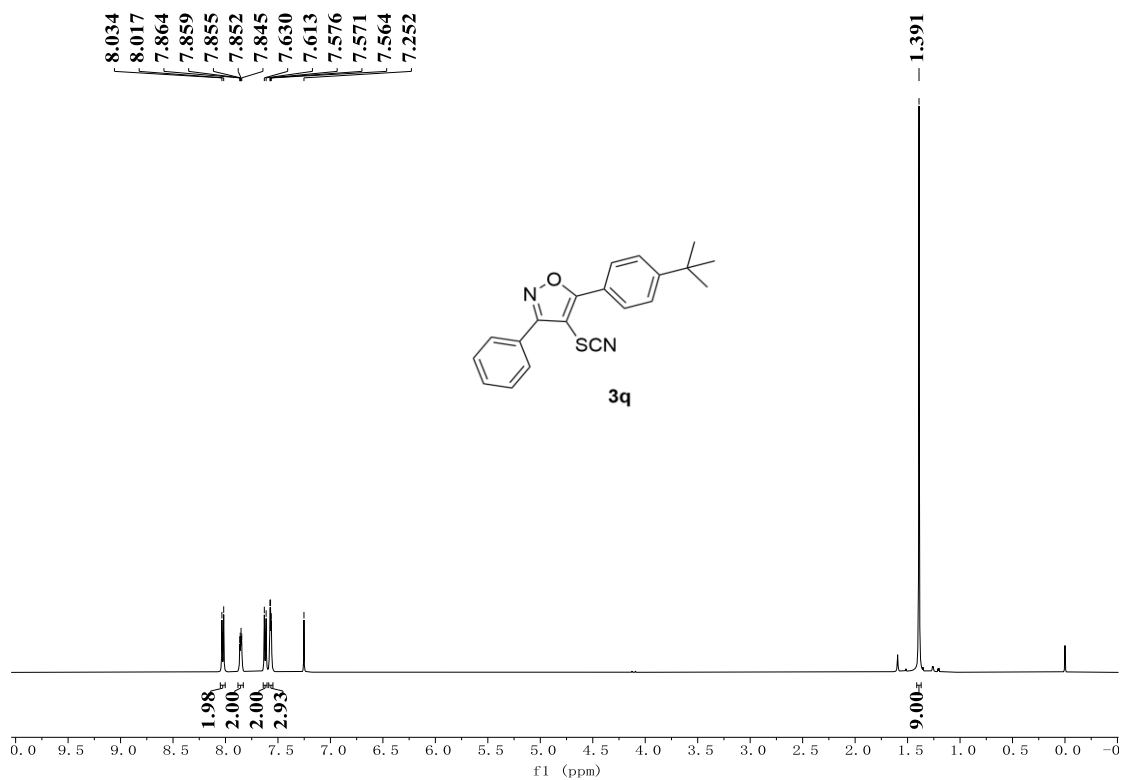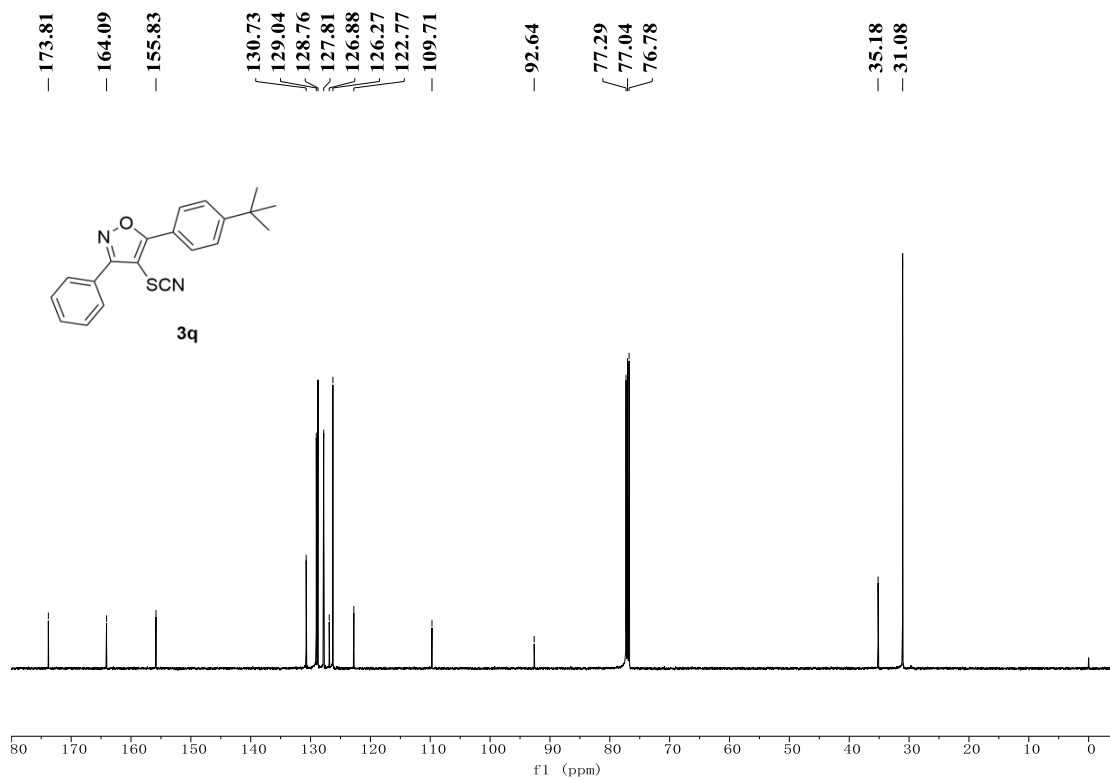

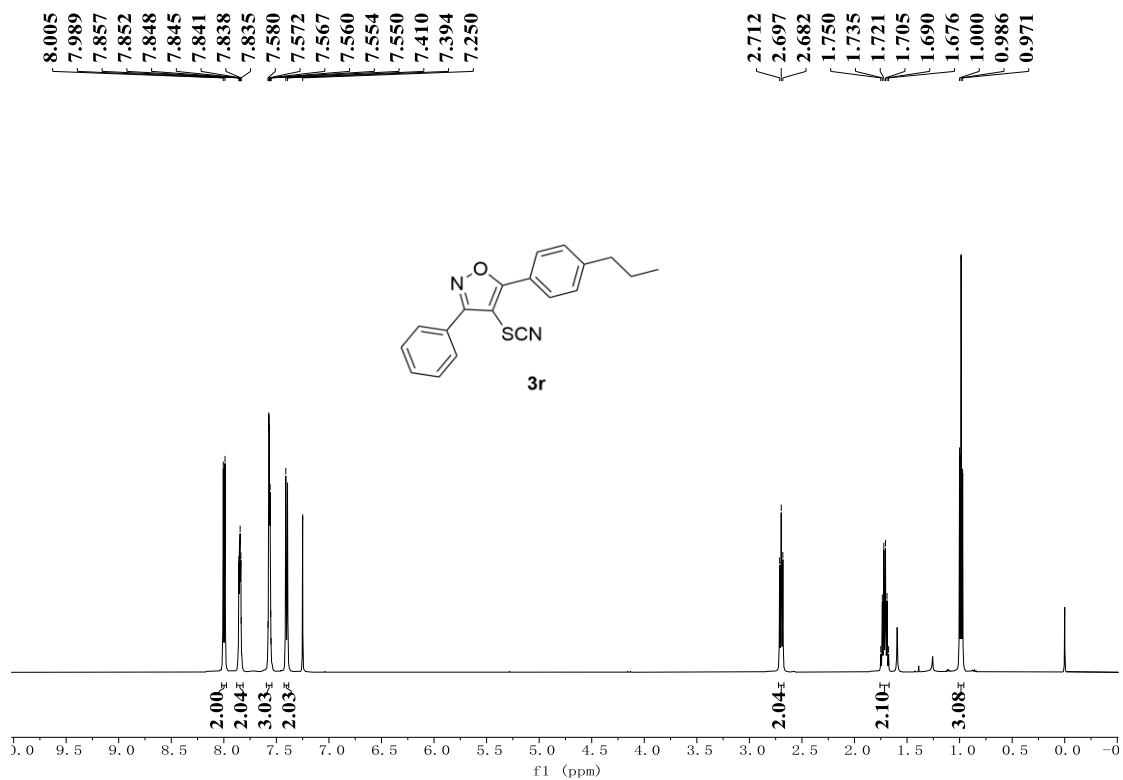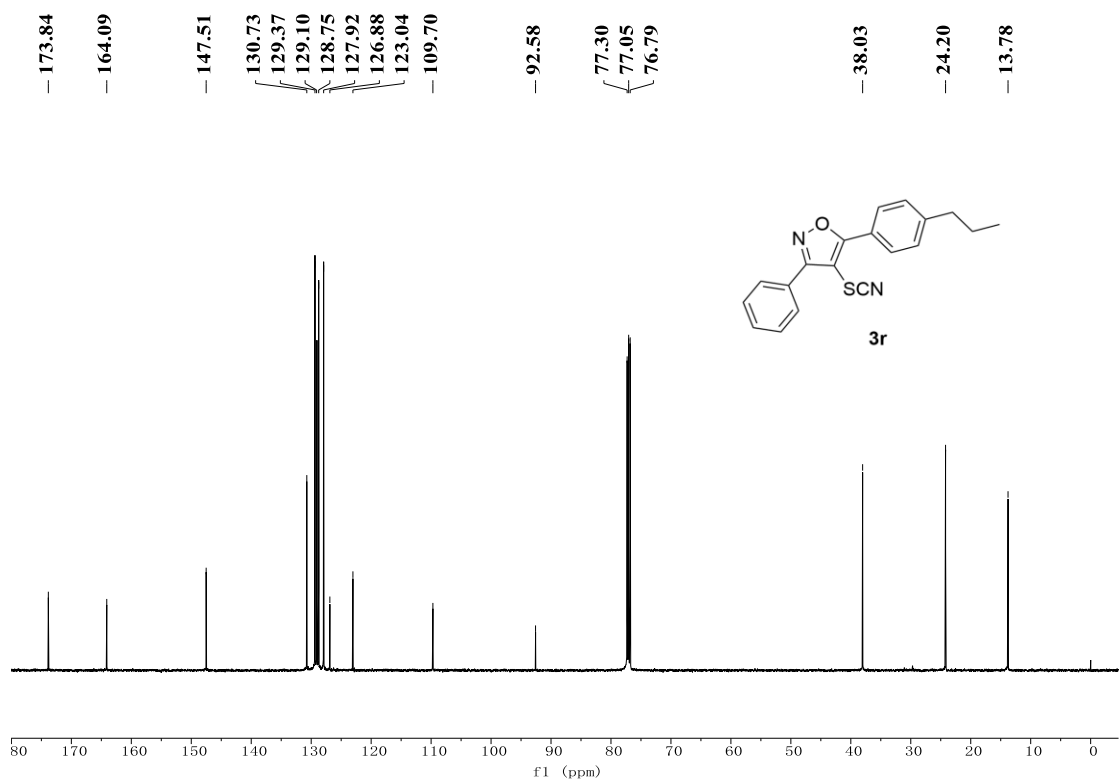



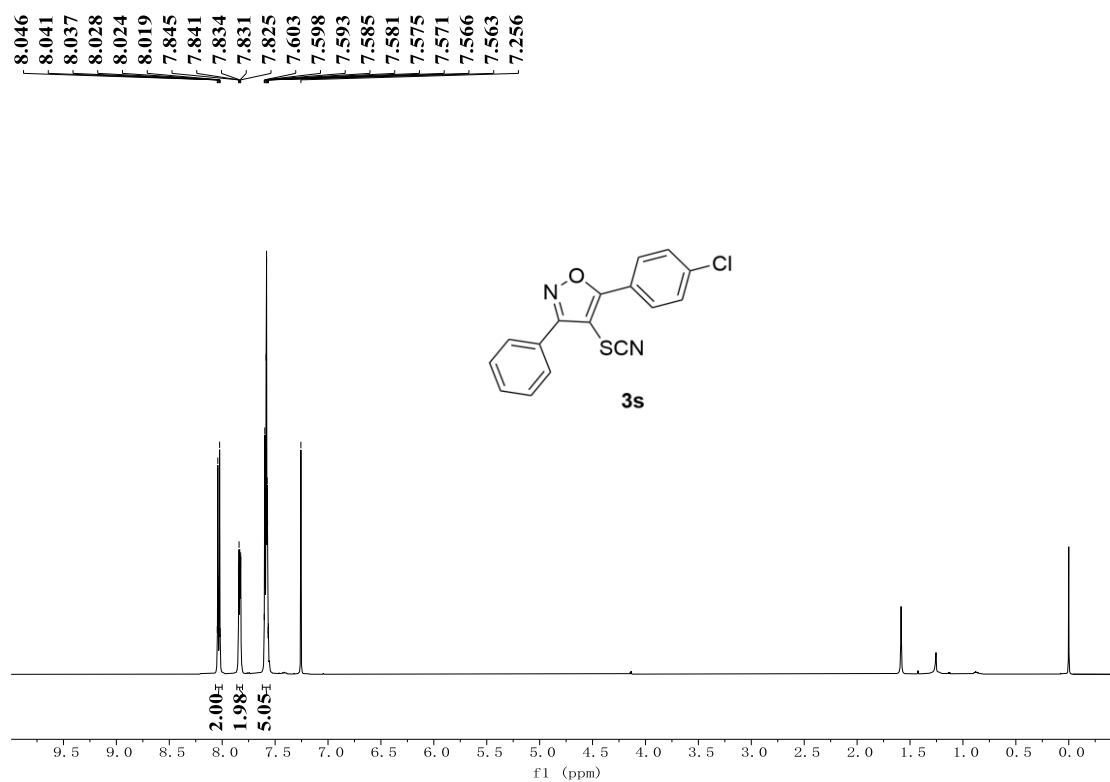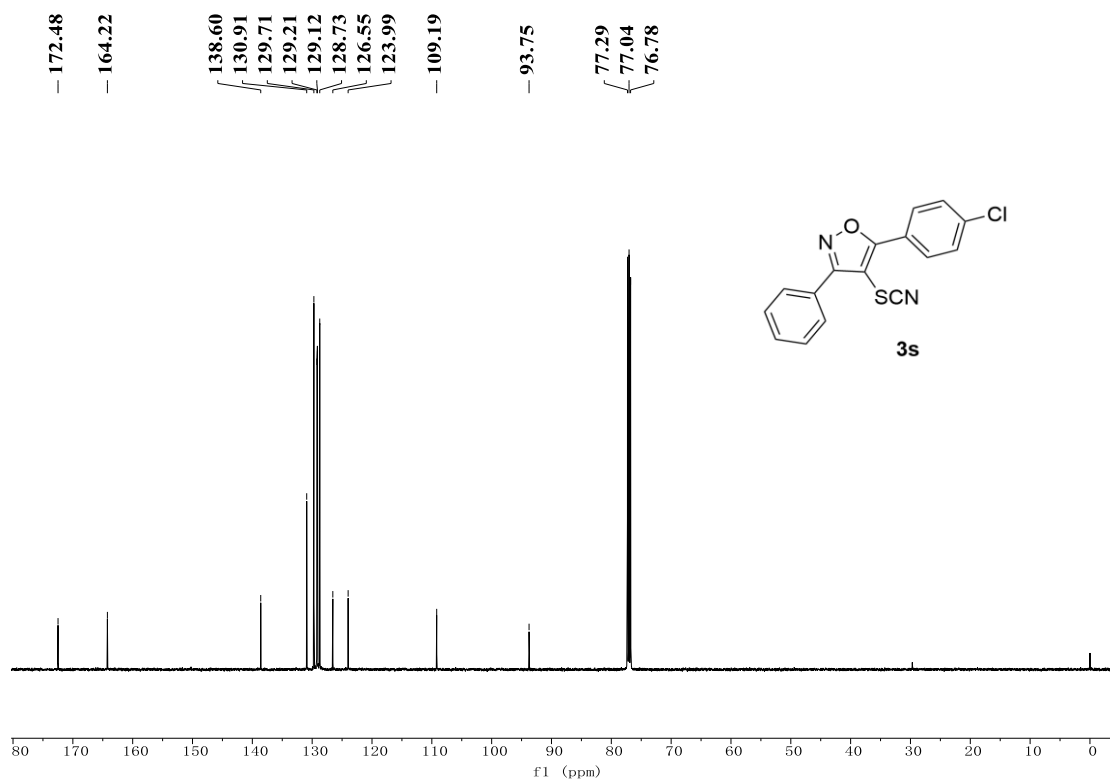

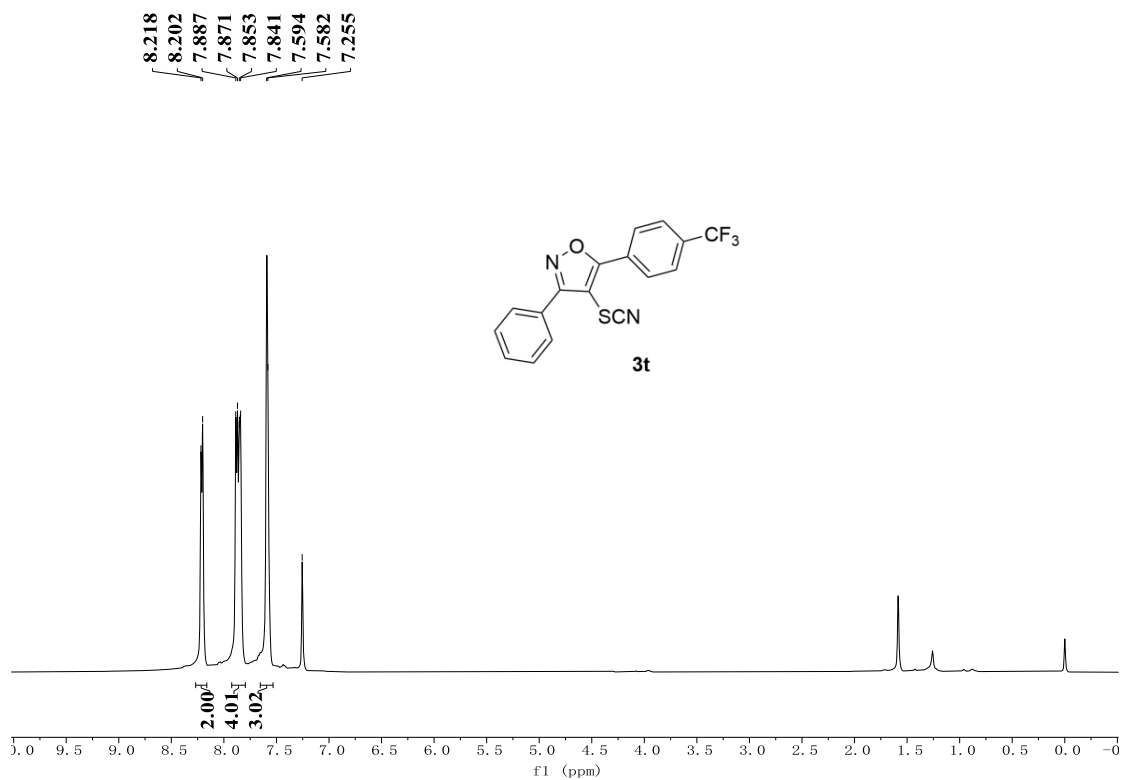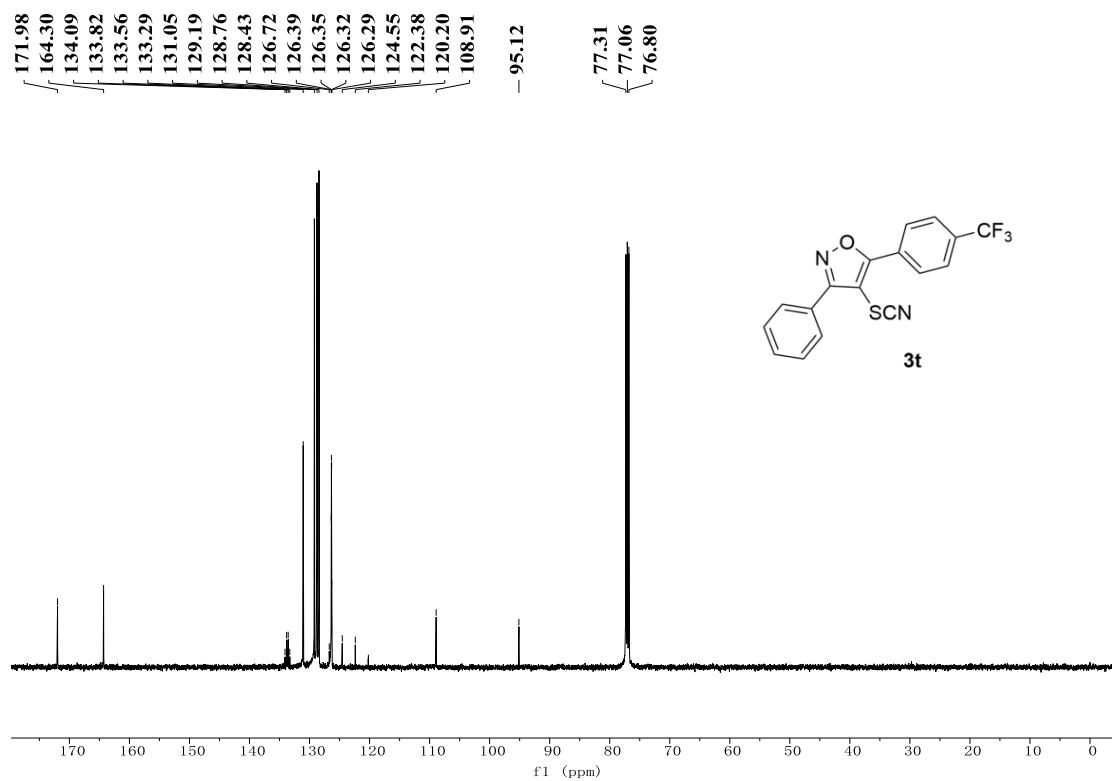

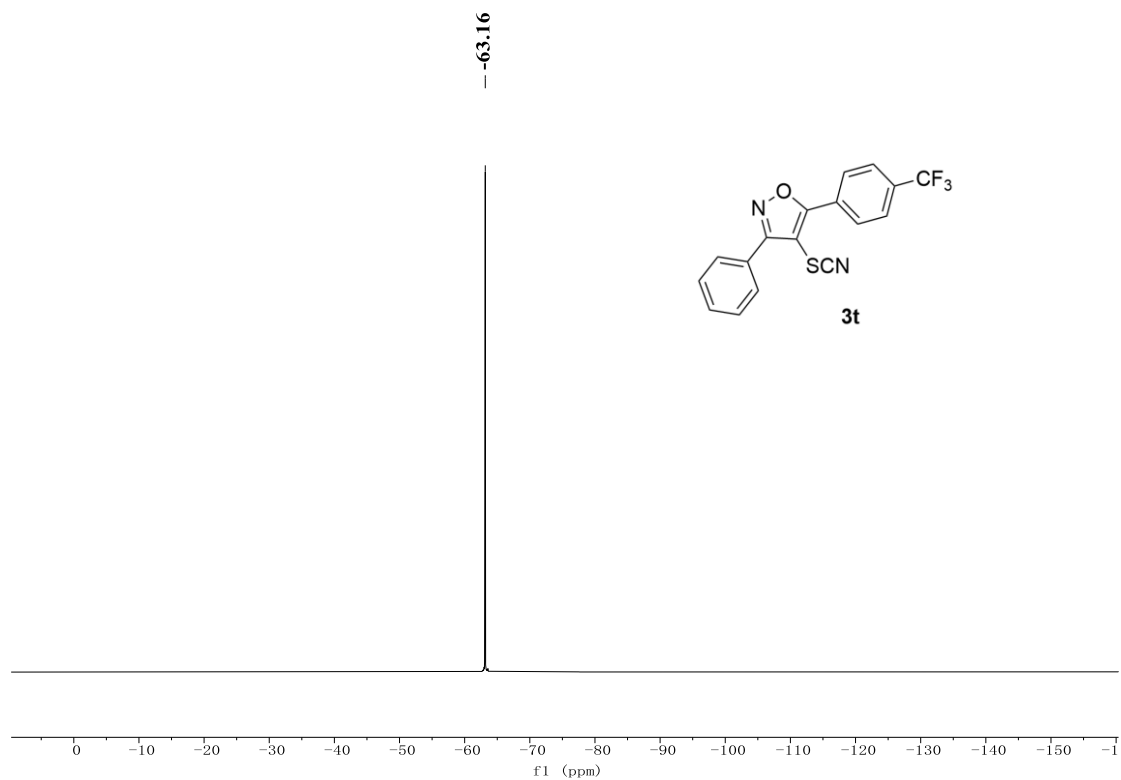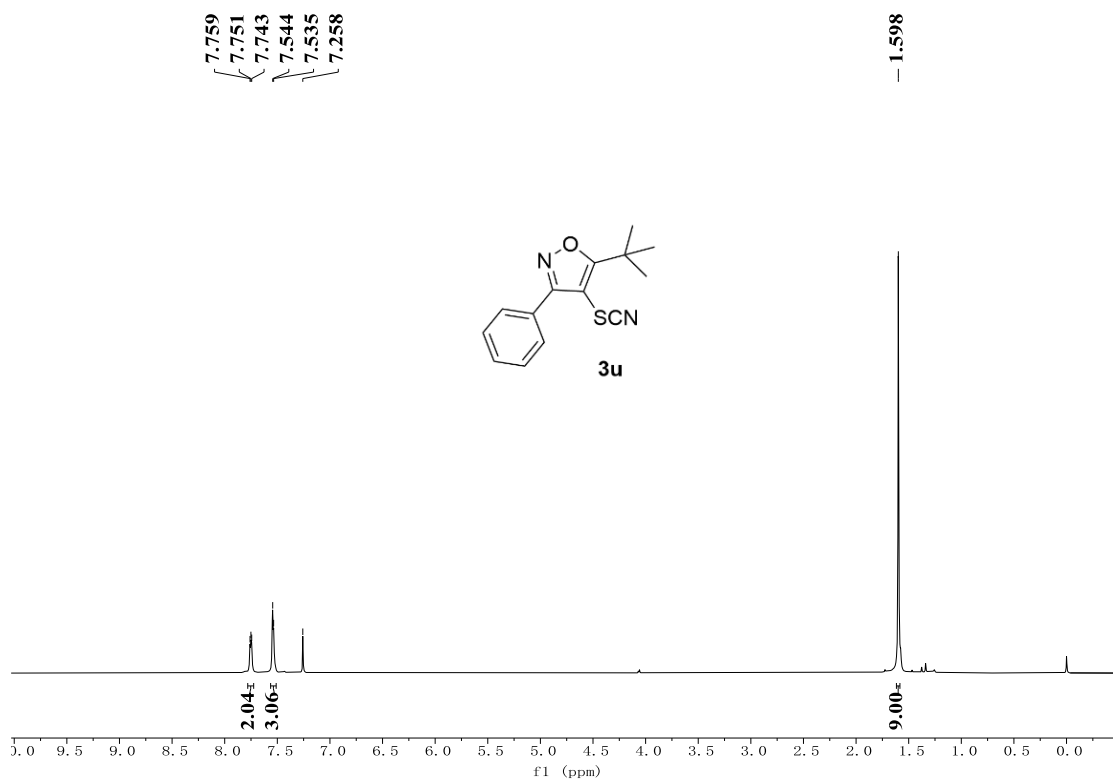

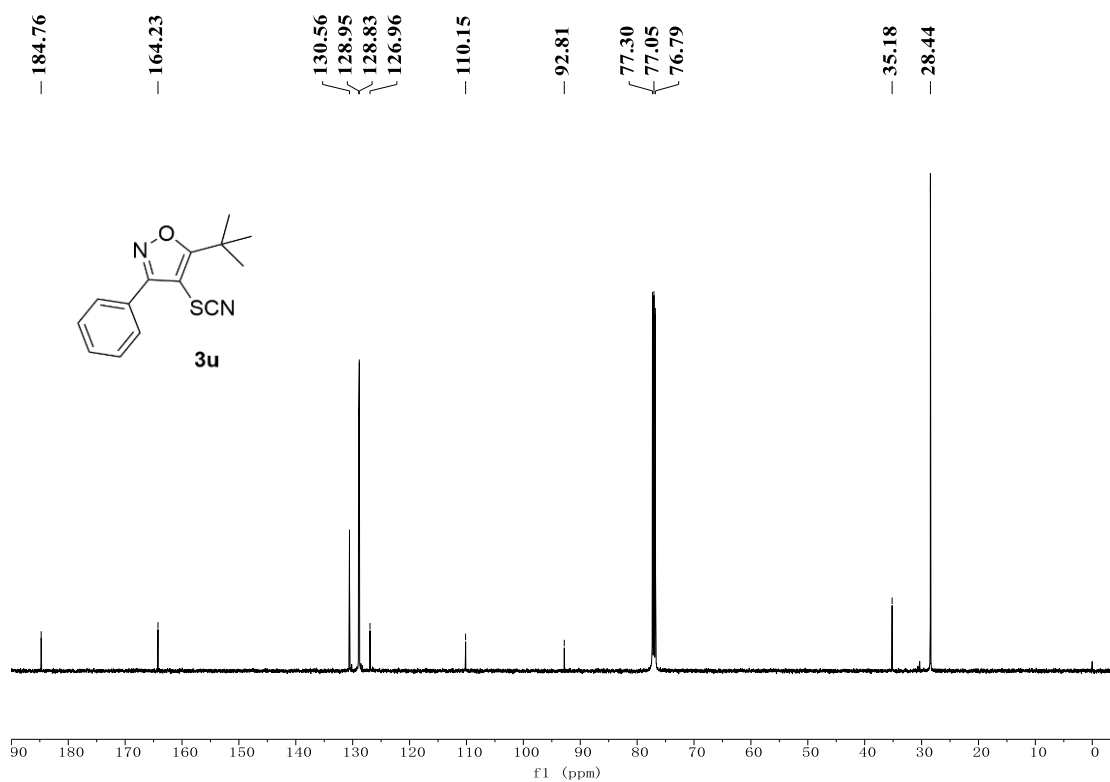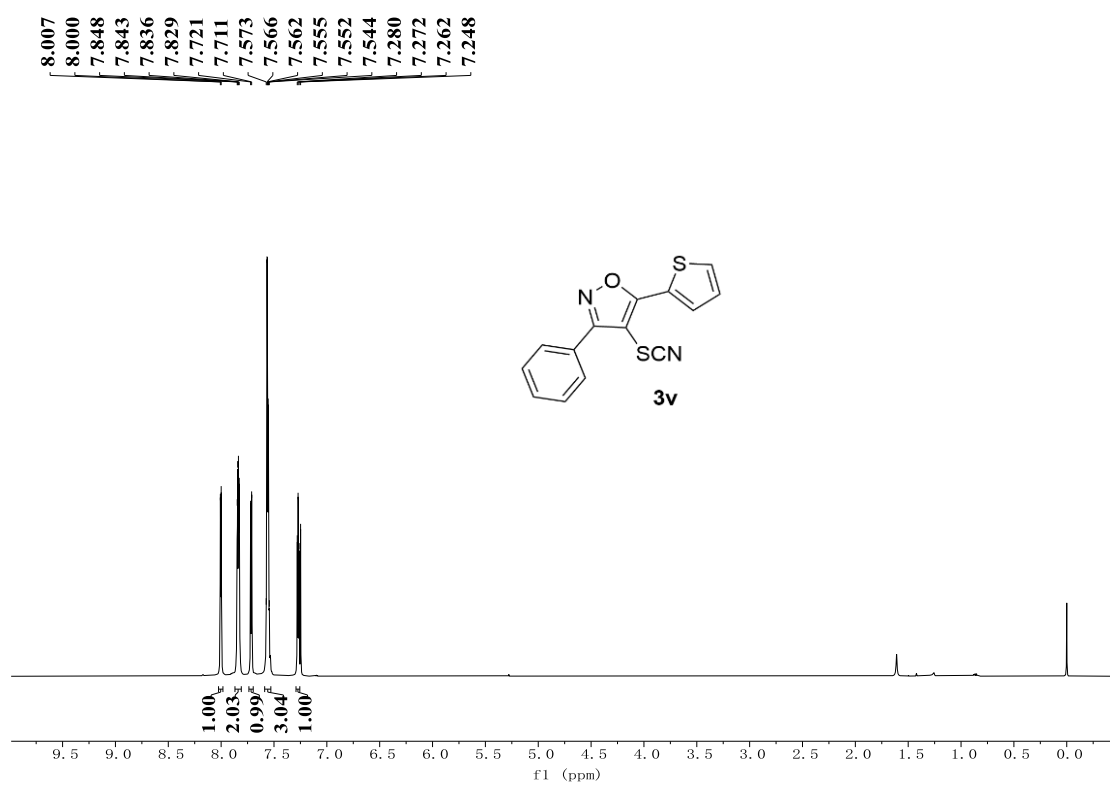

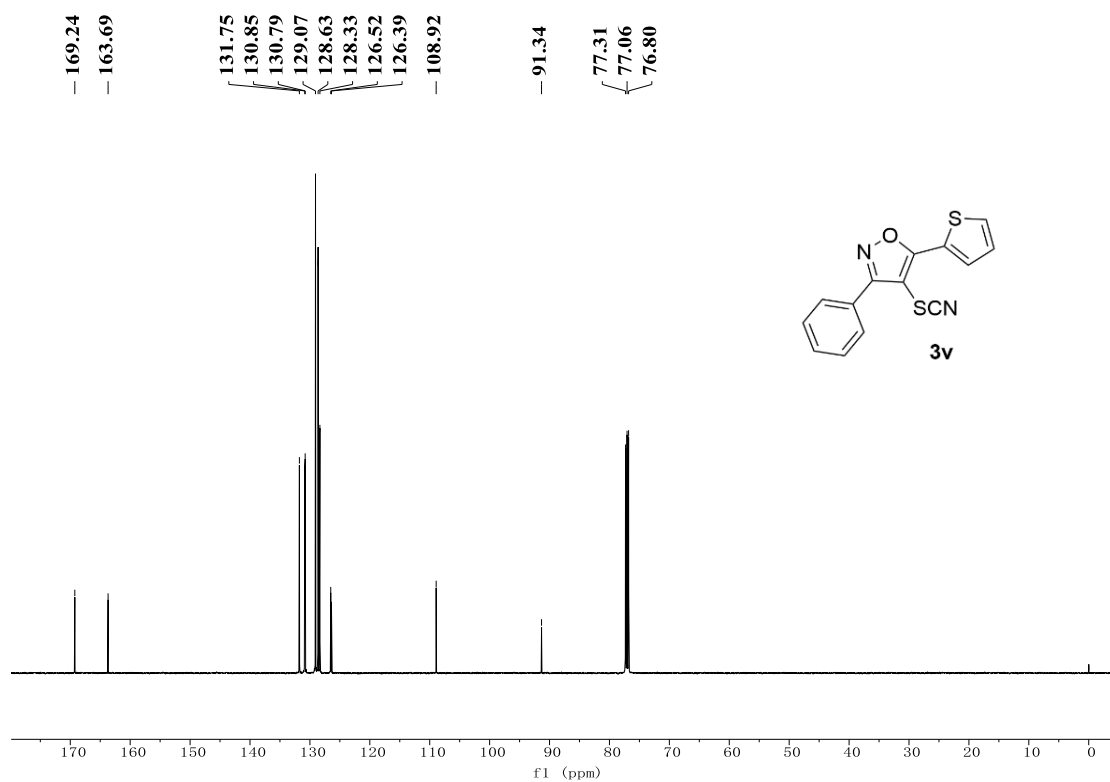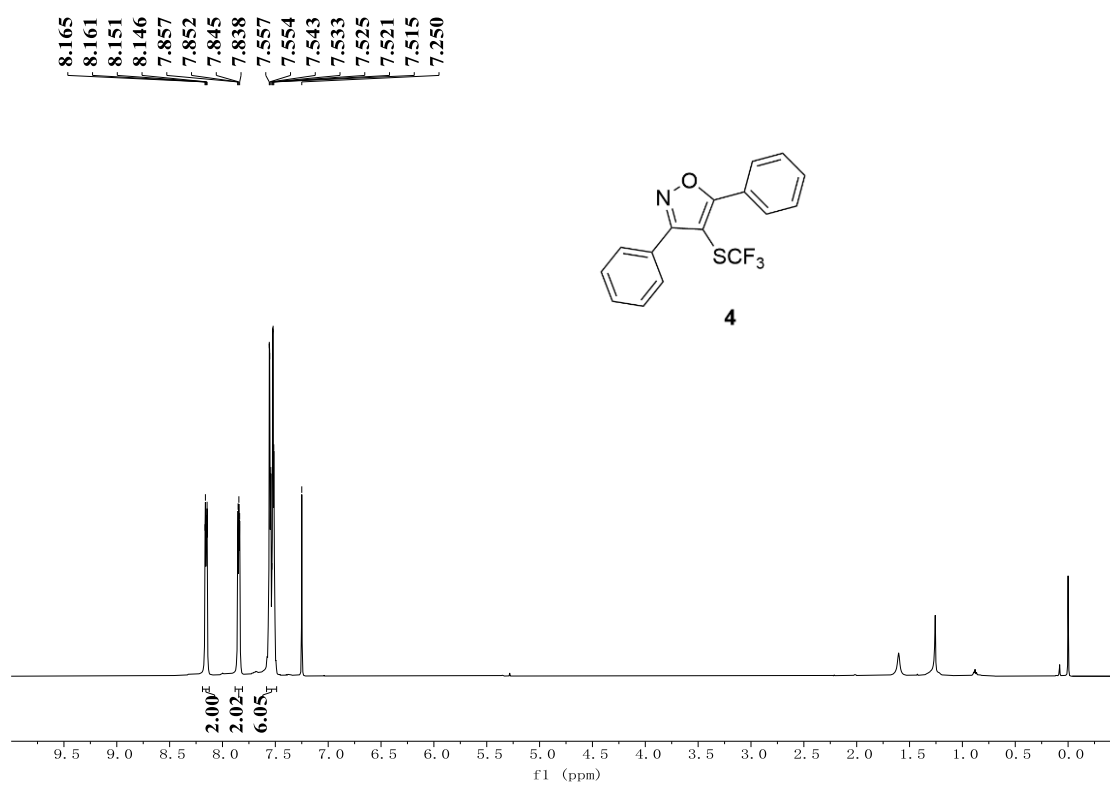

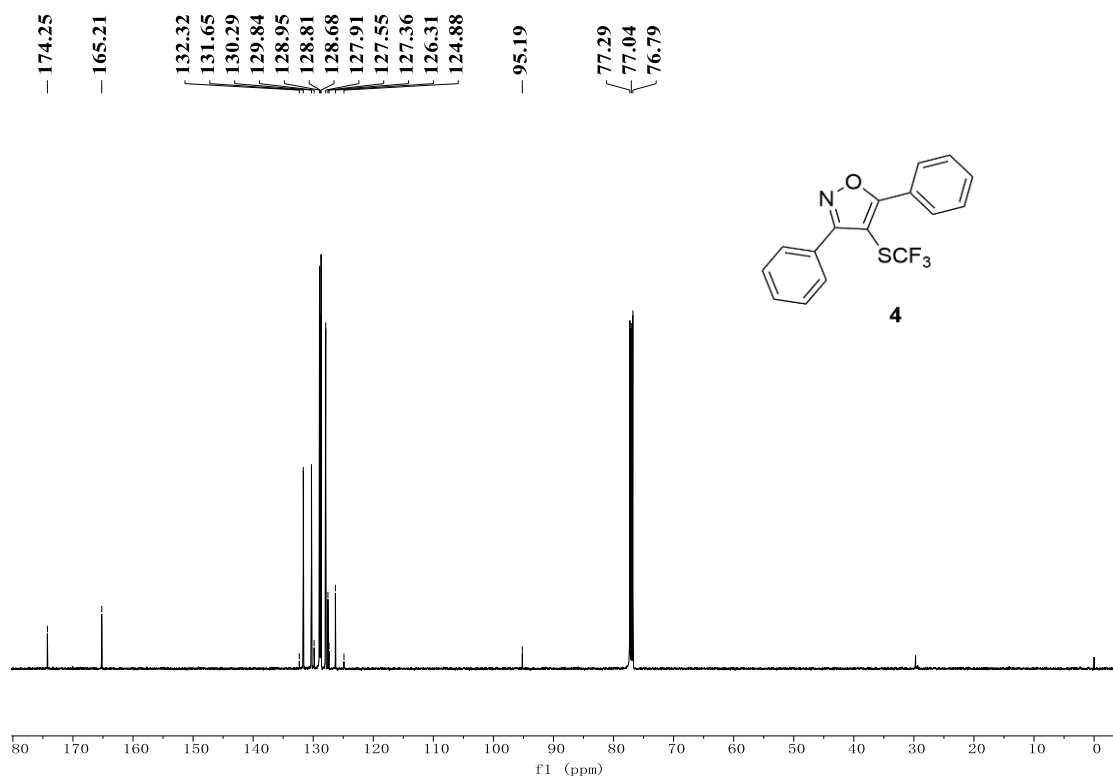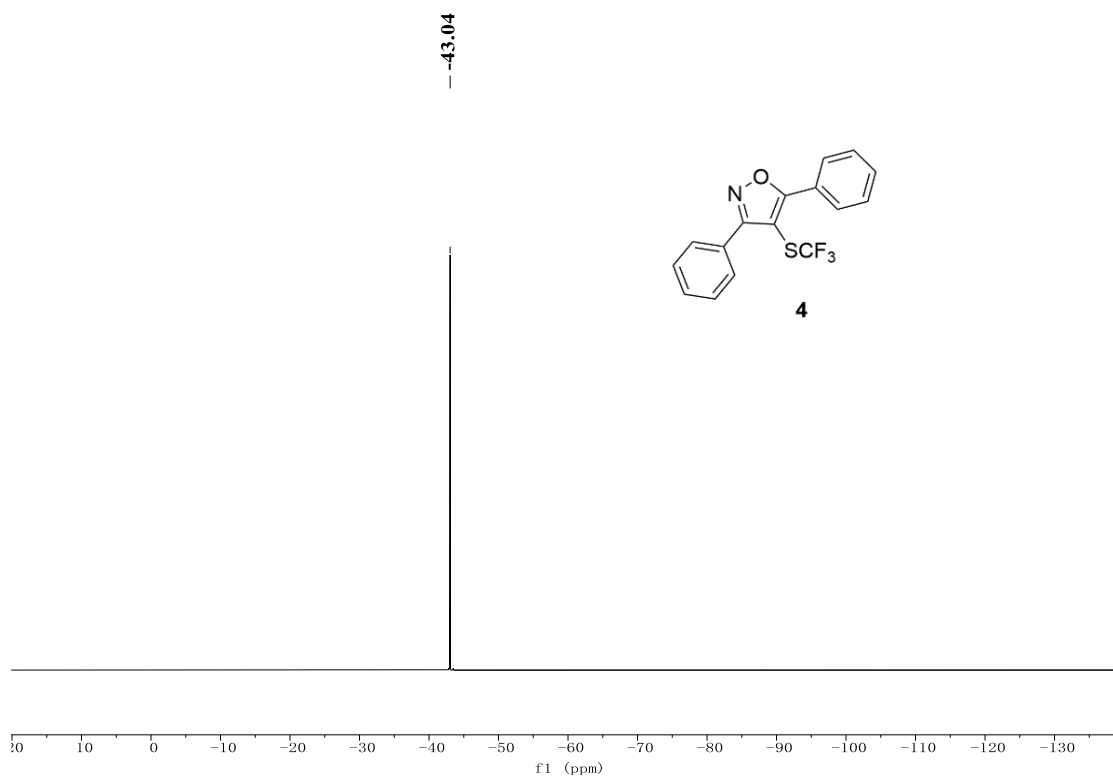

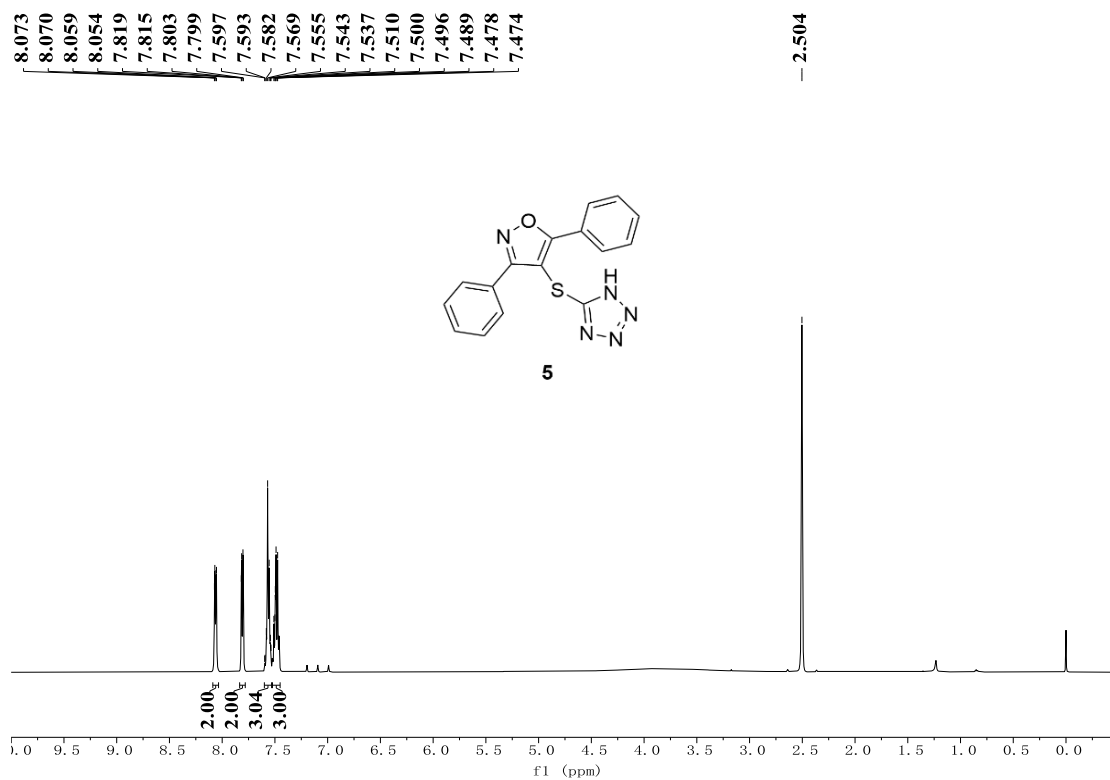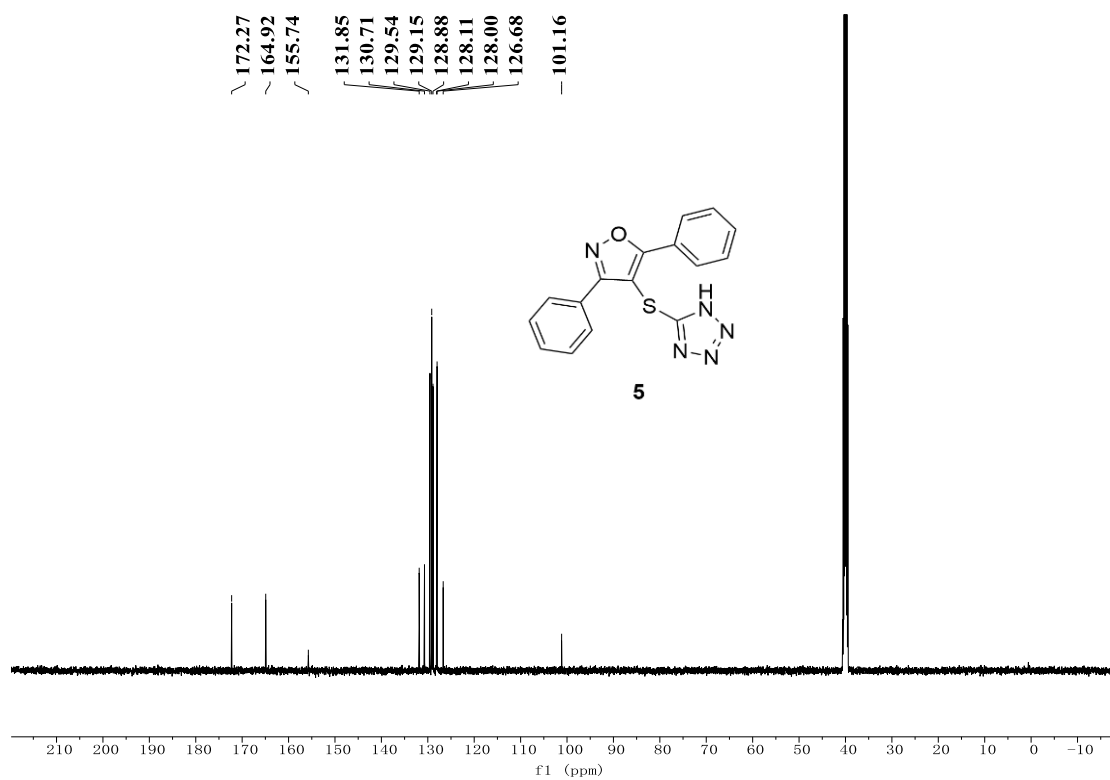

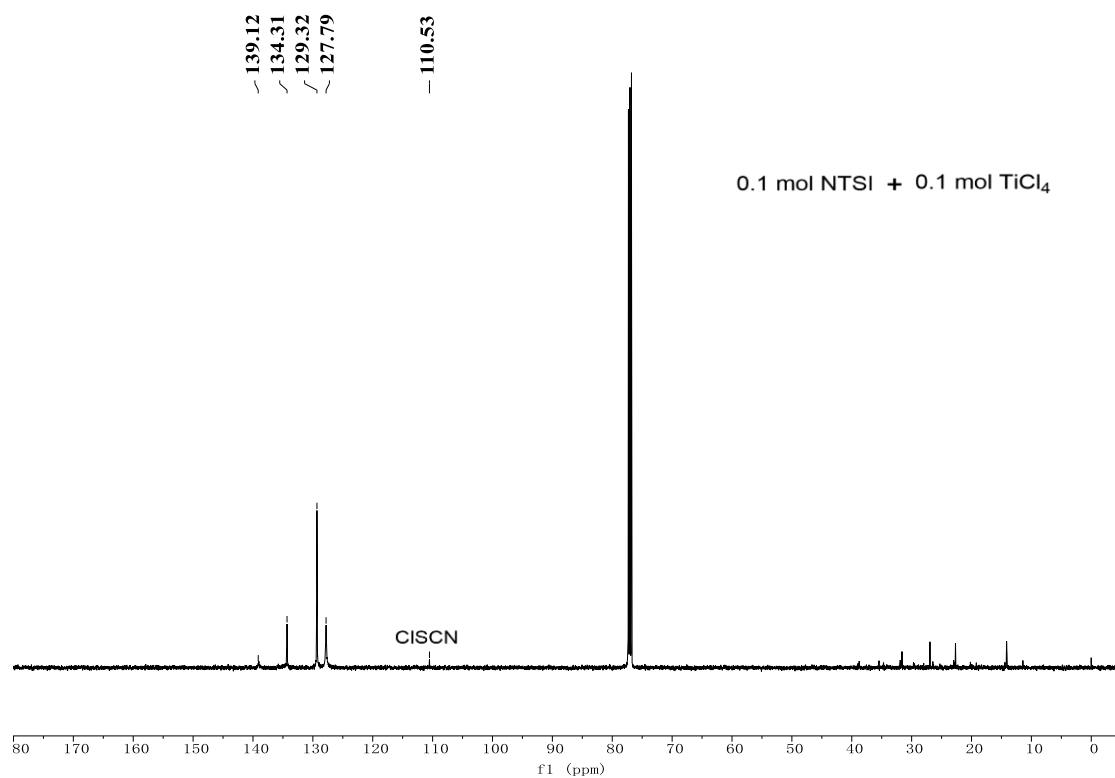

Supplement: d5nj03863d1.pdf [file d5nj03863d1.pdf]
